# Supplementary material for: Elevated Temperature Effects on Protein Turnover Dynamics in <em>Arabidopsis thaliana</em> Seedlings Revealed by 15N-Stable Isotope Labeling and ProteinTurnover Algorithm
Source: Preprints.org preprint supplement (doi:10.20944/preprints202405.0780.v1), 2024-05-13
Supplement: Supplementary file 3 [file supplementary]

## Sheet: Supplementary tables
Title
Elevated Temperature Effects on Protein Turnover Dynamics in Arabidopsis thaliana Seedlings Revealed by 15N-Stable Isotope Labeling and ProteinTurnover Algorithm
Kai-Ting Fan 1, Yuan Xu 2*
1. Agricultural Biotechnology Research Center, Academia Sinica, Taipei, Taiwan; kaitingfan@sinica.edu.tw
2. MSU-DOE Plant Research Laboratory, Michigan State University, East Lansing, MI 48824, USA; xuyuan5@msu.edu
Correspondence: xuyuan5@msu.edu
Supplementary tables
Table S-1. Number of selected peptides after applying each sequential threshold rule and number of proteins identified with significant or insignificant changes in turnover rate after treatment with high temperature.
Table S-2. List of proteins with significant changes in turnover rate (k) due to 30˚C treatment (p < 0.05) identified in the enriched soluble, organelle, and microsomal fractions of Arabidopsis root or shoot seedlings.

## Sheet: Table S-1
Table S-1. Number of selected peptides after applying each sequential threshold rule and number of proteins identified with significant or insignificant changes in turnover rate after treatment with high temperature.
	Root Fraction			Shoot Fraction
	soluble	organellar	microsomal	soluble	organellar	microsomal
(1) # of peptide identified in MSa	9194	5126	14233	10400	5080	6205
(2) # of peptide with valid log2k valuesb	3586	1480	6650	4747	2674	3269
(3) # of peptide at least 80 in Visual Scorec	998	699	2276	1444	1228	1535
(4) # of peptides with standard errord <10	979	678	2226	1406	1164	1502
(5) # of peptide identified at least 3 time points	815	539	1817	1273	1029	1360
(6) # of peptide belonged to proteins identified both in ctrl & 30˚C (computed by the LMM fit method)	722	483	1696	1201	956	1227
(7) # of Proteins with significant change in turnover rate ( p < 0.05) e	46	57	151	123	79	115
(8) # of protein without significant change in turnover rate (p ³ 0.05) f	91	31	84	40	51	65
a Peptides are included in this tally if their score exceeds the false discovery rate threshold of 0.5% and their identification scores exceed 80% confidence. b If the peptide was not identified in the t = 0 sample, the algorithm would not attempt to calculate its turnover rate. c The overall visual score calculated from the spectral fitting of all time points. d Here the standard error was calcu…

## Sheet: Table S-2
Table S-2. List of proteins with significant changes in turnover rate (k) due to 30˚C treatment (p < 0.05) identified in the enriched soluble, organelle, and microsomal fractions of Arabidopsis root or shoot seedlings.
ID	Protein	AGI	N.ctrl	N.30°C	Diff. log2k	Fold change in k	SE	p.value	ctrl.mean	30C.mean	Tissue	Fraction
O65782	Cytochrome P450 83B1 (EC 1.14.-.-) (Protein ALTERED TRYPTOPHAN REGULATION 4) (Protein RED ELONGATED 1) (Protein SUPERROOT 2)	At4g31500	1	1	0.00711501	1.00494	0.124308	0.954357	-4.42795	-4.42083	Root	100kg
P48523	Cinnamyl alcohol dehydrogenase 4 (atCAD4) (EC 1.1.1.195) (Cinnamyl alcohol dehydrogenase C)	At3g19450	1	1	0.134906	1.09802	0.12836	0.293262	-5.37586	-5.24096	Root	soluble
Q42553	Isopentenyl-diphosphate Delta-isomerase II, chloroplastic (EC 5.3.3.2) (Isopentenyl pyrophosphate isomerase II) (IPP isomerase II)	At3g02780	1	1	0.181678	1.1342	0.12836	0.15696	-5.27484	-5.09317	Root	soluble
Q9FK25	Flavone 3'-O-methyltransferase 1 (atOMT1) (EC 2.1.1.42) (Caffeate O-methyltransferase 1) (EC 2.1.1.68) (Quercetin 3'-O-methyltransferase 1)	At5g54160	1	1	0.224735	1.16856	0.13798	0.103365	-5.53735	-5.31262	Shoot	soluble
Q8S4Y1_Q8S4Y1-2	Acetyl-CoA acetyltransferase, cytosolic 1 (EC 2.3.1.9) (Cytosolic acetoacetyl-CoA thiolase 1) (Thiolase 1) (Protein EMBRYO DEFECTIVE 1276)	At5g48230	1	1	0.229159	1.17215	0.12836	0.0742163	-5.1574	-4.92824	Root	soluble
Q9SZB3	Putative uncharacterized protein At4g33360 (Putative uncharacterized protein At4g33360) (Putative uncharacterized protein F17M5.120) (Rossmann-fold NAD(P)-binding domain-containing protein)	At4g33360	1	1	0.409912	1.3286	0.124308	0.000975367	-5.35174	-4.94183	Root	100kg
Q9LJG3	GDSL esterase/lipase ESM1 (EC 3.1.1.-) (Extracellular lipase ESM1) (Protein EPITHIOSPECIFIER MODIFIER 1) (atESM1)	At3g14210	5	2	0.394872	1.31483	0.0993304	7.03e-05	-5.26067	-4.79567	Shoot	1500g
Q8W4H8	Inactive GDSL esterase/lipase-like protein 23 (GDSL-like lipase 23) (Probable myrosinase-associated protein GLL23)	At1g54010	2	5	0.434626	1.35156	0.0620252	2.43e-12	-5.96111	-5.50462	Root	1500g
Q8W4H8	Inactive GDSL esterase/lipase-like protein 23 (GDSL-like lipase 23) (Probable myrosinase-associated protein GLL23)	At1g54010	13	14	0.972639	1.96243	0.040283	8.4e-129	-7.43778	-6.45074	Shoot	1500g
Q3ECS3	Myrosinase 5 (EC 3.2.1.147) (Beta-glucosidase 35) (atBGLU35) (EC 3.2.1.21) (Sinigrinase 5) (Thioglucosidase 5)	At1g51470	1	1	0.378821	1.30028	0.0898525	2.49e-05	-7.42007	-7.04125	Root	1500g
Q9S818	Naringenin,2-oxoglutarate 3-dioxygenase (Naringenin 3-dioxygenase) (EC 1.14.11.9) (F3H) (Flavanone 3-hydroxylase) (Protein TRANSPARENT TESTA 6)	At3g51240	1	1	-0.311115	0.806019	0.12836	0.0153608	-4.50845	-4.81957	Root	soluble
Q9FK25	Flavone 3'-O-methyltransferase 1 (atOMT1) (EC 2.1.1.42) (Caffeate O-methyltransferase 1) (EC 2.1.1.68) (Quercetin 3'-O-methyltransferase 1)	At5g54160	1	2	0.292726	1.22495	0.123873	0.0181221	-5.15869	-4.89655	Root	soluble
Q9CA67	Geranylgeranyl diphosphate reductase, chloroplastic (EC 1.3.1.83) (Geranylgeranyl reductase)	At1g74470	4	4	0.473125	1.38811	0.0772172	8.94e-10	-4.74574	-4.27262	Shoot	100kg
Q9CA67	Geranylgeranyl diphosphate reductase, chloroplastic (EC 1.3.1.83) (Geranylgeranyl reductase)	At1g74470	5	2	0.513233	1.42724	0.0993304	2.38e-07	-4.85655	-4.33731	Shoot	1500g
Q9M0X9	4-coumarate--CoA ligase-like 7 (EC 6.2.1.-) (4-coumarate--CoA ligase isoform 6) (at4CL6)	At4g05160	1	1	0.593907	1.50933	0.124308	1.77e-06	-5.71804	-5.12413	Root	100kg
P92994	Trans-cinnamate 4-monooxygenase (EC 1.14.13.11) (Cinnamic acid 4-hydroxylase) (C4H) (CA4H) (Cytochrome P450 73) (Cytochrome P450C4H)	At2g30490	1	1	0.652373	1.57175	0.227079	0.00406731	-4.98305	-4.33068	Root	1500g
P92994	Trans-cinnamate 4-monooxygenase (EC 1.14.13.11) (Cinnamic acid 4-hydroxylase) (C4H) (CA4H) (Cytochrome P450 73) (Cytochrome P450C4H)	At2g30490	3	3	0.768925	1.704	0.0837203	4.14e-20	-4.91798	-4.22032	Root	100kg
O65396	Aminomethyltransferase, mitochondrial (EC 2.1.2.10) (Glycine cleavage system T protein) (GCVT)	At1g11860	1	1	0.401135	1.32055	0.154434	0.00939194	-6.55159	-6.15046	Shoot	100kg
Q9SJL8	S-adenosylmethionine synthase 3 (AdoMet synthase 3) (EC 2.5.1.6) (Methionine adenosyltransferase 3) (MAT 3)	At2g36880	4	4	0.13723	1.09979	0.0641802	0.0325007	-5.02637	-4.88914	Root	soluble
O65396	Aminomethyltransferase, mitochondrial (EC 2.1.2.10) (Glycine cleavage system T protein) (GCVT)	At1g11860	2	2	0.00846307	1.00588	0.0975664	0.930877	-6.46773	-6.45927	Shoot	soluble
Q9SJL8	S-adenosylmethionine synthase 3 (AdoMet synthase 3) (EC 2.5.1.6) (Methionine adenosyltransferase 3) (MAT 3)	At2g36880	1	1	0.199331	1.14817	0.0898525	0.0265259	-5.43452	-5.23519	Root	1500g
Q9SJL8	S-adenosylmethionine synthase 3 (AdoMet synthase 3) (EC 2.5.1.6) (Methionine adenosyltransferase 3) (MAT 3)	At2g36880	1	1	0.249257	1.18859	0.124308	0.0449472	-5.18321	-4.93395	Root	100kg
Q9SJL8	S-adenosylmethionine synthase 3 (AdoMet synthase 3) (EC 2.5.1.6) (Methionine adenosyltransferase 3) (MAT 3)	At2g36880	1	1	0.208668	1.15562	0.13798	0.130454	-5.70466	-5.49599	Shoot	soluble
O23255	Adenosylhomocysteinase 1 (AdoHcyase 1) (EC 3.3.1.1) (Protein EMBRYO DEFECTIVE 1395) (Protein HOMOLOGY-DEPENDENT GENE SILENCING 1) (S-adenosyl-L-homocysteine hydrolase 1) (SAH hydrolase 1)	At4g13940	1	1	-0.125239	0.916852	0.145875	0.390596	-5.795	-5.92024	Shoot	1500g
O49485	D-3-phosphoglycerate dehydrogenase 1, chloroplastic (EC 1.1.1.95) (Protein EMBRYO SAC DEVELOPMENT ARREST 9)	At4g34200	1	1	-0.0664458	0.954988	0.0898525	0.459604	-6.15627	-6.22271	Root	1500g
O49485	D-3-phosphoglycerate dehydrogenase 1, chloroplastic (EC 1.1.1.95) (Protein EMBRYO SAC DEVELOPMENT ARREST 9)	At4g34200	1	2	-0.0495907	0.96621	0.123873	0.68891	-5.6939	-5.72064	Root	soluble
Q42521	Glutamate decarboxylase 1 (GAD 1) (EC 4.1.1.15)	At5g17330	1	2	-0.0198124	0.986361	0.123873	0.872927	-5.08429	-5.054	Root	soluble
O49485	D-3-phosphoglycerate dehydrogenase 1, chloroplastic (EC 1.1.1.95) (Protein EMBRYO SAC DEVELOPMENT ARREST 9)	At4g34200	2	5	-0.0111407	0.992308	0.0851583	0.895915	-5.78032	-5.87919	Root	100kg
Q0WP12_Q0WP12-2	Thiocyanate methyltransferase 1 (EC 2.1.1.n4) (Protein HARMLESS TO OZONE LAYER 1) (atHOL1)	At2g43910	1	1	0.0271859	1.01902	0.12836	0.832268	-5.22213	-5.19495	Root	soluble
O23255	Adenosylhomocysteinase 1 (AdoHcyase 1) (EC 3.3.1.1) (Protein EMBRYO DEFECTIVE 1395) (Protein HOMOLOGY-DEPENDENT GENE SILENCING 1) (S-adenosyl-L-homocysteine hydrolase 1) (SAH hydrolase 1)	At4g13940	2	2	0.0391853	1.02753	0.113687	0.730338	-5.2621	-5.18338	Root	soluble
P46643	Aspartate aminotransferase, mitochondrial (EC 2.6.1.1) (Transaminase A)	At2g30970	1	1	0.0399736	1.02809	0.12836	0.755484	-5.38345	-5.34348	Root	soluble
Q05758	Ketol-acid reductoisomerase, chloroplastic (EC 1.1.1.86) (Acetohydroxy-acid reductoisomerase) (Alpha-keto-beta-hydroxylacyl reductoisomerase)	At3g58610	2	2	0.0676909	1.04804	0.0907645	0.455797	-4.97566	-4.90797	Root	soluble
P23686	S-adenosylmethionine synthase 1 (AdoMet synthase 1) (EC 2.5.1.6) (Methionine adenosyltransferase 1) (MAT 1)	At1g02500	1	1	0.0697695	1.04955	0.12836	0.586755	-5.10598	-5.03621	Root	soluble
Q42529	Tryptophan synthase alpha chain, chloroplastic (EC 4.2.1.20) (Indole-3-glycerol-phosphate lyase, chloroplastic) (EC 4.1.2.8) (Protein TRYPTOPHAN-REQUIRING 3)	At3g54640	1	1	0.108611	1.07819	0.12836	0.397472	-5.31877	-5.21016	Root	soluble
Q9SRV5	5-methyltetrahydropteroyltriglutamate--homocysteine methyltransferase 2 (EC 2.1.1.14) (Cobalamin-independent methionine synthase 2) (atMS2)	At3g03780	3	2	0.114405	1.08253	0.095989	0.233316	-5.35564	-5.29748	Shoot	soluble
P53780_P53780-2	Cystathionine beta-lyase, chloroplastic (CBL) (EC 4.4.1.8) (Beta-cystathionase) (Cysteine lyase)	At3g57050	1	1	0.224134	1.16808	0.12836	0.0807882	-5.46393	-5.23979	Root	soluble
Q9FZ47	ACT domain-containing protein ACR11 (Protein ACT DOMAIN REPEATS 11)	At1g16880	2	1	0.236324	1.17799	0.13462	0.0791749	-6.39525	-5.83385	Shoot	soluble
Q0WP12_Q0WP12-2_Q0WP12-3	Thiocyanate methyltransferase 1 (EC 2.1.1.n4) (Protein HARMLESS TO OZONE LAYER 1) (atHOL1)	At2g43910	1	1	0.25706	1.19504	0.154434	0.096008	-6.03018	-5.77312	Shoot	100kg
O50008	5-methyltetrahydropteroyltriglutamate--homocysteine methyltransferase 1 (EC 2.1.1.14) (Cobalamin-independent methionine synthase 1) (atMS1) (Vitamin-B12-independent methionine synthase 1)	At5g17920	5	5	0.113452	1.08181	0.0574045	0.0481147	-4.99406	-4.88061	Root	soluble
O50008	5-methyltetrahydropteroyltriglutamate--homocysteine methyltransferase 1 (EC 2.1.1.14) (Cobalamin-independent methionine synthase 1) (atMS1) (Vitamin-B12-independent methionine synthase 1)	At5g17920	7	6	0.195614	1.14521	0.0559415	0.000470944	-5.48658	-5.27488	Shoot	soluble
O50008	5-methyltetrahydropteroyltriglutamate--homocysteine methyltransferase 1 (EC 2.1.1.14) (Cobalamin-independent methionine synthase 1) (atMS1) (Vitamin-B12-independent methionine synthase 1)	At5g17920	2	2	0.217187	1.16246	0.0635353	0.000629989	-5.33189	-5.1147	Root	1500g
Q05758	Ketol-acid reductoisomerase, chloroplastic (EC 1.1.1.86) (Acetohydroxy-acid reductoisomerase) (Alpha-keto-beta-hydroxylacyl reductoisomerase)	At3g58610	2	2	0.24527	1.18531	0.0975664	0.0119411	-5.63016	-5.38489	Shoot	soluble
O50008	5-methyltetrahydropteroyltriglutamate--homocysteine methyltransferase 1 (EC 2.1.1.14) (Cobalamin-independent methionine synthase 1) (atMS1) (Vitamin-B12-independent methionine synthase 1)	At5g17920	2	3	0.246579	1.18639	0.101045	0.014676	-5.6062	-5.1871	Shoot	1500g
O50008	5-methyltetrahydropteroyltriglutamate--homocysteine methyltransferase 1 (EC 2.1.1.14) (Cobalamin-independent methionine synthase 1) (atMS1) (Vitamin-B12-independent methionine synthase 1)	At5g17920	4	5	0.26393	1.20075	0.0615149	1.78e-05	-5.2399	-4.96978	Root	100kg
Q9LZ23	ACT domain-containing protein ACR12 (Protein ACT DOMAIN REPEATS 12)	At5g04740	1	1	0.276484	1.21124	0.124308	0.0261367	-5.59808	-5.32159	Root	100kg
Q9SZX3	Argininosuccinate synthase, chloroplastic (EC 6.3.4.5) (Citrulline--aspartate ligase)	At4g24830	1	1	0.279089	1.21343	0.13798	0.0431058	-5.86255	-5.58346	Shoot	soluble
O50008	5-methyltetrahydropteroyltriglutamate--homocysteine methyltransferase 1 (EC 2.1.1.14) (Cobalamin-independent methionine synthase 1) (atMS1) (Vitamin-B12-independent methionine synthase 1)	At5g17920	4	5	0.290209	1.22282	0.0822471	0.000417915	-5.72513	-5.32257	Shoot	100kg
P23686	S-adenosylmethionine synthase 1 (AdoMet synthase 1) (EC 2.5.1.6) (Methionine adenosyltransferase 1) (MAT 1)	At1g02500	1	1	0.383141	1.30418	0.13798	0.00548982	-5.44404	-5.0609	Shoot	soluble
Q0WP12_Q0WP12-2	Thiocyanate methyltransferase 1 (EC 2.1.1.n4) (Protein HARMLESS TO OZONE LAYER 1) (atHOL1)	At2g43910	2	2	0.522785	1.43673	0.0975664	8.4e-08	-6.10523	-5.58244	Shoot	soluble
P47998	Cysteine synthase 1 (EC 2.5.1.47) (at.OAS.5-8) (Beta-substituted Ala synthase 1;1) (ARath-Bsas1;1) (CSase A) (atCS-A) (Cys-3A) (O-acetylserine (thiol)-lyase 1) (OAS-TL A) (O-acetylserine sulfhydrylase) (Protein ONSET OF LEAF DEATH 3)	At4g14880	2	2	0.529342	1.44327	0.0975664	5.78e-08	-5.83086	-5.30152	Shoot	soluble
Q9C5U8_Q9C5U8-2	Histidinol dehydrogenase, chloroplastic (HDH) (EC 1.1.1.23) (Protein HISTIDINE BIOSYNTHESIS 8)	At5g63890	1	1	0.609869	1.52612	0.13798	9.87e-06	-6.00357	-5.3937	Shoot	soluble
Q9S757	Bifunctional L-3-cyanoalanine synthase/cysteine synthase C1, mitochondrial (EC 2.5.1.47) (EC 4.4.1.9) (Beta-substituted Ala synthase 3;1) (ARath-Bsas3;1) (Cysteine synthase C1) (atCYSC1) (O-acetylserine (thiol)-lyase 5)	At3g61440	1	1	0.719265	1.64634	0.154434	3.2e-06	-5.92122	-5.20196	Shoot	100kg
Q9LR30	Glutamate--glyoxylate aminotransferase 1 (atGGT2) (EC 2.6.1.4) (Alanine aminotransferase GGT1) (EC 2.6.1.2) (Alanine--glyoxylate aminotransferase GGT1) (EC 2.6.1.44) (Alanine-2-oxoglutarate aminotransferase 1) (EC 2.6.1.-)	At1g23310	2	1	0.798217	1.73895	0.13462	3.04e-09	-5.43316	-4.63622	Shoot	soluble
Q96533	Alcohol dehydrogenase class-3 (EC 1.1.1.1) (Alcohol dehydrogenase class-III) (Glutathione-dependent formaldehyde dehydrogenase) (FALDH) (FDH) (GSH-FDH) (EC 1.1.1.-) (S-(hydroxymethyl)glutathione dehydrogenase) (EC 1.1.1.284)	At5g43940	1	3	0.0697274	1.04952	0.122341	0.568715	-5.03935	-5.01492	Root	soluble
O65398	Lactoylglutathione lyase (EC 4.4.1.5) (Glyoxalase I)	At1g11840	2	3	0.130387	1.09459	0.0886617	0.141397	-5.31767	-5.19	Root	soluble
O65398	Lactoylglutathione lyase (EC 4.4.1.5) (Glyoxalase I)	At1g11840	1	2	0.642113	1.56061	0.13462	1.84e-06	-5.86113	-5.11941	Shoot	soluble
Q9SE60	Methylenetetrahydrofolate reductase 1 (atMTHFR1) (EC 1.5.1.20)	At3g59970	2	1	-0.164653	0.892143	0.212062	0.437491	-5.28408	-5.44874	Root	soluble
O23254	Serine hydroxymethyltransferase 4 (atSHMT4) (EC 2.1.2.1) (Glycine hydroxymethyltransferase 4) (Serine methylase 4)	At4g13930	2	2	-0.143147	0.905541	0.0975664	0.142327	-5.82601	-5.96916	Shoot	soluble
O23254	Serine hydroxymethyltransferase 4 (atSHMT4) (EC 2.1.2.1) (Glycine hydroxymethyltransferase 4) (Serine methylase 4)	At4g13930	3	3	0.0306664	1.02148	0.0741089	0.679019	-5.30656	-5.27589	Root	soluble
Q9SE60	Methylenetetrahydrofolate reductase 1 (atMTHFR1) (EC 1.5.1.20)	At3g59970	2	2	0.154458	1.113	0.0975664	0.113396	-5.61989	-5.46544	Shoot	soluble
Q94C74	Serine hydroxymethyltransferase 2, mitochondrial	At5g26780	1	1	-0.883747	0.541958	0.244869	0.000307299	-5.35599	-6.23973	Root	soluble
Q9SZJ5	Serine hydroxymethyltransferase 1, mitochondrial (atSHMT1) (EC 2.1.2.1) (Glycine hydroxymethyltransferase 1) (Serine Transhydroxymethyltransferase) (STM) (Serine methylase 1)	At4g37930	4	3	0.359702	1.28316	0.0786987	4.86e-06	-5.89888	-5.54224	Shoot	soluble
Q9SZJ5	Serine hydroxymethyltransferase 1, mitochondrial (atSHMT1) (EC 2.1.2.1) (Glycine hydroxymethyltransferase 1) (Serine Transhydroxymethyltransferase) (STM) (Serine methylase 1)	At4g37930	3	3	0.397149	1.3169	0.100339	7.56e-05	-5.90324	-5.5624	Shoot	100kg
Q9SZJ5	Serine hydroxymethyltransferase 1, mitochondrial (atSHMT1) (EC 2.1.2.1) (Glycine hydroxymethyltransferase 1) (Serine Transhydroxymethyltransferase) (STM) (Serine methylase 1)	At4g37930	3	1	0.428084	1.34545	0.139862	0.0022077	-6.0981	-5.48923	Shoot	1500g
Q9SKR2	Synaptotagmin-1 (NTMC2T1.1) (Synaptotagmin A)	At2g20990	2	2	0.268836	1.20484	0.0878994	0.00222485	-5.49743	-5.22859	Root	100kg
F4J5S1_F4J5S1-2	Clustered mitochondria protein homolog	At3g52140	1	1	0.347319	1.27219	0.124308	0.00520587	-4.62665	-4.27933	Root	100kg
O04616	Protein CURVATURE THYLAKOID 1A, chloroplastic	At4g01150	2	1	0.367099	1.28976	0.141389	0.00942113	-6.24949	-5.91609	Shoot	1500g
O04616	Protein CURVATURE THYLAKOID 1A, chloroplastic	At4g01150	2	3	0.650554	1.56977	0.105791	7.78e-10	-6.2283	-5.23694	Shoot	100kg
Q9SYT0	Annexin D1 (Annat1) (Annexin A1)	At1g35720	1	1	-0.0472896	0.967753	0.124308	0.703633	-5.66703	-5.71432	Root	100kg
Q42449	Profilin-1 (allergen Ara t 8)	At2g19760	1	1	-0.00116105	0.999196	0.12836	0.992783	-5.01839	-5.01956	Root	soluble
Q8LAP6	Probable plastid-lipid-associated protein 12, chloroplastic (Fibrillin-10)	At1g51110	1	1	0.00526826	1.00366	0.154434	0.972787	-6.12584	-6.12057	Shoot	100kg
Q96292_Q96293	Actin-2/Actin-8	At3g18780,At1g49240	2	1	0.0564867	1.03993	0.123873	0.648386	-5.44746	-5.2545	Root	soluble
Q56WH1	Tubulin alpha-3 chain	At5g19770	2	1	0.0597209	1.04226	0.121087	0.621866	-5.52671	-5.45868	Root	100kg
Q9SYT0	Annexin D1 (Annat1) (Annexin A1)	At1g35720	1	1	0.143685	1.10472	0.12836	0.262974	-5.28921	-5.14552	Root	soluble
Q38935	Peptidyl-prolyl cis-trans isomerase FKBP15-1 (PPIase FKBP15-1) (EC 5.2.1.8) (15 kDa FK506-binding protein) (15 kDa FKBP) (FK506-binding protein 15-1) (atFKBP15-1) (FK506-binding protein 2-1) (Immunophilin FKBP15-1) (Rotamase)	At3g25220	1	1	0.160165	1.11741	0.12836	0.212114	-5.07975	-4.91958	Root	soluble
Q42406	Peptidyl-prolyl cis-trans isomerase CYP18-4 (PPIase CYP18-4) (EC 5.2.1.8) (Cyclophilin of 18 kDa 4) (Cyclophilin-1) (Rotamase cyclophilin-5)	At4g34870	1	2	0.170389	1.12536	0.123873	0.168973	-5.10509	-4.93255	Root	soluble
P29513	Tubulin beta-5 chain (Beta-5-tubulin)	At1g20010	1	1	0.171306	1.12608	0.124308	0.168181	-5.63603	-5.46472	Root	100kg
Q9XEE2	Annexin D2 (Annat2)	At5g65020	1	1	0.206866	1.15418	0.12836	0.107048	-5.23079	-5.02392	Root	soluble
Q56WH1	Tubulin alpha-3 chain	At5g19770	1	2	0.225427	1.16912	0.13462	0.094023	-6.01612	-5.75519	Shoot	soluble
Q96292_Q96293	Actin-2/Actin-8	At3g18780,At1g49240	1	2	0.344295	1.26953	0.272399	0.206253	-5.94072	-5.59643	Shoot	soluble
Q96292_Q96293	Actin-2/Actin-8	At3g18780,At1g49240	3	3	0.244369	1.18457	0.0717695	0.000661843	-5.48998	-5.24561	Root	100kg
Q0WW26	Coatomer subunit gamma (Gamma-coat protein) (Gamma-COP)	At4g34450	2	1	0.260641	1.19801	0.121087	0.0313571	-5.12848	-4.94593	Root	100kg
Q56YW9	Tubulin beta-2 chain	At5g62690	1	1	0.277472	1.21207	0.124308	0.0256069	-4.56893	-4.29146	Root	100kg
Q9LW57	Probable plastid-lipid-associated protein 6, chloroplastic (Fibrillin-4) (Fibrillin-6) (Harpin-binding protein 1) (HrBP1) (Plastoglobulin 30.45) (atPGL30.4)	At3g23400	3	3	0.297252	1.2288	0.0842208	0.000416455	-6.27157	-5.97432	Shoot	1500g
Q9LW57	Probable plastid-lipid-associated protein 6, chloroplastic (Fibrillin-4) (Fibrillin-6) (Harpin-binding protein 1) (HrBP1) (Plastoglobulin 30.45) (atPGL30.4)	At3g23400	3	4	0.299269	1.23052	0.0870828	0.000589069	-6.0595	-5.76165	Shoot	100kg
Q38900	Peptidyl-prolyl cis-trans isomerase CYP19-1 (PPIase CYP19-1) (EC 5.2.1.8) (Cyclophilin of 19 kDa 1) (Rotamase cyclophilin-3)	At2g16600	1	2	0.321395	1.24954	0.123873	0.00947141	-5.2391	-4.92486	Root	soluble
Q0WNJ6	Clathrin heavy chain 1	At3g11130	1	1	0.334898	1.26129	0.0898525	0.000193617	-5.50632	-5.17142	Root	1500g
Q0WNJ6	Clathrin heavy chain 1	At3g11130	1	1	0.349553	1.27417	0.124308	0.00492375	-5.48144	-5.13189	Root	100kg
Q38900	Peptidyl-prolyl cis-trans isomerase CYP19-1 (PPIase CYP19-1) (EC 5.2.1.8) (Cyclophilin of 19 kDa 1) (Rotamase cyclophilin-3)	At2g16600	2	2	0.353246	1.27743	0.0975664	0.00029395	-5.37937	-5.02612	Shoot	soluble
P29513	Tubulin beta-5 chain (Beta-5-tubulin)	At1g20010	1	1	0.356635	1.28044	0.154434	0.0209272	-6.24349	-5.88685	Shoot	100kg
P54609	Cell division control protein 48 homolog A (atCDC48a)	At3g09840	1	1	0.360024	1.28345	0.124308	0.00377698	-4.78759	-4.42757	Root	100kg
P29513	Tubulin beta-5 chain (Beta-5-tubulin)	At1g20010	1	1	0.368325	1.29085	0.13798	0.00759836	-6.08475	-5.71642	Shoot	soluble
Q8GUN1	At4g31340 protein (Myosin heavy chain-related protein) (Putative uncharacterized protein At4g31340)	At4g31340	1	1	0.384904	1.30577	0.124308	0.0019591	-4.81886	-4.43396	Root	100kg
P24636	Tubulin beta-4 chain (Beta-4-tubulin)	At5g44340	2	1	0.410655	1.32929	0.147141	0.00525623	-5.97979	-5.54114	Shoot	100kg
Q93Y22	Coatomer subunit delta (Delta-coat protein) (Delta-COP)	At5g05010	1	1	0.433138	1.35017	0.124308	0.000493273	-5.50797	-5.07483	Root	100kg
O04331	Prohibitin-3, mitochondrial (atphb3) (Protein ENHANCED ETHYLENE RESPONSE 3)	At5g40770	1	1	0.538786	1.45275	0.0898525	2.02e-09	-5.69962	-5.16083	Root	1500g
O04331	Prohibitin-3, mitochondrial (atphb3) (Protein ENHANCED ETHYLENE RESPONSE 3)	At5g40770	1	2	0.545797	1.45983	0.121087	6.56e-06	-5.57867	-4.98945	Root	100kg
O82291	Probable plastid-lipid-associated protein 3, chloroplastic (atPap3) (Fibrillin-2) (Plastoglobulin 40) (atPGL40)	At2g35490	1	1	0.551173	1.46528	0.145875	0.000157842	-6.53702	-5.98585	Shoot	1500g
Q9SVC2	Syntaxin-122 (atSYP122) (Synt4)	At3g52400	1	1	0.596097	1.51162	0.124308	1.62e-06	-5.47811	-4.88201	Root	100kg
P53492	Actin-7 (Actin-2)	At5g09810	1	1	0.601418	1.51721	0.154434	9.85e-05	-5.68043	-5.07902	Shoot	100kg
Q9XEE2	Annexin D2 (Annat2)	At5g65020	1	1	0.615575	1.53217	0.124308	7.35e-07	-6.28342	-5.66784	Root	100kg
Q9LU05	Plasma membrane-associated cation-binding protein 2 (atPCAP2) (Lysine rich protein at168) (Microtubule-associated protein 18)	At5g44610	1	1	0.617452	1.53416	0.124308	6.8e-07	-5.53587	-4.91842	Root	100kg
O04331	Prohibitin-3, mitochondrial (atphb3) (Protein ENHANCED ETHYLENE RESPONSE 3)	At5g40770	2	2	0.624387	1.54156	0.109202	1.08e-08	-5.86684	-5.24246	Shoot	100kg
P53492	Actin-7 (Actin-2)	At5g09810	1	1	0.633281	1.55109	0.13798	4.44e-06	-5.41477	-4.78149	Shoot	soluble
B9DGT7	Tubulin alpha-2 chain	At1g50010	2	2	0.645443	1.56422	0.109202	3.41e-09	-5.96836	-5.32291	Shoot	100kg
Q84JW1	Peroxisomal membrane protein 11E (Peroxin-11E) (atPEX11e)	At3g61070	1	1	0.662554	1.58288	0.124308	9.83e-08	-5.67068	-5.00812	Root	100kg
P53492	Actin-7 (Actin-2)	At5g09810	1	1	0.671929	1.5932	0.145875	4.1e-06	-5.73283	-5.0609	Shoot	1500g
P34790	Peptidyl-prolyl cis-trans isomerase CYP18-3 (PPIase CYP18-3) (EC 5.2.1.8) (Cyclophilin of 18 kDa 3) (Cyclosporin A-binding protein) (Rotamase cyclophilin-1)	At4g38740	1	1	0.803549	1.74539	0.13798	5.76e-09	-5.66315	-4.8596	Shoot	soluble
O49006	Pectinesterase/pectinesterase inhibitor 3 [Includes: Pectinesterase inhibitor 3 (Pectin methylesterase inhibitor 3); Pectinesterase 3 (PE 3) (EC 3.1.1.11) (Pectin methylesterase 27) (atPME27) (Pectin methylesterase 3)]	At3g14310	1	1	-0.25081	0.840425	0.13798	0.0691054	-5.3858	-5.63661	Shoot	soluble
Q9SGE0	UDP-D-apiose/UDP-D-xylose synthase 2	At1g08200	3	1	0.147225	1.10744	0.122341	0.228821	-4.82363	-4.72817	Root	soluble
O22126	Fasciclin-like arabinogalactan protein 8 (atAGP8)	At2g45470	4	3	0.326372	1.25386	0.0708456	4.09e-06	-5.74687	-5.39365	Root	100kg
Q9FFH6	Fasciclin-like arabinogalactan protein 13	At5g44130	1	1	0.354804	1.27881	0.154434	0.0215937	-5.60188	-5.24708	Shoot	100kg
Q9LFW1	UDP-arabinopyranose mutase 2 (EC 5.4.99.30) (Reversibly glycosylated polypeptide 2) (atRGP2) (UDP-L-arabinose mutase 2)	At5g15650	1	1	0.438677	1.35536	0.124308	0.000417227	-5.6375	-5.19883	Root	100kg
Q9SYM5	Trifunctional UDP-glucose 4,6-dehydratase/UDP-4-keto-6-deoxy-D-glucose 3,5-epimerase/UDP-4-keto-L-rhamnose-reductase RHM1 (Protein REPRESSOR OF LRX1 1) (Rhamnose biosynthetic enzyme 1) (atRHM1) [Includes: UDP-glucose 4,6-dehydratase (EC 4.2.1.76); UDP-4-keto-6-deoxy-D-glucose 3,5-epimerase/UDP-4-keto-L-rhamnose 4-keto-reductase (EC 1.1.1.-) (EC 5.1.3.-)]	At1g78570	2	1	0.532712	1.44665	0.121087	1.09e-05	-4.62412	-4.10018	Root	100kg
O22126	Fasciclin-like arabinogalactan protein 8 (atAGP8)	At2g45470	2	2	0.577921	1.4927	0.109202	1.21e-07	-5.73749	-5.15957	Shoot	100kg
Q9C525_Q9C525-2	Beta-glucosidase 21 (atBGLU21) (EC 3.2.1.21) (Protein PHOSPHATE STARVATION-RESPONSE 3.2)	At1g66270	2	1	-0.116606	0.922355	0.121087	0.335548	-5.4311	-5.51698	Root	100kg
Q9C8Y9	Beta-glucosidase 22 (atBGLU22) (EC 3.2.1.21)	At1g66280	1	1	0.0967856	1.06939	0.12836	0.45084	-5.68096	-5.58418	Root	soluble
Q9SR37	Beta-glucosidase 23 (atBGLU23) (EC 3.2.1.21) (Protein PHOSPHATE STARVATION-RESPONSE 3.1)	At3g09260	5	4	0.128705	1.09331	0.0632923	0.042001	-5.67167	-5.53721	Root	soluble
Q9C8Y9	Beta-glucosidase 22 (atBGLU22) (EC 3.2.1.21)	At1g66280	4	3	0.18539	1.13712	0.0603089	0.0021121	-6.1499	-5.93159	Root	1500g
Q9SR37	Beta-glucosidase 23 (atBGLU23) (EC 3.2.1.21) (Protein PHOSPHATE STARVATION-RESPONSE 3.1)	At3g09260	10	11	0.255453	1.19371	0.0295773	5.78e-18	-5.64471	-5.37068	Root	1500g
Q9SR37	Beta-glucosidase 23 (atBGLU23) (EC 3.2.1.21) (Protein PHOSPHATE STARVATION-RESPONSE 3.1)	At3g09260	6	8	0.282665	1.21644	0.0500954	1.68e-08	-5.66027	-5.39446	Root	100kg
Q9C8Y9	Beta-glucosidase 22 (atBGLU22) (EC 3.2.1.21)	At1g66280	3	3	0.463805	1.37917	0.0837203	3.03e-08	-6.59351	-6.01156	Root	100kg
Q9SR37	Beta-glucosidase 23 (atBGLU23) (EC 3.2.1.21) (Protein PHOSPHATE STARVATION-RESPONSE 3.1)	At3g09260	2	1	0.647899	1.56688	0.147141	1.07e-05	-7.21802	-6.47965	Shoot	100kg
Q9SR37	Beta-glucosidase 23 (atBGLU23) (EC 3.2.1.21) (Protein PHOSPHATE STARVATION-RESPONSE 3.1)	At3g09260	11	11	0.707347	1.6328	0.0439829	3.39e-58	-7.20043	-6.49309	Shoot	1500g
Q9SR37	Beta-glucosidase 23 (atBGLU23) (EC 3.2.1.21) (Protein PHOSPHATE STARVATION-RESPONSE 3.1)	At3g09260	3	3	0.984275	1.97832	0.0796626	4.55e-35	-7.68391	-6.69963	Shoot	soluble
Q9C5C2_Q9C5C2-2	Beta-glucosidase 21 (atBGLU21) (EC 3.2.1.21) (Protein PHOSPHATE STARVATION-RESPONSE 3.2)	At1g66270	1	1	1.09694	2.139	0.13798	1.87e-15	-6.06032	-4.96338	Shoot	soluble
Q9FNC4	HAD superfamily, subfamily IIIB acid phosphatase (Putative vegetative storage protein) (Vegetative storage protein-like)	At5g44020	2	1	-0.0130746	0.990978	0.0880764	0.88199	-5.93873	-5.95042	Root	1500g
Q9FNC4	HAD superfamily, subfamily IIIB acid phosphatase (Putative vegetative storage protein) (Vegetative storage protein-like)	At5g44020	2	1	0.0636383	1.0451	0.121087	0.599194	-6.05537	-6.23054	Root	100kg
O24456	Guanine nucleotide-binding protein subunit beta-like protein A (Receptor for activated C kinase 1A) (WD-40 repeat auxin-dependent protein ARCA)	At1g18080	1	1	0.0848463	1.06057	0.12836	0.508612	-5.02069	-4.93584	Root	soluble
P31265	Translationally-controlled tumor protein homolog (TCTP)	At3g16640	2	2	0.0878267	1.06277	0.0907645	0.333228	-4.96427	-4.87644	Root	soluble
Q93Z16	Dolichyl-diphosphooligosaccharide--protein glycosyltransferase subunit 2 (EC 2.4.99.18) (Protein HAPLESS 6) (Ribophorin II) (RPN-II) (Ribophorin-2)	At4g21150	4	2	0.328642	1.25583	0.0856212	0.000123877	-5.3189	-5.02872	Root	100kg
O80576	At2g44060 (Late embryogenesis abundant protein, group 2) (Similar to late embryogenesis abundant proteins)	At2g44060	1	3	0.415076	1.33337	0.119994	0.000541884	-5.22334	-4.83562	Root	100kg
P31265	Translationally-controlled tumor protein homolog (TCTP)	At3g16640	1	1	0.42615	1.34364	0.0898525	2.11e-06	-5.45926	-5.03311	Root	1500g
O24456	Guanine nucleotide-binding protein subunit beta-like protein A (Receptor for activated C kinase 1A) (WD-40 repeat auxin-dependent protein ARCA)	At1g18080	1	1	0.450285	1.36631	0.13798	0.00110077	-5.83136	-5.38107	Shoot	soluble
P31265	Translationally-controlled tumor protein homolog (TCTP)	At3g16640	1	2	0.466007	1.38128	0.13462	0.000536861	-5.50151	-4.90313	Shoot	soluble
O23179	Patatin-like protein 1 (atPLP1) (EC 3.1.1.-) (Patatin-related phospholipase A IIgamma) (pPLAIIg) (Phospholipase A IVA) (atPLAIVA)	At4g37070	2	2	0.487187	1.40171	0.113258	1.7e-05	-6.2449	-5.66915	Root	100kg
O80576	At2g44060 (Late embryogenesis abundant protein, group 2) (Similar to late embryogenesis abundant proteins)	At2g44060	3	1	0.487601	1.40211	0.207612	0.0188432	-5.89167	-5.40407	Shoot	100kg
P93042_P93042-2	Protein ROOT HAIR DEFECTIVE 3 (EC 3.6.5.-) (Protein FRAGILE FIBER 4) (Protein SEY1 homolog 1)	At3g13870	3	3	0.499633	1.41385	0.0717695	3.36e-12	-4.96136	-4.46172	Root	100kg
O80576	At2g44060 (Late embryogenesis abundant protein, group 2) (Similar to late embryogenesis abundant proteins)	At2g44060	1	2	0.530643	1.44457	0.0880764	1.69e-09	-5.42838	-4.87407	Root	1500g
P59259	Histone H4	At1g07660,At1g07820,At2g28740; At3g45930; At3g46320; At3g53730; At5g59690; At5g59970	3	3	-0.102907	0.931155	0.0974181	0.29081	-5.95557	-6.11821	Shoot	1500g
Q9LQQ4_Q9ZUS0	Histone H2B.1 (HTB1)/ H2B.4 (HTB5)	At1g07790,At2g37470	2	2	-0.0688104	0.953424	0.103149	0.50471	-5.41519	-5.484	Shoot	1500g
P59259	Histone H4	At1g07660,At1g07820,At2g28740; At3g45930; At3g46320; At3g53730; At5g59690; At5g59970	4	3	0.104018	1.07476	0.0708456	0.14204	-5.88011	-5.74727	Root	100kg
P59259	Histone H4	At1g07660,At1g07820,At2g28740; At3g45930; At3g46320; At3g53730; At5g59690; At5g59970	2	2	0.194161	1.14406	0.109202	0.0754031	-6.05393	-5.85977	Shoot	100kg
P59259	Histone H4	At1g07660,At1g07820,At2g28740; At3g45930; At3g46320; At3g53730; At5g59690; At5g59970	3	3	0.103401	1.0743	0.0518763	0.0462382	-5.98328	-5.87988	Root	1500g
Q9LSB4	TSA1-like protein (Protein NAI2)	At3g15950	3	7	0.295273	1.22712	0.0711403	3.32e-05	-5.4659	-5.15685	Root	soluble
Q9LSB4	TSA1-like protein (Protein NAI2)	At3g15950	1	1	0.620361	1.53726	0.274785	0.0239692	-5.67838	-5.05802	Root	100kg
Q9SU63	Aldehyde dehydrogenase family 2 member B4, mitochondrial (ALDH2a) (EC 1.2.1.3)	At3g48000	1	1	0.0642597	1.04555	0.154434	0.677339	-5.80209	-5.73783	Shoot	100kg
Q9C9I7	Putative uncharacterized protein At1g71500 (Putative uncharacterized protein At1g71500/F26A9_12) (Putative uncharacterized protein F26A9.12) (Rieske (2Fe-2S) domain-containing protein)	At1g71500	3	1	0.136267	1.09906	0.144628	0.346096	-5.96062	-5.80312	Shoot	100kg
Q9C9I7	Putative uncharacterized protein At1g71500 (Putative uncharacterized protein At1g71500/F26A9_12) (Putative uncharacterized protein F26A9.12) (Rieske (2Fe-2S) domain-containing protein)	At1g71500	2	1	0.231878	1.17436	0.141389	0.101005	-6.00145	-5.78164	Shoot	1500g
Q9LU14	GDSL esterase/lipase APG (EC 3.1.1.-) (Extracellular lipase APG)	At3g16370	1	1	0.700451	1.62501	0.145875	1.57e-06	-5.38444	-4.68399	Shoot	1500g
O04499	2,3-bisphosphoglycerate-independent phosphoglycerate mutase 1 (BPG-independent PGAM 1) (Phosphoglyceromutase 1) (EC 5.4.2.12) (PGAM-I 1)	At1g09780	2	3	0.0558371	1.03946	0.0886617	0.528841	-5.21191	-5.04235	Root	soluble
P25696	Bifunctional enolase 2/transcriptional activator (EC 4.2.1.11) (2-phospho-D-glycerate hydro-lyase 2) (2-phosphoglycerate dehydratase 2) (LOW EXPRESSION OF OSMOTICALLY RESPONSIVE GENES 1)	At2g36530	1	2	0.0576582	1.04077	0.123873	0.641601	-5.05058	-4.95072	Root	soluble
Q9FX54	Glyceraldehyde-3-phosphate dehydrogenase GAPC2, cytosolic (EC 1.2.1.12) (NAD-dependent glyceraldehydephosphate dehydrogenase C subunit 2)	At1g13440	1	1	0.0801079	1.0571	0.12836	0.532571	-5.49948	-5.41937	Root	soluble
Q9LF98	Fructose-bisphosphate aldolase (EC 4.1.2.13)	At3g52930	1	1	0.0807232	1.05755	0.12836	0.529428	-5.34983	-5.26911	Root	soluble
Q9C9C4	Enolase 1, chloroplastic (EC 4.2.1.11) (2-phospho-D-glycerate hydro-lyase 1) (2-phosphoglycerate dehydratase 1)	At1g74030	1	1	0.126514	1.09165	0.12836	0.324323	-5.67244	-5.54593	Root	soluble
Q94KE3	Pyruvate kinase (EC 2.7.1.40)	At3g52990	1	1	0.139484	1.10151	0.124308	0.261827	-5.21509	-5.07561	Root	100kg
Q9SAJ4	Phosphoglycerate kinase (EC 2.7.2.3)	At1g79550	1	1	0.17839	1.13162	0.12836	0.164602	-4.96999	-4.7916	Root	soluble
P25696	Bifunctional enolase 2/transcriptional activator (EC 4.2.1.11) (2-phospho-D-glycerate hydro-lyase 2) (2-phosphoglycerate dehydratase 2) (LOW EXPRESSION OF OSMOTICALLY RESPONSIVE GENES 1)	At2g36530	1	1	0.284908	1.21833	0.254272	0.262507	-5.88897	-5.60406	Shoot	100kg
Q9LF98	Fructose-bisphosphate aldolase (EC 4.1.2.13)	At3g52930	4	4	0.146754	1.10708	0.0621542	0.0182195	-5.50794	-5.36119	Root	100kg
Q9LF98	Fructose-bisphosphate aldolase (EC 4.1.2.13)	At3g52930	3	3	0.170354	1.12533	0.0796626	0.0324805	-5.70079	-5.53044	Shoot	soluble
P25858_Q9FX54	Glyceraldehyde-3-phosphate dehydrogenase GAPC1/ GAPC2, cytosolic (EC 1.2.1.12)	At3g04120,At1g13440	5	3	0.191135	1.14166	0.0940195	0.0420592	-6.01641	-5.78996	Shoot	1500g
Q5GM68	Phosphoenolpyruvate carboxylase 2 (atPPC2) (PEPC 2) (PEPCase 2) (EC 4.1.1.31)	At2g42600	4	4	0.200557	1.14914	0.0689898	0.00364849	-6.03845	-5.83789	Shoot	soluble
Q9FX54	Glyceraldehyde-3-phosphate dehydrogenase GAPC2, cytosolic (EC 1.2.1.12) (NAD-dependent glyceraldehydephosphate dehydrogenase C subunit 2)	At1g13440	5	5	0.201403	1.14982	0.0690652	0.0035441	-5.90765	-5.70624	Shoot	100kg
Q9LF98	Fructose-bisphosphate aldolase (EC 4.1.2.13)	At3g52930	2	3	0.226825	1.17026	0.0627008	0.000297373	-5.55606	-5.30845	Root	1500g
P25858	Glyceraldehyde-3-phosphate dehydrogenase GAPC1, cytosolic (EC 1.2.1.12) (NAD-dependent glyceraldehydephosphate dehydrogenase C subunit 1)	At3g04120	5	6	0.260874	1.1982	0.0551163	2.21e-06	-5.61155	-5.30921	Root	100kg
Q9M9K1	Probable 2,3-bisphosphoglycerate-independent phosphoglycerate mutase 2 (BPG-independent PGAM 2) (Phosphoglyceromutase 2) (EC 5.4.2.12) (PGAM-I 2)	At3g08590	1	1	0.262945	1.19993	0.12836	0.0405123	-4.91277	-4.64982	Root	soluble
P48491	Triosephosphate isomerase, cytosolic (TIM) (Triose-phosphate isomerase) (EC 5.3.1.1)	At3g55440	1	1	0.272995	1.20831	0.12836	0.0334378	-5.23485	-4.96185	Root	soluble
P48491	Triosephosphate isomerase, cytosolic (TIM) (Triose-phosphate isomerase) (EC 5.3.1.1)	At3g55440	3	3	0.327715	1.25502	0.0796626	3.89e-05	-5.6768	-5.34908	Shoot	soluble
P25696	Bifunctional enolase 2/transcriptional activator (EC 4.2.1.11) (2-phospho-D-glycerate hydro-lyase 2) (2-phosphoglycerate dehydratase 2) (LOW EXPRESSION OF OSMOTICALLY RESPONSIVE GENES 1)	At2g36530	8	6	0.334564	1.261	0.0536604	4.52e-10	-5.36071	-4.9602	Root	100kg
P25696	Bifunctional enolase 2/transcriptional activator (EC 4.2.1.11) (2-phospho-D-glycerate hydro-lyase 2) (2-phosphoglycerate dehydratase 2) (LOW EXPRESSION OF OSMOTICALLY RESPONSIVE GENES 1)	At2g36530	1	5	0.36186	1.28508	0.132563	0.00633874	-5.74152	-5.38927	Shoot	soluble
Q9LF98	Fructose-bisphosphate aldolase (EC 4.1.2.13)	At3g52930	1	1	0.367772	1.29036	0.154434	0.0172462	-5.63946	-5.27169	Shoot	100kg
P25696	Bifunctional enolase 2/transcriptional activator (EC 4.2.1.11) (2-phospho-D-glycerate hydro-lyase 2) (2-phosphoglycerate dehydratase 2) (LOW EXPRESSION OF OSMOTICALLY RESPONSIVE GENES 1)	At2g36530	3	3	0.455416	1.37118	0.0611855	9.83e-14	-5.52628	-5.02862	Root	1500g
Q9SAJ4	Phosphoglycerate kinase (EC 2.7.2.3)	At1g79550	1	2	0.619649	1.5365	0.13462	4.17e-06	-5.7337	-5.12577	Shoot	soluble
Q1WIQ6	NADP-dependent glyceraldehyde-3-phosphate dehydrogenase (EC 1.2.1.9) (Aldehyde dehydrogenase family 11 member A3) (Glyceraldehyde-3-phosphate dehydrogenase [NADP(+)]) (Non-phosphorylating glyceraldehyde 3-phosphate dehydrogenase) (Triosephosphate dehydrogenase)	At2g24270	1	1	0.930505	1.90594	0.13798	1.54e-11	-5.86506	-4.93455	Shoot	soluble
Q9ZP05	Malate dehydrogenase, glyoxysomal (EC 1.1.1.37) (mbNAD-MDH)	At5g09660	2	3	0.279687	1.21393	0.105791	0.00819906	-5.94444	-5.64616	Shoot	100kg
Q9ZP05	Malate dehydrogenase, glyoxysomal (EC 1.1.1.37) (mbNAD-MDH)	At5g09660	1	1	0.338788	1.26469	0.145875	0.0202085	-5.8722	-5.53341	Shoot	1500g
Q9ZP05	Malate dehydrogenase, glyoxysomal (EC 1.1.1.37) (mbNAD-MDH)	At5g09660	2	1	0.626611	1.54393	0.13462	3.25e-06	-5.91803	-5.2034	Shoot	soluble
P42761	Glutathione S-transferase F10 (atGSTF10) (EC 2.5.1.18) (atGSTF4) (GST class-phi member 10) (Protein EARLY RESPONSE TO DEHYDRATION 13)	At2g30870	2	1	-0.19489	0.873639	0.13462	0.147698	-5.16762	-5.14879	Shoot	soluble
Q9SRY5	Glutathione S-transferase F7 (EC 2.5.1.18) (atGSTF8) (GST class-phi member 7) (Glutathione S-transferase 11)	At1g02920	1	2	0.00252541	1.00175	0.123873	0.983735	-5.81911	-5.82183	Root	soluble
O80852	Glutathione S-transferase F9 (atGSTF9) (EC 2.5.1.18) (atGSTF7) (GST class-phi member 9)	At2g30860	2	4	0.115549	1.08339	0.0875914	0.18711	-5.2765	-5.21626	Root	soluble
O80852_O80852-2	Glutathione S-transferase F9 (atGSTF9) (EC 2.5.1.18) (atGSTF7) (GST class-phi member 9)	At2g30860	1	1	0.190366	1.14105	0.124308	0.12567	-5.38645	-5.19609	Root	100kg
Q9ZRW8	Glutathione S-transferase U19 (atGSTU19) (EC 2.5.1.18) (GST class-tau member 19) (Glutathione S-transferase 8)	At1g78380	6	4	0.128858	1.09343	0.0626933	0.0398438	-5.42204	-5.29823	Root	soluble
O80852	Glutathione S-transferase F9 (atGSTF9) (EC 2.5.1.18) (atGSTF7) (GST class-phi member 9)	At2g30860	3	3	0.215745	1.1613	0.0796626	0.00676433	-5.38262	-5.16688	Shoot	soluble
P42761	Glutathione S-transferase F10 (atGSTF10) (EC 2.5.1.18) (atGSTF4) (GST class-phi member 10) (Protein EARLY RESPONSE TO DEHYDRATION 13)	At2g30870	4	3	0.295873	1.22763	0.072825	4.85e-05	-5.37835	-5.12425	Root	soluble
P46422	Glutathione S-transferase F2 (atGSTF2) (EC 2.5.1.18) (24 kDa auxin-binding protein) (atPM24) (GST class-phi member 2)	At4g02520	2	3	0.301742	1.23263	0.0886617	0.000665772	-6.24419	-5.87274	Root	soluble
Q8L7C9	Glutathione S-transferase U20 (atGSTU20) (EC 2.5.1.18) (FIN219-interacting protein 1) (GST class-tau member 20)	At1g78370	1	1	0.393329	1.31342	0.13798	0.00436332	-5.49844	-5.10511	Shoot	soluble
Q94BY2	At1g65820/F1E22_4 (Glutathione-s-transferase, putative) (MAPEG-like protein) (Putative glutathione S-transferase)	At1g65820	1	1	0.437019	1.3538	0.124308	0.000438763	-5.41393	-4.97691	Root	100kg
Q9ZRW8	Glutathione S-transferase U19 (atGSTU19) (EC 2.5.1.18) (GST class-tau member 19) (Glutathione S-transferase 8)	At1g78380	2	1	0.810841	1.75423	0.13462	1.71e-09	-5.99994	-5.14028	Shoot	soluble
O80998	Jacalin-related lectin 20 (Myrosinase-binding protein-like At2g25980)	At2g25980	2	2	-0.0193797	0.986657	0.0835495	0.816574	-5.0842	-5.17773	Root	1500g
O04310	Jacalin-related lectin 34	At3g16460	5	9	0.192739	1.14293	0.039478	1.05e-06	-5.04802	-4.85975	Root	1500g
O04310	Jacalin-related lectin 34	At3g16460	10	7	0.209056	1.15593	0.0462574	6.2e-06	-5.14283	-4.9056	Root	100kg
O04309	Jacalin-related lectin 35 (JA-responsive protein 1) (Myrosinase-binding protein-like At3g16470)	At3g16470	1	1	0.252685	1.19142	0.124308	0.0420803	-5.00659	-4.75391	Root	100kg
Q39085	Delta(24)-sterol reductase (EC 1.3.1.72) (Cell elongation protein DIMINUTO) (Cell elongation protein Dwarf1) (Protein CABBAGE1) (Protein ENHANCED VERY-LOW-FLUENCE RESPONSE 1)	At3g19820	5	4	0.298708	1.23004	0.0615149	1.2e-06	-5.20527	-4.9083	Root	100kg
O04311	Jacalin-related lectin 33	At3g16450	1	3	0.329239	1.25635	0.0874763	0.000167385	-4.85914	-4.54274	Root	1500g
O04310	Jacalin-related lectin 34	At3g16460	10	6	0.696104	1.62012	0.0664818	1.18e-25	-6.7095	-6.02941	Shoot	1500g
O04311	Jacalin-related lectin 33	At3g16450	1	1	0.728899	1.65737	0.145875	5.83e-07	-6.45332	-5.72442	Shoot	1500g
Q38882	Phospholipase D alpha 1 (atPLDalpha1) (PLD alpha 1) (EC 3.1.4.4) (Choline phosphatase 1) (PLDalpha) (Phosphatidylcholine-hydrolyzing phospholipase D 1)	At3g15730	2	1	0.0913343	1.06536	0.123873	0.460927	-5.14623	-5.02747	Root	soluble
Q8L7S1	At1g45200 (At1g45200/At1g45200) (Triacylglycerol lipase-like 1)	At1g45201	2	1	0.187445	1.13875	0.121087	0.121617	-5.43667	-5.24445	Root	100kg
Q8LPS1	Long chain acyl-CoA synthetase 6, peroxisomal (EC 6.2.1.3)	At3g05970	1	1	0.200409	1.14902	0.274785	0.465801	-5.57078	-5.37037	Root	100kg
Q9T0A0	Long chain acyl-CoA synthetase 4 (EC 6.2.1.3)	At4g23850	1	1	0.249506	1.1888	0.124308	0.0447333	-5.3362	-5.0867	Root	100kg
Q38882	Phospholipase D alpha 1 (atPLDalpha1) (PLD alpha 1) (EC 3.1.4.4) (Choline phosphatase 1) (PLDalpha) (Phosphatidylcholine-hydrolyzing phospholipase D 1)	At3g15730	2	1	0.278641	1.21305	0.13462	0.0384675	-5.77984	-5.37808	Shoot	soluble
B9DGD6_B9DGD6-2	Acetyl-coenzyme A synthetase, chloroplastic/glyoxysomal (EC 6.2.1.1) (Acetate--CoA ligase) (Acetyl-CoA synthetase)	At5g36880	1	1	0.28149	1.21545	0.13798	0.0413421	-6.17042	-5.88893	Shoot	soluble
Q9C5Y0_Q9C5Y0-2	Phospholipase D delta (atPLDdelta) (PLD delta) (EC 3.1.4.4)	At4g35790	1	1	0.34333	1.26868	0.124308	0.00574632	-6.04332	-5.69999	Root	100kg
Q9LSQ5	NAD(P)H dehydrogenase (quinone) FQR1 (EC 1.6.5.2) (Flavodoxin-like quinone reductase 1)	At5g54500	1	1	0.351705	1.27607	0.124308	0.00466505	-6.11847	-5.76676	Root	100kg
Q9SLA8	Enoyl-[acyl-carrier-protein] reductase [NADH], chloroplastic (ENR) (EC 1.3.1.9) (NADH-dependent enoyl-ACP reductase 1) (Protein MOSAIC DEATH 1)	At2g05990	2	1	0.416483	1.33467	0.123873	0.0007733	-5.8983	-5.32168	Root	soluble
Q9LX13	(3R)-hydroxymyristoyl-[acyl carrier protein] dehydratase-like protein (At5g10160) (Putative 3-hydroxyacyl-[acyl-carrier-protein] dehydratase) (Putative uncharacterized protein At5g10160)	At5g10160	1	1	0.51545	1.42944	0.0898525	9.66e-09	-6.02842	-5.51297	Root	1500g
O22832	Acyl-[acyl-carrier-protein] desaturase 7, chloroplastic (EC 1.14.19.2) (Protein FATTY ACID BIOSYNTHESIS 2) (Protein SUPPRESSOR OF SA INSENSITIVITY 2) (atSSI2) (Stearoyl-ACP desaturase 7)	At2g43710	1	1	0.635169	1.55312	0.13798	4.16e-06	-4.72022	-4.08505	Shoot	soluble
Q9SZ11	Glycerophosphodiester phosphodiesterase GDPDL3 (EC 3.1.4.46) (Glycerophosphodiester phosphodiesterase-like 3) (ATGDPDL3) (Glycerophosphodiesterase-like 2) (Protein MUTANT ROOT HAIR 5) (Protein SHAVEN 3)	At4g26690	1	2	0.847391	1.79924	0.121087	2.59e-12	-5.95437	-5.16548	Root	100kg
Q42525	Hexokinase-1 (EC 2.7.1.1) (Protein GLUCOSE INSENSITIVE 2)	At4g29130	1	2	0.0986975	1.07081	0.121087	0.415017	-5.5647	-5.54895	Root	100kg
Q42525	Hexokinase-1 (EC 2.7.1.1) (Protein GLUCOSE INSENSITIVE 2)	At4g29130	1	1	0.1328	1.09642	0.154434	0.389839	-5.83423	-5.70143	Shoot	100kg
Q43348	Acid beta-fructofuranosidase 3, vacuolar (at beta fruct3) (atBETAFRUCT3) (EC 3.2.1.26) (Acid invertase 3) (AI 3) (Acid sucrose hydrolase 3) (Vacuolar invertase 3) (Inv-V3) (VAC-INV 3) (VI 3)	At1g62660	2	2	0.138059	1.10042	0.113687	0.224606	-6.12881	-6.12073	Root	soluble
Q9MAQ0	Probable granule-bound starch synthase 1, chloroplastic/amyloplastic (EC 2.4.1.242) (Granule-bound starch synthase I) (GBSS-I)	At1g32900	3	1	-0.311628	0.805732	0.139862	0.0258726	-5.95155	-6.22217	Shoot	1500g
Q9SID0	Probable fructokinase-1 (EC 2.7.1.4)	At2g31390	4	3	0.20048	1.14908	0.072825	0.00590706	-5.18743	-4.98766	Root	soluble
Q9SID0	Probable fructokinase-1 (EC 2.7.1.4)	At2g31390	1	1	0.264887	1.20154	0.124308	0.0330986	-6.10156	-5.83667	Root	100kg
Q8RXD9	4-alpha-glucanotransferase DPE2 (EC 2.4.1.25) (Amylomaltase) (Disproportionating enzyme) (D-enzyme) (Protein DISPROPORTIONATING ENZYME 2)	At2g40840	1	1	0.474341	1.38928	0.145875	0.00114718	-6.13256	-5.65822	Shoot	1500g
Q9SJ12	Probable ATP synthase 24 kDa subunit, mitochondrial	At2g21870	5	8	0.172626	1.12711	0.0545154	0.00154252	-5.51762	-5.36152	Root	100kg
Q9SJ12	Probable ATP synthase 24 kDa subunit, mitochondrial	At2g21870	3	3	0.223467	1.16754	0.0891627	0.0122007	-6.10996	-5.88649	Shoot	100kg
Q9SJ12	Probable ATP synthase 24 kDa subunit, mitochondrial	At2g21870	2	1	0.0571136	1.04038	0.141389	0.686251	-6.2	-6.12008	Shoot	1500g
Q9FLX7	Probable NADH dehydrogenase [ubiquinone] 1 alpha subcomplex subunit 5, mitochondrial	At5g52840	1	2	-0.14691	0.903183	0.0880764	0.0953196	-5.81561	-5.95682	Root	1500g
Q9FLX7	Probable NADH dehydrogenase [ubiquinone] 1 alpha subcomplex subunit 5, mitochondrial	At5g52840	3	3	-0.124865	0.91709	0.0717695	0.0818937	-5.61612	-5.74098	Root	100kg
O22769	NADH dehydrogenase [ubiquinone] flavoprotein 2, mitochondrial (EC 1.6.5.3) (EC 1.6.99.3)	At4g02580	1	1	-0.111808	0.925427	0.124308	0.368416	-5.46834	-5.58014	Root	100kg
Q9SKC9	NADH dehydrogenase [ubiquinone] 1 beta subcomplex subunit 7	At2g02050	2	2	-0.0778614	0.947461	0.0878994	0.375724	-5.67915	-5.75701	Root	100kg
Q9C6B3	Gamma carbonic anhydrase 2, mitochondrial (atCA2) (GAMMA CA2) (EC 4.2.1.-) (Transcription factor APFI)	At1g47260	1	1	-0.0694121	0.953026	0.0898525	0.439811	-5.60544	-5.67485	Root	1500g
Q9SUU5	Cytochrome b-c1 complex subunit 7-1 (Complex III subunit VII)	At4g32470	1	1	-0.0640718	0.956561	0.154434	0.67823	-5.89779	-5.96186	Shoot	100kg
Q95748	NADH dehydrogenase [ubiquinone] iron-sulfur protein 3 (EC 1.6.5.3) (EC 1.6.99.3) (NADH dehydrogenase subunit 9)	atmg00070	1	2	-0.0475712	0.967564	0.121087	0.694416	-5.61167	-5.5676	Root	100kg
Q96251	ATP synthase subunit O, mitochondrial (Oligomycin sensitivity conferral protein) (OSCP)	At5g13450	1	2	-0.0460384	0.968592	0.123873	0.710147	-4.8034	-4.99893	Root	soluble
Q9FNN5	NADH dehydrogenase [ubiquinone] flavoprotein 1, mitochondrial (EC 1.6.5.3) (EC 1.6.99.3)	At5g08530	4	4	-0.0222718	0.984681	0.0694401	0.748412	-5.36606	-5.36587	Root	100kg
Q96251	ATP synthase subunit O, mitochondrial (Oligomycin sensitivity conferral protein) (OSCP)	At5g13450	1	1	-0.019267	0.986734	0.154434	0.900715	-6.26801	-6.28728	Shoot	100kg
P93306	NADH dehydrogenase [ubiquinone] iron-sulfur protein 2 (EC 1.6.5.3) (EC 1.6.99.3) (NADH dehydrogenase subunit 7)	atmg00510	3	2	0.0236745	1.01655	0.0863873	0.784045	-5.48106	-5.39585	Root	100kg
Q9SK66	NADH dehydrogenase [ubiquinone] 1 alpha subcomplex subunit 9, mitochondrial	At2g20360	5	4	0.0309688	1.0217	0.0615149	0.614658	-5.41917	-5.39077	Root	100kg
Q9C6B3	Gamma carbonic anhydrase 2, mitochondrial (atCA2) (GAMMA CA2) (EC 4.2.1.-) (Transcription factor APFI)	At1g47260	5	5	0.034168	1.02397	0.0555924	0.538809	-5.65262	-5.61845	Root	100kg
Q9SSB8	Cytochrome c oxidase subunit 5b-2, mitochondrial (atCOX5b-2)	At1g80230	1	1	0.0362035	1.02541	0.124308	0.770868	-5.78231	-5.7461	Root	100kg
Q94AU7	Gamma carbonic anhydrase 3, mitochondrial (atCA3) (GAMMA CA3) (EC 4.2.1.-)	At5g66510	3	3	0.0481845	1.03396	0.0717695	0.501979	-5.71951	-5.67133	Root	100kg
Q9SK66	NADH dehydrogenase [ubiquinone] 1 alpha subcomplex subunit 9, mitochondrial	At2g20360	1	1	0.0551089	1.03894	0.227079	0.808248	-5.53179	-5.47668	Root	1500g
P83483_P83484_Q9C5A9	ATP synthase subunit beta-1/2/3, mitochondrial (EC 3.6.3.14)	At5g08670,At5g08690,At5g08680	6	8	0.0602325	1.04263	0.0514951	0.242132	-5.41734	-5.35228	Root	soluble
Q9FGI6	NADH dehydrogenase [ubiquinone] iron-sulfur protein 1, mitochondrial (EC 1.6.5.3) (EC 1.6.99.3) (Protein EMBRYO DEFECTIVE 1467)	At5g37510	6	4	0.0888849	1.06355	0.061085	0.145641	-5.26707	-5.17404	Root	100kg
P83483_P83484_Q9C5A9	ATP synthase subunit beta-1/2/3, mitochondrial (EC 3.6.3.14)	At5g08670,At5g08690,At5g08680	6	5	0.0955868	1.0685	0.0645754	0.13881	-6.05006	-6.02023	Shoot	1500g
Q9FGI6	NADH dehydrogenase [ubiquinone] iron-sulfur protein 1, mitochondrial (EC 1.6.5.3) (EC 1.6.99.3) (Protein EMBRYO DEFECTIVE 1467)	At5g37510	1	1	0.122421	1.08856	0.154434	0.427949	-5.68256	-5.56014	Shoot	100kg
Q9FLB7_Q9SG91	Putative cytochrome b-c1 complex, subunit 8 protein (Putative ubiquinol-cytochrome C reductase complex ubiquinone-binding protein (QP-C))	At3g10860,At5g05370	1	1	0.139462	1.10149	0.124308	0.261904	-5.26566	-5.1262	Root	100kg
Q94JS0_Q9LYR2	Cytochrome b-c1 complex subunit Rieske, mitochondrial (EC 1.10.2.2)	At5g13430,At5g13440	1	2	0.169482	1.12465	0.121087	0.161612	-5.80664	-5.46778	Root	100kg
P83483_P83484_Q9C5A9	ATP synthase subunit beta-1/2/3, mitochondrial (EC 3.6.3.14)	At5g08670,At5g08690,At5g08680	5	2	0.170617	1.12554	0.0947082	0.0716242	-6.03637	-5.89249	Shoot	soluble
Q945M1	NADH dehydrogenase [ubiquinone] 1 beta subcomplex subunit 9 (B22 subunit of eukaryotic mitochondrial complex I) (Complex I-B22) (atCIB22) (CI-B22) (NADH-ubiquinone oxidoreductase B22 subunit)	At4g34700	3	2	-0.278974	0.824177	0.0863873	0.00124076	-5.8114	-6.11349	Root	100kg
P92549	ATP synthase subunit alpha, mitochondrial	atmg01190	7	7	0.134282	1.09755	0.0551355	0.0148713	-6.18773	-6.05345	Shoot	1500g
P92549	ATP synthase subunit alpha, mitochondrial	atmg01190	6	5	0.178422	1.13165	0.0567435	0.0016645	-5.54583	-5.37753	Root	soluble
Q9LK29	Cytochrome c1 1, heme protein, mitochondrial (Complex III subunit 4-1) (Complex III subunit IV-1) (Cytochrome b-c1 complex subunit 4-1) (Ubiquinol-cytochrome-c reductase complex cytochrome c1 subunit 1) (Cytochrome c-1 1)	At3g27240	2	2	0.199504	1.1483	0.0878994	0.0232264	-5.39337	-5.19386	Root	100kg
Q9FT52	ATP synthase subunit d, mitochondrial (ATPase subunit d)	At3g52300	1	1	0.200664	1.14923	0.0898525	0.0255314	-5.71483	-5.51416	Root	1500g
Q9SUU5	Cytochrome b-c1 complex subunit 7-1 (Complex III subunit VII)	At4g32470	2	2	0.230044	1.17287	0.113258	0.0422404	-5.25088	-4.99787	Root	100kg
P92549	ATP synthase subunit alpha, mitochondrial	atmg01190	7	8	0.247104	1.18682	0.0576939	1.84e-05	-6.07825	-5.84412	Shoot	100kg
Q96252	ATP synthase subunit delta', mitochondrial (F-ATPase delta' subunit)	At5g47030	1	1	0.25046	1.18959	0.124308	0.0439226	-5.59417	-5.34371	Root	100kg
Q9FT52	ATP synthase subunit d, mitochondrial (ATPase subunit d)	At3g52300	7	8	0.251959	1.19082	0.0466827	6.77e-08	-5.56612	-5.34742	Root	100kg
P92549	ATP synthase subunit alpha, mitochondrial	atmg01190	3	3	0.272237	1.20768	0.0518763	1.54e-07	-5.80726	-5.53502	Root	1500g
P92549	ATP synthase subunit alpha, mitochondrial	atmg01190	9	8	0.286181	1.21941	0.0436991	5.8e-11	-5.63325	-5.35173	Root	100kg
Q96250	ATP synthase subunit gamma, mitochondrial (F-ATPase gamma subunit)	At2g33040	1	2	0.30467	1.23514	0.121087	0.0118653	-5.50092	-4.94572	Root	100kg
P92549	ATP synthase subunit alpha, mitochondrial	atmg01190	1	1	0.307322	1.23741	0.13798	0.0259274	-5.94698	-5.63966	Shoot	soluble
Q96251	ATP synthase subunit O, mitochondrial (Oligomycin sensitivity conferral protein) (OSCP)	At5g13450	4	4	0.308999	1.23885	0.0694401	8.59e-06	-5.60529	-5.25008	Root	100kg
Q9LXJ2	Putative ubiquinol-cytochrome c reductase subunit 9 (Putative uncharacterized protein At3g52730) (Ubiquinol--cytochrome-c reductase-like protein)	At3g52730	2	1	0.325206	1.25284	0.121087	0.0072372	-5.54676	-5.16579	Root	100kg
P93303	ATP synthase protein YMF19 (EC 3.6.3.14) (Mitochondrial protein YMF19)	atmg00480	1	1	0.350833	1.2753	0.124308	0.00476837	-5.69455	-5.34372	Root	100kg
Q9SN96	Putative uncharacterized protein At3g46430/F18L15_150 (Putative uncharacterized protein F18L15.150) (Putative uncharacterized protein MTH12.17)	At3g46430,At5g59613	1	2	0.371921	1.29408	0.121087	0.00212966	-5.5721	-5.21445	Root	100kg
P83483_P83484_Q9C5A9	ATP synthase subunit beta-1/2/3, mitochondrial (EC 3.6.3.14)	At5g08670,At5g08690,At5g08680	7	6	0.373434	1.29543	0.0393064	2.09e-21	-5.97546	-5.63785	Root	1500g
Q96251	ATP synthase subunit O, mitochondrial (Oligomycin sensitivity conferral protein) (OSCP)	At5g13450	2	2	0.381609	1.30279	0.0635353	1.9e-09	-6.01003	-5.62842	Root	1500g
Q9FLX7	Probable NADH dehydrogenase [ubiquinone] 1 alpha subcomplex subunit 5, mitochondrial	At5g52840	1	2	0.395952	1.31581	0.147141	0.00712449	-6.1029	-5.72771	Shoot	100kg
P83483_P83484_Q9C5A9	ATP synthase subunit beta-1/2/3, mitochondrial (EC 3.6.3.14)	At5g08670,At5g08690,At5g08680	10	7	0.421623	1.33943	0.0567328	1.07e-13	-6.11546	-5.6686	Shoot	100kg
P83483_P83484_Q9C5A9	ATP synthase subunit beta-1/2/3, mitochondrial (EC 3.6.3.14)	At5g08670,At5g08690,At5g08680	7	7	0.424666	1.34226	0.0499048	1.75e-17	-5.74473	-5.33996	Root	100kg
Q9M0D5	At4g29480/F17A13_300 (ATP synthase subunit G protein) (Copia-like retroelement pol polyprotein) (Putative uncharacterized protein At4g29480) (Putative uncharacterized protein At4g29480)	At4g29480	1	1	0.440293	1.35688	0.124308	0.000397194	-5.88838	-5.44809	Root	100kg
Q9LHI0	NADH dehydrogenase [ubiquinone] 1 alpha subcomplex subunit 6	At3g12260	2	3	0.45658	1.37228	0.0863873	1.26e-07	-5.2839	-4.74627	Root	100kg
Q96250	ATP synthase subunit gamma, mitochondrial (F-ATPase gamma subunit)	At2g33040	1	1	0.539449	1.45342	0.145875	0.00021728	-6.53486	-5.99541	Shoot	1500g
Q9SK66	NADH dehydrogenase [ubiquinone] 1 alpha subcomplex subunit 9, mitochondrial	At2g20360	1	1	0.598357	1.51399	0.154434	0.000106842	-5.74955	-5.15119	Shoot	100kg
Q9LUT2	S-adenosylmethionine synthase 4 (AdoMet synthase 4) (EC 2.5.1.6) (Methionine adenosyltransferase 4) (MAT 4)	At3g17390	1	2	-0.0918161	0.938341	0.123873	0.458565	-4.72	-4.76768	Root	soluble
Q9LUT2	S-adenosylmethionine synthase 4 (AdoMet synthase 4) (EC 2.5.1.6) (Methionine adenosyltransferase 4) (MAT 4)	At3g17390	2	2	0.158492	1.11612	0.0975664	0.104279	-5.5859	-5.42741	Shoot	soluble
Q94BT9	Copper transport protein ATX1 (Copper chaperone ATX1)	At1g66240	1	1	0.191354	1.14184	0.12836	0.136025	-4.71601	-4.52465	Root	soluble
Q1H583	GDSL esterase/lipase 22 (EC 3.1.1.-) (Extracellular lipase At1g54000) (GDSL esterase/lipase At1g54000)	At1g54000	5	7	-0.215662	0.861151	0.0397313	5.7e-08	-5.8641	-6.10116	Root	1500g
Q1H583	GDSL esterase/lipase 22 (EC 3.1.1.-) (Extracellular lipase At1g54000) (GDSL esterase/lipase At1g54000)	At1g54000	4	4	-0.166696	0.890881	0.0621542	0.00731904	-5.98381	-6.15051	Root	100kg
Q9ZVA4_Q9ZVA5	Curculin-like (Mannose-binding) lectin family protein (F9K20.10 protein) (Strong similarity to glycoprotein EP1)	At1g78850,At1g78860	1	1	-0.809967	0.570395	0.0898525	1.98e-19	-7.03107	-7.84104	Root	1500g
Q9LTQ5	At3g20370/MQC12_13 (Genomic DNA, chromosome 3, P1 clone: MQC12) (TRAF-like family protein)	At3g20370	2	2	-0.051608	0.96486	0.103149	0.616847	-7.97573	-8.02734	Shoot	1500g
Q94K78	Putative uncharacterized protein At2g40765 (Ubiquinol--cytochrome-c reductase) (Uncharacterized protein)	At2g40765	1	1	-0.034398	0.976439	0.124308	0.781999	-5.45575	-5.49014	Root	100kg
Q9SD78	Putative uncharacterized protein At5g08060 (Putative uncharacterized protein At5g08060/F13G24_260) (Putative uncharacterized protein F13G24.260) (Uncharacterized protein)	At5g08060	2	2	-0.000304054	0.999789	0.0878994	0.99724	-5.15691	-5.15721	Root	100kg
Q9SA73	Obg-like ATPase 1	At1g30580	1	1	0.0138871	1.00967	0.12836	0.913846	-4.71772	-4.70383	Root	soluble
O65502	At4g35250/F23E12_190 (At4g35250/F23E12_190) (Putative uncharacterized protein At4g35250) (Putative uncharacterized protein F23E12.190) (Rossmann-fold NAD(P)-binding domain-containing protein)	At4g35250	1	1	0.0632702	1.04483	0.154434	0.682033	-6.37254	-6.30927	Shoot	100kg
Q9SD79	Putative uncharacterized protein F13G24.250 (Uncharacterized protein)	At5g08050	1	1	0.0961705	1.06893	0.145875	0.509724	-6.2771	-6.18093	Shoot	1500g
Q94AL6	Putative uncharacterized protein At4g20150 (Uncharacterized protein)	At4g20150	1	1	0.107775	1.07757	0.124308	0.385943	-5.89435	-5.78658	Root	100kg
Q8VZ57	Putative hydrolase (Putative uncharacterized protein At1g52510)	At1g52510	1	1	0.117216	1.08464	0.154434	0.447851	-6.17653	-6.05931	Shoot	100kg
Q8L7U4	At4g02450/T14P8_5 (At4g02450/T14P8_5) (HSP20-like chaperone)	At4g02450	1	1	0.154368	1.11293	0.12836	0.229127	-4.96734	-4.81298	Root	soluble
Q9SIE7	Expressed protein (PLAT-plant-stress domain-containing protein) (Putative uncharacterized protein At2g22170)	At2g22170	2	2	0.163984	1.12038	0.0907645	0.0708088	-6.31379	-6.14981	Root	soluble
Q949S7	NAD(P)-binding Rossmann-fold superfamily protein (Putative uncharacterized protein At5g15910)	At5g15910	1	1	0.18903	1.14	0.124308	0.128347	-5.6548	-5.46577	Root	100kg
Q9SD66	Putative uncharacterized protein At3g47070 (Putative uncharacterized protein F13I12.120) (Uncharacterized protein)	At3g47070	1	1	0.209383	1.15619	0.145875	0.151184	-5.95514	-5.74575	Shoot	1500g
Q9SD66	Putative uncharacterized protein At3g47070 (Putative uncharacterized protein F13I12.120) (Uncharacterized protein)	At3g47070	2	1	0.22369	1.16772	0.147141	0.128451	-5.98354	-5.70092	Shoot	100kg
F4KIB2_Q9C5N2	Transmembrane 9 superfamily member 8 (Endomembrane protein 1)(atTMN8)/ Transmembrane 9 superfamily member 9 (Endomembrane protein 2)(atTMN9)	At5g10840,At5g25100	1	1	0.238738	1.17996	0.154434	0.122133	-5.45833	-5.2196	Shoot	100kg
Q9ZVL6	UPF0603 protein At1g54780, chloroplastic (Thylakoid lumen 18.3 kDa protein)	At1g54780	1	2	0.240677	1.18155	0.147141	0.101905	-6.15911	-5.89517	Shoot	100kg
Q941A6	Succinate dehydrogenase subunit 6, mitochondrial	At1g08480	1	1	0.242359	1.18293	0.124308	0.051217	-5.10458	-4.86222	Root	100kg
Q93Z83	At5g26280/T19G15_130 (At5g26280/T19G15_130) (TRAF-like family protein)	At5g26280	4	2	-0.449046	0.732527	0.099977	7.07e-06	-8.47156	-9.02365	Shoot	1500g
Q9LTQ5	At3g20370/MQC12_13 (Genomic DNA, chromosome 3, P1 clone: MQC12) (TRAF-like family protein)	At3g20370	5	5	0.245724	1.18569	0.044072	2.47e-08	-6.32017	-5.99263	Root	1500g
Q9S791	At1g70770 protein (At1g70770) (F15H11.2 protein) (Putative uncharacterized protein At1g70770) (Putative uncharacterized protein F5A18.5) (Uncharacterized protein)	At1g70770	2	1	0.256315	1.19442	0.0880764	0.00361257	-4.75219	-4.41519	Root	1500g
Q9SD79	Putative uncharacterized protein F13G24.250 (Uncharacterized protein)	At5g08050	1	1	0.315804	1.24471	0.154434	0.0408637	-6.11533	-5.79952	Shoot	100kg
Q8L7U4	At4g02450/T14P8_5 (At4g02450/T14P8_5) (HSP20-like chaperone)	At4g02450	1	1	0.335246	1.26159	0.13798	0.0151124	-5.66399	-5.32874	Shoot	soluble
Q9ZVL6	UPF0603 protein At1g54780, chloroplastic (Thylakoid lumen 18.3 kDa protein)	At1g54780	3	1	0.355817	1.27971	0.139862	0.0109571	-6.4588	-5.88359	Shoot	1500g
F4J9G2	Rhodanese/cell cycle control phosphatase superfamily protein	At3g59780	1	1	0.361369	1.28464	0.145875	0.0132398	-6.57355	-6.21219	Shoot	1500g
Q9SD66	Putative uncharacterized protein At3g47070 (Putative uncharacterized protein F13I12.120) (Uncharacterized protein)	At3g47070	2	2	0.362767	1.28589	0.0975664	0.000200685	-6.09266	-5.72989	Shoot	soluble
Q941A6	Succinate dehydrogenase subunit 6, mitochondrial	At1g08480	1	1	0.368746	1.29123	0.0898525	4.06e-05	-5.76645	-5.3977	Root	1500g
Q9M815	Protein PLANT CADMIUM RESISTANCE 8 (atPCR8)	At1g52200	1	1	0.385236	1.30607	0.124308	0.00194151	-5.63686	-5.25163	Root	100kg
Q9SRH6	Hypersensitive-induced response protein 3 (atHIR3)	At3g01290	1	1	0.387326	1.30797	0.124308	0.00183417	-5.28354	-4.89622	Root	100kg
Q940G0	Transmembrane 9 superfamily member 1 (Endomembrane protein 12) (Transmembrane nine protein 1) (atTMN1)	At1g10950	1	1	0.391741	1.31198	0.124308	0.00162512	-5.08442	-4.69268	Root	100kg
O81493	F9D12.8 protein (Putative uncharacterized protein At5g26260) (TRAF-like family protein)	At5g26260	1	2	0.404168	1.32333	0.0880764	4.46e-06	-5.5401	-5.24618	Root	1500g
B3H4C4_F4HYQ1_Q9C542	Uncharacterized protein	At1g55160	1	1	0.416016	1.33424	0.124308	0.000817971	-5.89027	-5.47426	Root	100kg
Q9SA73	Obg-like ATPase 1	At1g30580	1	1	0.416118	1.33433	0.124308	0.000815546	-5.05923	-4.64311	Root	100kg
O22939	Putative uncharacterized protein At2g41810 (Uncharacterized protein)	At2g41810	1	1	0.418693	1.33672	0.0898525	3.17e-06	-5.79023	-5.37153	Root	1500g
Q9C5N2	Transmembrane 9 superfamily member 9 (Endomembrane protein 2) (Transmembrane nine protein 9) (atTMN9)	At5g25100	2	1	0.419705	1.33765	0.121087	0.000527957	-4.65131	-4.24412	Root	100kg
Q9SA73	Obg-like ATPase 1	At1g30580	1	1	0.421083	1.33893	0.0898525	2.78e-06	-5.27477	-4.85369	Root	1500g
Q93Z11	At5g37360/MNJ8_150 (Uncharacterized protein)	At5g37360	1	1	0.474373	1.38931	0.154434	0.00212859	-5.5726	-5.09822	Shoot	100kg
O81493	F9D12.8 protein (Putative uncharacterized protein At5g26260) (TRAF-like family protein)	At5g26260	2	3	0.474781	1.38971	0.0886617	8.56e-08	-5.7642	-5.35005	Root	soluble
Q93Z83	At5g26280/T19G15_130 (At5g26280/T19G15_130) (TRAF-like family protein)	At5g26280	2	3	0.479771	1.39452	0.0814927	3.93e-09	-5.54255	-4.93071	Root	1500g
Q9ZPZ4	Putative uncharacterized protein At1g09310 (T31J12.3 protein) (Uncharacterized protein)	At1g09310	1	1	0.550384	1.46448	0.13798	6.64e-05	-4.7021	-4.15172	Shoot	soluble
Q94AZ5	At2g45060/T14P1.13 (Uncharacterized protein)	At2g45060	1	1	0.582243	1.49717	0.124308	2.82e-06	-5.62045	-5.03821	Root	100kg
Q94K71	Haloacid dehalogenase-like hydrolase domain-containing protein At3g48420 (EC 3.1.3.-)	At3g48420	1	1	0.584451	1.49947	0.13798	2.28e-05	-6.61918	-6.03473	Shoot	soluble
A8MR02_Q93Z83	TRAF-like family protein	At5g26280	1	2	0.662082	1.58236	0.121087	4.56e-08	-5.79448	-5.18123	Root	100kg
Q93XY5	Tetraspanin-18 (TOM2A homologous protein 2)	At2g20230	1	1	0.671683	1.59293	0.124308	6.54e-08	-5.6356	-4.96392	Root	100kg
F4JRE0	Transmembrane 9 superfamily member 12 (Endomembrane protein 7) (Transmembrane nine protein 12) (atTMN12)	At4g12650	1	1	0.694854	1.61872	0.124308	2.27e-08	-4.77964	-4.08479	Root	100kg
O80934	Uncharacterized protein At2g37660, chloroplastic	At2g37660	2	3	0.768373	1.70335	0.095989	1.2e-15	-6.78337	-5.95762	Shoot	soluble
Q8VY70	Putative uncharacterized protein At1g62780 (Uncharacterized protein)	At1g62780	1	1	0.791635	1.73103	0.314539	0.0118423	-5.1451	-4.35347	Shoot	soluble
Q9FK81	Uncharacterized protein At5g22580	At5g22580	1	1	0.870887	1.82879	0.13798	2.76e-10	-5.03757	-4.16668	Shoot	soluble
Q9FF98	At5g23820/MRO11_14 (MD-2-related lipid recognition domain-containing protein) (Putative ubiquitin-interacting factor 3a)	At5g23820	1	1	1.07712	2.10982	0.13798	5.89e-15	-7.73189	-6.65477	Shoot	soluble
O80503	Expressed protein (Uncharacterized protein)	At2g44640	1	1	1.5948	3.02052	0.254272	3.56e-10	-7.56835	-5.97355	Shoot	100kg
Q9FKV0	Berberine bridge enzyme-like protein (FAD-binding and BBE domain-containing protein)	At5g44380	1	1	1.32885	2.51203	0.0898525	1.72e-49	-7.28312	-5.95427	Root	1500g
Q39161	Ferredoxin--nitrite reductase, chloroplastic (NiR) (EC 1.7.7.1)	At2g15620	2	1	-0.0436793	0.970178	0.121087	0.718303	-5.25723	-5.37247	Root	100kg
Q39161	Ferredoxin--nitrite reductase, chloroplastic (NiR) (EC 1.7.7.1)	At2g15620	2	3	-0.033603	0.976977	0.0886617	0.704686	-5.32031	-5.39396	Root	soluble
Q39161	Ferredoxin--nitrite reductase, chloroplastic (NiR) (EC 1.7.7.1)	At2g15620	2	1	0.275225	1.21018	0.13462	0.0409076	-6.56499	-6.2905	Shoot	soluble
Q9ZNZ7_Q9ZNZ7-2	Ferredoxin-dependent glutamate synthase 1, chloroplastic/mitochondrial (EC 1.4.7.1) (Fd-GOGAT 1)	At5g04140	5	7	0.383047	1.30409	0.0662385	7.35e-09	-6.25553	-5.83713	Shoot	soluble
Q43127	Glutamine synthetase, chloroplastic/mitochondrial (EC 6.3.1.2) (GS2) (Glutamate--ammonia ligase)	At5g35630	4	3	0.560615	1.4749	0.0786987	1.05e-12	-6.28895	-5.69511	Shoot	soluble
Q43127	Glutamine synthetase, chloroplastic/mitochondrial (EC 6.3.1.2) (GS2) (Glutamate--ammonia ligase)	At5g35630	2	1	0.580491	1.49536	0.141389	4.03e-05	-6.39517	-5.98595	Shoot	1500g
Q9SU81	Alkaline-phosphatase-like protein (Nucleotide pyrophosphatase-like protein) (EC 3.6.1.9) (Putative nucleotide pyrophosphatase)	At4g29700	1	1	-0.103912	0.930506	0.12836	0.418207	-5.34536	-5.44927	Root	soluble
Q9M0A7	At4g30530/F17I23_130 (Gamma-glutamyl peptidase 1) (Putative uncharacterized protein At4g30530)	At4g30530	2	2	-0.0341953	0.976576	0.0907645	0.706361	-4.39728	-4.43147	Root	soluble
Q9LVI9	Putative dehydrogenase (Putative dihydropyrimidine dehydrogenase) (Senescencs-related protein dihydroorotate dehydrogenase-like protein)	At3g17810	2	1	0.0855034	1.06106	0.123873	0.490037	-5.60678	-5.37967	Root	soluble
P39207	Nucleoside diphosphate kinase 1 (EC 2.7.4.6) (Nucleoside diphosphate kinase I) (NDK I) (NDP kinase I) (NDPK I)	At4g09320	1	1	0.117552	1.08489	0.12836	0.359774	-5.14959	-5.03204	Root	soluble
Q9LZG0	Adenosine kinase 2 (AK 2) (EC 2.7.1.20) (Adenosine 5'-phosphotransferase 2)	At5g03300	1	1	0.156802	1.11481	0.12836	0.221869	-5.31314	-5.15634	Root	soluble
P39207	Nucleoside diphosphate kinase 1 (EC 2.7.4.6) (Nucleoside diphosphate kinase I) (NDK I) (NDP kinase I) (NDPK I)	At4g09320	2	2	0.229506	1.17243	0.0975664	0.0186575	-5.8416	-5.6121	Shoot	soluble
O49203	Nucleoside diphosphate kinase III, chloroplastic/mitochondrial (NDK III) (NDP kinase III) (NDPK III) (EC 2.7.4.6)	At4g11010	1	1	0.297929	1.22938	0.13798	0.0308328	-6.54323	-6.2453	Shoot	soluble
O64903	Nucleoside diphosphate kinase II, chloroplastic (NDK II) (NDP kinase II) (NDPK II) (NDPK Ia) (EC 2.7.4.6)	At5g63310	1	2	0.39758	1.3173	0.13462	0.00314339	-6.87289	-6.24077	Shoot	soluble
Q9S726	Probable ribose-5-phosphate isomerase 3, chloroplastic (EC 5.3.1.6) (Phosphoriboisomerase 3) (Protein EMBRYO DEFECTIVE 3119)	At3g04790	1	1	0.0872082	1.06231	0.314539	0.781583	-6.29461	-6.2074	Shoot	soluble
Q9SH69	6-phosphogluconate dehydrogenase, decarboxylating 1, chloroplastic (EC 1.1.1.44)	At1g64190	1	2	-0.137473	0.90911	0.123873	0.26709	-5.52552	-5.82509	Root	soluble
Q9FFR3	6-phosphogluconate dehydrogenase, decarboxylating 2, chloroplastic (EC 1.1.1.44)	At5g41670	3	1	-0.133193	0.911811	0.122341	0.276285	-5.98657	-5.92755	Root	soluble
Q9S9P8_Q9S9P8-2_Q9S9P8-3	Ferredoxin--NADP reductase, root isozyme 2, chloroplastic (EC 1.18.1.2) (Root FNR 2) (atRFNR2)	At1g30510	1	1	-0.0371586	0.974573	0.12836	0.772209	-5.60346	-5.64062	Root	soluble
Q9LSV0_Q9LSV0-2	Glyoxylate/succinic semialdehyde reductase 1 (atGLYR1) (atGR1) (SSA reductase 1) (EC 1.1.1.79) (EC 1.1.1.n11) (Gamma-hydroxybutyrate dehydrogenase) (atGHBDH)	At3g25530	1	1	0.100835	1.07239	0.13798	0.464903	-5.89639	-5.79556	Shoot	soluble
Q9FY99	Glucose-6-phosphate 1-dehydrogenase 2, chloroplastic (G6PD2) (G6PDH2) (EC 1.1.1.49)	At5g13110	2	1	0.108956	1.07845	0.123873	0.379088	-5.80843	-5.54185	Root	soluble
Q9LYR4	Aldolase-type TIM barrel family protein (Putative transaldolase) (Transaldolase-like protein)	At5g13420	3	2	0.216309	1.16176	0.0886617	0.0146992	-5.3113	-5.09659	Root	soluble
Q9ZUC1	Quinone oxidoreductase-like protein At1g23740, chloroplastic (EC 1.-.-.-)	At1g23740	1	1	1.30171	2.46521	0.13798	3.94e-21	-6.38332	-5.08161	Shoot	soluble
P24102	Peroxidase 22 (atperox P22) (EC 1.11.1.7) (ATPEa) (Basic peroxidase E)	At2g38380	1	1	-0.193683	0.874371	0.12836	0.131325	-6.05653	-6.25021	Root	soluble
Q43729	Peroxidase 57 (atperox P57) (EC 1.11.1.7) (ATP13a) (PRXR10)	At5g17820	1	1	0.0613104	1.04341	0.0898525	0.495021	-6.61264	-6.55133	Root	1500g
Q9LDN9	Peroxidase 37 (atperox P37) (EC 1.11.1.7) (ATP38)	At4g08770	1	1	0.142404	1.10374	0.12836	0.267255	-5.94345	-5.80105	Root	soluble
Q9SMU8	Peroxidase 34 (atperox P34) (EC 1.11.1.7) (ATPCb)	At3g49120	1	1	0.162458	1.11919	0.12836	0.205641	-5.42474	-5.26228	Root	soluble
Q9LHB9	Peroxidase 32 (atperox P32) (EC 1.11.1.7) (ATP16a) (PRXR3)	At3g32980	2	1	0.382263	1.30338	0.121087	0.00159438	-6.26132	-5.71351	Root	100kg
O04630_O04630-2	Threonine--tRNA ligase, mitochondrial (EC 6.1.1.3) (Threonyl-tRNA synthetase) (ThrRS)	At5g26830	1	1	0.0139503	1.00972	0.12836	0.913456	-4.92098	-4.90703	Root	soluble
O23627_O23627-2	Glycine--tRNA ligase 1, mitochondrial (EC 6.1.1.14) (Diadenosine tetraphosphate synthetase) (AP-4-A synthetase) (Glycyl-tRNA synthetase 1) (GlyRS 1)	At1g29880	1	1	0.114454	1.08257	0.13798	0.406821	-5.5171	-5.40264	Shoot	soluble
F4I116	ATP binding/leucine-tRNA ligases/aminoacyl-tRNA ligases	At1g09620	1	1	0.51057	1.42461	0.13798	0.000215324	-5.38181	-4.87124	Shoot	soluble
A8MSF2_Q9FFJ2	Rubredoxin family protein (putative uncharacterized)	At5g17170	2	1	0.30114	1.23212	0.141389	0.0331821	-5.72098	-5.30659	Shoot	1500g
A8MSF2_Q9FFJ2	Rubredoxin family protein (putative uncharacterized)	At5g17170	2	2	0.403094	1.32234	0.109202	0.000223123	-5.76796	-5.36486	Shoot	100kg
P59232_P59233_P59271	Ubiquitin-40S ribosomal protein S27a-1/ S27a-2/ S27 a-3 [Cleaved into: Ubiquitin; 40S ribosomal protein S27a-1/ S27a-2/ S27a-3]	At1g23410,At2g47110,At3g62250	1	1	0.078636	1.05602	0.154434	0.610621	-5.88182	-5.80318	Shoot	100kg
P59232_P59233_P59271	Ubiquitin-40S ribosomal protein S27a-1/ S27a-2/ S27 a-3 [Cleaved into: Ubiquitin; 40S ribosomal protein S27a-1/ S27a-2/ S27a-3]	At1g23410,At2g47110,At3g62250	1	1	0.132339	1.09607	0.145875	0.364295	-5.90866	-5.77632	Shoot	1500g
P59232_P59233_P59271	Ubiquitin-40S ribosomal protein S27a-1/ S27a-2/ S27 a-3 [Cleaved into: Ubiquitin; 40S ribosomal protein S27a-1/ S27a-2/ S27a-3]	At1g23410,At2g47110,At3g62250	1	1	-0.0710353	0.951955	0.0898525	0.429191	-4.99852	-5.06956	Root	1500g
F4JTK8_Q8S9L3	Aminoacylase-1 (EC 3.5.1.14) (N-acyl-L-amino-acid amidohydrolase)	At4g38220	1	2	-0.0520213	0.964584	0.123873	0.674517	-5.45882	-5.49688	Root	soluble
O64517	Metacaspase-4 (atMC4) (EC 3.4.22.-) (Metacaspase 2d) (atMCP2d) (Metacaspase-7) [Cleaved into: Metacaspase-4 subunit p20; Metacaspase-4 subunit p10]	At1g79340	1	1	0.0339044	1.02378	0.124308	0.78505	-5.16639	-5.13249	Root	100kg
O65390	Aspartic proteinase A1 (EC 3.4.23.-)	At1g11910	1	2	0.106802	1.07684	0.123873	0.388585	-4.99925	-4.92058	Root	soluble
O64517	Metacaspase-4 (atMC4) (EC 3.4.22.-) (Metacaspase 2d) (atMCP2d) (Metacaspase-7) [Cleaved into: Metacaspase-4 subunit p20; Metacaspase-4 subunit p10]	At1g79340	1	1	0.150856	1.11023	0.12836	0.239894	-5.08674	-4.93588	Root	soluble
O65390	Aspartic proteinase A1 (EC 3.4.23.-)	At1g11910	2	2	0.155061	1.11347	0.0635353	0.0146653	-5.72729	-5.57223	Root	1500g
P43297	Cysteine proteinase RD21a (RD21) (EC 3.4.22.-)	At1g47128	3	3	0.196241	1.14571	0.0717695	0.0062509	-6.17001	-5.97377	Root	100kg
P93028	Ubiquitin-activating enzyme E1 1 (atUBA1) (Protein MODIFIER OF SNC1 5)	At2g30110	1	3	0.272667	1.20804	0.122341	0.0258304	-5.05449	-4.76384	Root	soluble
O80860	ATP-dependent zinc metalloprotease FTSH 2, chloroplastic (atFTSH2) (EC 3.4.24.-) (Protein VARIEGATED 2)	At2g30950	8	4	0.29083	1.22334	0.0706944	3.89e-05	-5.30737	-4.96438	Shoot	1500g
Q94B60	ATP-dependent Clp protease proteolytic subunit 4, chloroplastic (EC 3.4.21.92) (Endopeptidase ClpP4) (nClpP4) (nClpP3)	At5g45390	2	2	0.3252	1.25284	0.0975664	0.000858777	-6.35511	-6.02991	Shoot	soluble
Q9SIV2	26S proteasome non-ATPase regulatory subunit 2 homolog A (26S proteasome regulatory subunit RPN1a) (atRPN1a) (26S proteasome regulatory subunit S2 homolog A)	At2g20580	2	2	0.327441	1.25479	0.0878994	0.000195175	-5.33433	-5.00689	Root	100kg
O65390	Aspartic proteinase A1 (EC 3.4.23.-)	At1g11910	2	2	0.358604	1.28218	0.0878994	4.51e-05	-5.45946	-5.10085	Root	100kg
Q9FI56	Chaperone protein ClpC1, chloroplastic (ATP-dependent Clp protease ATP-binding subunit ClpC homolog 1) (Casein lytic proteinase C1) (Protein DE-REGULATED CAO ACCUMULATION 1) (Protein IRON-RESCUED MUTANT 1)	At5g50920	5	3	0.379627	1.30101	0.0858106	9.69e-06	-5.69951	-5.21675	Shoot	100kg
Q9FI56	Chaperone protein ClpC1, chloroplastic (ATP-dependent Clp protease ATP-binding subunit ClpC homolog 1) (Casein lytic proteinase C1) (Protein DE-REGULATED CAO ACCUMULATION 1) (Protein IRON-RESCUED MUTANT 1)	At5g50920	4	2	0.387501	1.30813	0.120576	0.00131019	-5.51012	-5.04395	Shoot	soluble
Q9SEI4	26S protease regulatory subunit 6B homolog (26S protease subunit 6B homolog) (26S proteasome AAA-ATPase subunit RPT3) (Protein BMAA insensitive morphology 409) (Regulatory particle triple-A ATPase subunit 3)	At5g58290	2	1	0.39056	1.3109	0.121087	0.00125772	-5.18339	-4.71344	Root	100kg
Q8GYA6	26S proteasome non-ATPase regulatory subunit 13 homolog B (26S proteasome regulatory subunit RPN9b) (atRNP9b) (26S proteasome regulatory subunit S11 homolog B)	At4g19006	1	1	0.390838	1.31116	0.12836	0.00232795	-5.43139	-5.04055	Root	soluble
O80860	ATP-dependent zinc metalloprotease FTSH 2, chloroplastic (atFTSH2) (EC 3.4.24.-) (Protein VARIEGATED 2)	At2g30950	3	2	0.411413	1.32999	0.12569	0.00106325	-5.31199	-4.87395	Shoot	100kg
Q9FFK3	Probable zinc metalloprotease EGY2, chloroplastic (EC 3.4.24.-) (Protein ETHYLENE-DEPENDENT GRAVITROPISM-DEFICIENT AND YELLOW-GREEN 2)	At5g05740	1	1	0.43081	1.34799	0.154434	0.0052773	-6.66826	-6.23745	Shoot	100kg
O80860	ATP-dependent zinc metalloprotease FTSH 2, chloroplastic (atFTSH2) (EC 3.4.24.-) (Protein VARIEGATED 2)	At2g30950	1	1	0.570876	1.48543	0.13798	3.51e-05	-5.42024	-4.84936	Shoot	soluble
O65390	Aspartic proteinase A1 (EC 3.4.23.-)	At1g11910	1	1	0.674355	1.59588	0.13798	1.02e-06	-4.7183	-4.04395	Shoot	soluble
O04314	PYK10-binding protein 1 (Jacalin-related lectin 30) (Jasmonic acid-induced protein)	At3g16420	4	5	0.138442	1.10072	0.0500546	0.00567813	-4.94016	-4.81862	Root	1500g
O04314	PYK10-binding protein 1 (Jacalin-related lectin 30) (Jasmonic acid-induced protein)	At3g16420	3	3	0.203821	1.15175	0.0741089	0.00595414	-5.09627	-4.89245	Root	soluble
O04314	PYK10-binding protein 1 (Jacalin-related lectin 30) (Jasmonic acid-induced protein)	At3g16420	5	5	0.297729	1.22921	0.0555924	8.53e-08	-5.17007	-4.87234	Root	100kg
O04314	PYK10-binding protein 1 (Jacalin-related lectin 30) (Jasmonic acid-induced protein)	At3g16420	8	4	0.670381	1.59149	0.0706944	2.48e-21	-6.33381	-5.63086	Shoot	1500g
O04314	PYK10-binding protein 1 (Jacalin-related lectin 30) (Jasmonic acid-induced protein)	At3g16420	4	3	0.766391	1.70101	0.0786987	2.07e-22	-6.45525	-5.69333	Shoot	soluble
P28769	T-complex protein 1 subunit alpha (TCP-1-alpha) (CCT-alpha) (Chaperonin CCT1)	At3g20050	2	2	0.214123	1.16	0.0907645	0.0183188	-5.19343	-4.97931	Root	soluble
P29197	Chaperonin CPN60, mitochondrial (HSP60)	At3g23990	1	1	0.560152	1.47442	0.0898525	4.54e-10	-5.81573	-5.25558	Root	1500g
P21238	Chaperonin 60 subunit alpha 1, chloroplastic (CPN-60 alpha 1) (Protein SCHLEPPERLESS) (RuBisCO large subunit-binding protein subunit alpha 1)	At2g28000	5	6	0.612664	1.52908	0.0612096	1.39e-23	-5.90331	-5.27874	Shoot	soluble
O65282	20 kDa chaperonin, chloroplastic (Chaperonin 10) (Ch-CPN10) (Cpn10) (Chaperonin 20) (Protein Cpn21)	At5g20720	6	6	0.661832	1.58209	0.0605522	8.29e-28	-5.9945	-5.29977	Shoot	soluble
Q8S9L5	Trigger factor-like protein TIG, Chloroplastic (EC 5.2.1.8) (Immunophilin TIG) (Peptidyl-prolyl cis-trans isomerase TIG) (PPIase TIG) (Rotamase)	At5g55220	1	1	0.731474	1.66033	0.13798	1.15e-07	-5.90625	-5.17478	Shoot	soluble
P29197	Chaperonin CPN60, mitochondrial (HSP60)	At3g23990	3	2	0.779101	1.71606	0.0863873	1.9e-19	-5.66935	-4.92939	Root	100kg
C0Z361	Chaperonin 60 subunit beta 3, chloroplastic (CPN-60 beta 3)	At5g56500	1	1	0.784503	1.7225	0.124308	2.77e-10	-5.89844	-5.11394	Root	100kg
P21240_Q9LJE4	Chaperonin 60 subunit beta 1/ beta 2, chloroplastic (RuBisCO large subunit-binding protein subunit beta, chloroplastic)	At1g55490,At3g13470	1	1	0.987032	1.9821	0.0898525	4.51e-28	-6.22168	-5.23465	Root	1500g
Q944K2	Dolichyl-diphosphooligosaccharide--protein glycosyltransferase 48 kDa subunit (Oligosaccharyl transferase 48 kDa subunit) (EC 2.4.99.18) (Protein DEFECTIVE GLYCOSYLATION 1)	At5g66680	2	1	0.117581	1.08491	0.237971	0.621236	-5.16387	-5.04629	Root	100kg
Q944K2	Dolichyl-diphosphooligosaccharide--protein glycosyltransferase 48 kDa subunit (Oligosaccharyl transferase 48 kDa subunit) (EC 2.4.99.18) (Protein DEFECTIVE GLYCOSYLATION 1)	At5g66680	1	1	0.305085	1.23549	0.154434	0.0482115	-5.62852	-5.32343	Shoot	100kg
P36397_Q6ID97_Q9LQC8_Q9LYJ3_Q9M1P5	_x000D_ ADP-ribosylation factor 1/ A1F/ 2-A/ A1B/ A1E	At2g47170,At1g10630,At1g23490,At5g14670,At3g62290	1	1	0.387654	1.30826	0.12836	0.00252736	-4.91645	-4.52879	Root	soluble
F4I3M3	Protein kinase protein with tetratricopeptide repeat domain	At1g63500	1	1	0.468503	1.38367	0.124308	0.000163984	-5.71352	-5.24501	Root	100kg
P36397_Q6ID97_Q9LQC8_Q9LYJ3_Q9M1P5	_x000D_ ADP-ribosylation factor 1/ A1F/ 2-A/ A1B/ A1E	At2g47170,At1g10630,At1g23490,At5g14670,At3g62290	2	1	0.51045	1.42449	0.121087	2.49e-05	-5.25902	-4.59254	Root	100kg
P36397_Q6ID97_Q9LQC8_Q9LYJ3_Q9M1P5	_x000D_ ADP-ribosylation factor 1/ A1F/ 2-A/ A1B/ A1E	At2g47170,At1g10630,At1g23490,At5g14670,At3g62290	2	2	0.617132	1.53382	0.109202	1.59e-08	-5.47159	-4.85446	Shoot	100kg
P49204_Q8VYK6_Q93VH9	40S ribosomal protein S4-1/ S4-2/ S4-3	At2g17360,At5g07090,At5g58420	3	1	-0.270129	0.829245	0.139862	0.053433	-5.85626	-6.01083	Shoot	1500g
Q8LC83	40S ribosomal protein S24-2	At5g28060	1	1	-0.206072	0.866894	0.124308	0.0973684	-5.02785	-5.23392	Root	100kg
P42794_P42794-2_P42795	60S ribosomal protein L11-1 (L16A)/ L11-2 (L16)	At2g42740,At3g58700,At4g18730,At5g45775	1	1	-0.200338	0.870346	0.145875	0.169641	-5.51812	-5.71846	Shoot	1500g
Q9FNP8_Q9LF30	40S ribosomal protein S19-2/ S19-3	At5g15520,At5g61170	2	1	-0.161246	0.894252	0.141389	0.254102	-5.66251	-5.87632	Shoot	1500g
Q9FNP8_Q9LF30	40S ribosomal protein S19-2/ S19-3	At5g15520,At5g61170	1	1	-0.138865	0.908233	0.154434	0.368553	-5.67704	-5.81591	Shoot	100kg
P17094	60S ribosomal protein L3-1 (Protein EMBRYO DEFECTIVE 2207)	At1g43170	1	1	-0.133109	0.911864	0.145875	0.361512	-5.76975	-5.90285	Shoot	1500g
Q42112	60S acidic ribosomal protein P0-2	At3g09200	1	1	-0.126742	0.915898	0.12836	0.323451	-5.00011	-5.12685	Root	soluble
P56805	30S ribosomal protein S15, chloroplastic	atcg01120	3	2	-0.126355	0.916143	0.105791	0.232331	-6.08946	-6.2224	Shoot	100kg
Q9M885	40S ribosomal protein S7-2	At3g02560	1	1	-0.10755	0.928163	0.145875	0.460956	-5.82797	-5.93552	Shoot	1500g
Q8RXX5	50S ribosomal protein L19-2, chloroplastic	At5g47190	1	1	-0.0850256	0.942768	0.145875	0.559983	-6.07957	-6.16459	Shoot	1500g
P49201_Q9SF35	40S ribosomal protein S23-1/ S23-2	At3g09680,At5g02960	1	1	-0.0795527	0.946351	0.0898525	0.375957	-4.93737	-5.01692	Root	1500g
Q8LD03	40S ribosomal protein S7-3	At5g16130	1	1	-0.0783569	0.947136	0.0898525	0.383174	-4.95937	-5.03773	Root	1500g
Q9LHG9	Nascent polypeptide-associated complex subunit alpha-like protein 1 (NAC-alpha-like protein 1) (Alpha-NAC-like protein 1)	At3g12390	1	1	-0.0672481	0.954457	0.12836	0.600348	-5.04705	-5.1143	Root	soluble
Q9T029	40S ribosomal protein S25-4	At4g39200	2	2	-0.0648819	0.956024	0.0878994	0.46043	-4.84605	-4.91093	Root	100kg
P49201_Q9SF35	40S ribosomal protein S23-1/ S23-2	At3g09680,At5g02960	1	1	-0.0516353	0.964842	0.124308	0.677864	-4.98567	-5.0373	Root	100kg
P59223	40S ribosomal protein S13-1	At3g60770	1	1	-0.0470469	0.967916	0.124308	0.705082	-4.96318	-5.01023	Root	100kg
P41127	60S ribosomal protein L13-1 (Protein BBC1 homolog)	At3g49010	2	1	-0.0450091	0.969284	0.141389	0.75023	-5.93135	-6.03319	Shoot	1500g
Q42262	40S ribosomal protein S3a-2	At4g34670	2	1	-0.039293	0.973132	0.121087	0.745557	-5.05489	-5.15507	Root	100kg
Q9M8X9	40S ribosomal protein S16-2	At3g04230	1	1	-0.0333829	0.977126	0.124308	0.788277	-5.09093	-5.12431	Root	100kg
P60039	60S ribosomal protein L7-3	At2g44120	1	1	-0.0313419	0.97851	0.124308	0.80094	-5.0982	-5.12954	Root	100kg
Q9M339_Q9SIP7	40S ribosomal protein S3-2/ S7-2	At3g53870,At3g02560	2	2	-0.0284772	0.980455	0.103149	0.782488	-5.69415	-5.72263	Shoot	1500g
P60039	60S ribosomal protein L7-3	At2g44120	1	1	-0.0267617	0.981621	0.0898525	0.765825	-5.12855	-5.15531	Root	1500g
P51427_Q9ZUT9	40S ribosomal protein S5-1/ S5-2	At2g37270,At3g11940	1	2	-0.0205799	0.985836	0.121087	0.865041	-4.99175	-5.01421	Root	100kg
Q9MAB3	Probable nucleolar protein 5-2 (MAR-binding NOP56/58 homolog 2) (Nucleolar protein 58-2)	At3g05060	1	1	-0.0184304	0.987306	0.145875	0.89946	-5.00003	-5.01846	Shoot	1500g
P38666	60S ribosomal protein L24-2 (Protein SHORT VALVE 1)	At3g53020	2	2	-0.0116187	0.991979	0.0635353	0.8549	-5.03908	-5.0507	Root	1500g
Q9T029	40S ribosomal protein S25-4	At4g39200	1	2	-0.0114691	0.992082	0.147141	0.937871	-5.71901	-5.72638	Shoot	100kg
P49690	60S ribosomal protein L23 (Protein EMBRYO DEFECTIVE 2171)	At1g04480,At2g33370,At3g04400	1	1	-0.0101266	0.993005	0.0898525	0.910266	-5.02743	-5.03756	Root	1500g
P51418	60S ribosomal protein L18a-2	At2g34480	1	2	-0.00871413	0.993978	0.0880764	0.921187	-5.11371	-5.01677	Root	1500g
P56801	30S ribosomal protein S8, chloroplastic	atcg00770	1	1	-0.00718259	0.995034	0.154434	0.962905	-5.97454	-5.98172	Shoot	100kg
P17094	60S ribosomal protein L3-1 (Protein EMBRYO DEFECTIVE 2207)	At1g43170	3	2	-0.00447273	0.996905	0.105791	0.966276	-5.88813	-5.65131	Shoot	100kg
P49688	40S ribosomal protein S2-3	At2g41840	2	3	-0.00428659	0.997033	0.0863873	0.960425	-4.98731	-5.05619	Root	100kg
P51413_Q93VI3	60S ribosomal protein L17-1/ L17-2	At1g27400,At1g67430	2	2	-0.00180953	0.998747	0.0878994	0.983576	-4.98993	-4.99174	Root	100kg
P34788	40S ribosomal protein S18	At1g22780,At1g34030,At4g09800	5	3	0.000162526	1.00011	0.0821554	0.998422	-5.75602	-5.72626	Shoot	1500g
Q9SIP7	40S ribosomal protein S3-1	At2g31610	1	1	0.00372104	1.00258	0.124308	0.97612	-4.99907	-4.99534	Root	100kg
P34788	40S ribosomal protein S18	At1g22780,At1g34030,At4g09800	3	3	0.0123634	1.00861	0.0611855	0.839866	-5.03846	-5.09133	Root	1500g
Q9SIH0	40S ribosomal protein S14-1	At2g36160	4	4	0.0134384	1.00936	0.0621542	0.828823	-5.054	-5.04056	Root	100kg
Q08112_Q9FY64	40S ribosomal protein S15-1/ S15-4	At1g04270,At5g09510	1	2	0.0143036	1.00996	0.0880764	0.870991	-4.99335	-5.09674	Root	1500g
P49200	40S ribosomal protein S20-1	At3g45030,At5g62300	1	1	0.0184552	1.01287	0.124308	0.881977	-4.94632	-4.92786	Root	100kg
Q9ASR1	At1g56070/T6H22_13 (Elongation factor EF-2) (Putative elongation factor)	At1g56070	5	8	0.0266089	1.01862	0.0559061	0.634105	-4.79111	-4.76742	Root	soluble
P46286	60S ribosomal protein L8-1 (60S ribosomal protein L2) (Protein EMBRYO DEFECTIVE 2296)	At2g18020	1	1	0.0269328	1.01884	0.154434	0.861554	-5.90312	-5.87618	Shoot	100kg
O65686	At4g34620/T4L20_200 (At4g34620/T4L20_200) (Putative ribosomal protein S16) (Small subunit ribosomal protein 16)	At4g34620	1	1	0.0283757	1.01986	0.154434	0.854218	-6.16226	-6.13389	Shoot	100kg
P60040	60S ribosomal protein L7-2	At2g01250	3	3	0.0298354	1.0209	0.0717695	0.677622	-5.07858	-5.04875	Root	100kg
P51430	40S ribosomal protein S6-2 (Protein EMBRYO DEFECTIVE 3010)	At5g10360	1	2	0.0303162	1.02124	0.147141	0.836763	-5.75976	-5.70571	Shoot	100kg
P49204_Q8VYK6_Q93VH9	40S ribosomal protein S4-1/ S4-2/ S4-3	At2g17360,At5g07090,At5g58420	4	5	0.0349269	1.0245	0.0757796	0.644869	-5.79157	-5.8228	Shoot	100kg
P41127	60S ribosomal protein L13-1 (Protein BBC1 homolog)	At3g49010	1	1	0.0352539	1.02474	0.0898525	0.694798	-5.27278	-5.23753	Root	1500g
Q08112_Q9FY64	40S ribosomal protein S15-1/ S15-4	At1g04270,At5g09510	1	1	0.0375565	1.02637	0.145875	0.796826	-5.68688	-5.64932	Shoot	1500g
P49227_Q8LBI1	60S ribosomal protein L5-1/ L5-2	At3g25520,At5g39740	1	1	0.0443298	1.0312	0.145875	0.761212	-5.71629	-5.67196	Shoot	1500g
Q43291_Q9FDZ9	60S ribosomal protein L21-1/ L21-2	At1g09590,At1g09690,At1g57660,At1g57860	1	1	0.0446464	1.03143	0.0898525	0.619269	-5.12108	-5.07643	Root	1500g
P59223_P59224	40S ribosomal protein S13-1/ S13-2	At3g60770,At4g00100	1	1	0.045459	1.03201	0.0898525	0.612906	-5.03622	-4.99076	Root	1500g
P38666_Q42347	60S ribosomal protein L24-1/ L24-2	At2g36620,At3g53020	1	1	0.0454738	1.03202	0.145875	0.755245	-5.75294	-5.70747	Shoot	1500g
P51430	40S ribosomal protein S6-2 (Protein EMBRYO DEFECTIVE 3010)	At5g10360	1	1	0.0484729	1.03417	0.0898525	0.589561	-5.04357	-4.9951	Root	1500g
P34788	40S ribosomal protein S18	At1g22780,At1g34030,At4g09800	6	6	0.0506732	1.03575	0.0630476	0.421554	-5.7267	-5.67603	Shoot	100kg
Q42340_Q9M8X9	40S ribosomal protein S16-3/ S16-2	At5g18380,At3g04230	1	1	0.0512267	1.03615	0.145875	0.725462	-5.83567	-5.78444	Shoot	1500g
P49200	40S ribosomal protein S20-1	At3g45030,At5g62300	1	1	0.0527428	1.03724	0.0898525	0.557208	-4.99913	-4.94639	Root	1500g
Q9LXG1	40S ribosomal protein S9-1	At5g15200	1	1	0.0538764	1.03805	0.0898525	0.548767	-5.21484	-5.16096	Root	1500g
P60040	60S ribosomal protein L7-2	At2g01250	1	1	0.058171	1.04115	0.0898525	0.517369	-5.1011	-5.04293	Root	1500g
P36210_P36212	50S ribosomal protein L12-1/ L12-3, chloroplastic (CL12-A/ Cl12-C)	At3g27830,At3g27850	2	2	0.0583021	1.04124	0.0975664	0.550131	-6.12604	-6.06774	Shoot	soluble
P49201_Q9SF35	40S ribosomal protein S23-1/ S23-2	At3g09680,At5g02960	1	1	0.0591114	1.04182	0.145875	0.685315	-5.71713	-5.65802	Shoot	1500g
Q9LXG1	40S ribosomal protein S9-1	At5g15200	2	2	0.0597616	1.04229	0.109202	0.584201	-5.91421	-5.85445	Shoot	100kg
Q08112_Q9FY64	40S ribosomal protein S15-1/ S15-4	At1g04270,At5g09510	1	2	0.0613571	1.04345	0.147141	0.676682	-5.70413	-5.71658	Shoot	100kg
Q940B0	60S ribosomal protein L18-3	At5g27850	5	5	0.0614555	1.04352	0.0555924	0.268958	-5.18649	-5.12503	Root	100kg
P49688	40S ribosomal protein S2-3	At2g41840	1	1	0.0636266	1.04509	0.12836	0.620115	-4.94706	-4.88344	Root	soluble
P49204_Q8VYK6_Q93VH9	40S ribosomal protein S4-1/ S4-2/ S4-3	At2g17360,At5g07090,At5g58420	1	2	0.0640549	1.0454	0.0880764	0.467064	-4.96782	-4.92058	Root	1500g
P41127	60S ribosomal protein L13-1 (Protein BBC1 homolog)	At3g49010	2	1	0.0647531	1.04591	0.147141	0.659883	-5.95523	-5.91768	Shoot	100kg
P41377	Eukaryotic initiation factor 4A-2 (eIF-4A-2) (EC 3.6.4.13) (ATP-dependent RNA helicase eIF4A-2) (DEAD-box ATP-dependent RNA helicase 19)	At1g54270	1	2	0.065998	1.04681	0.123873	0.594181	-4.74236	-4.68251	Root	soluble
Q43291_Q9FDZ9	60S ribosomal protein L21-1/ L21-2	At1g09590,At1g09690,At1g57660,At1g57860	2	1	0.0685721	1.04868	0.121087	0.571186	-5.22618	-5.02759	Root	100kg
P42798	40S ribosomal protein S15a-1	At1g07770,At5g59850	1	1	0.0686304	1.04872	0.124308	0.580882	-5.16594	-5.09731	Root	100kg
P17094	60S ribosomal protein L3-1 (Protein EMBRYO DEFECTIVE 2207)	At1g43170	2	2	0.0700337	1.04974	0.0635353	0.27034	-5.11188	-5.04185	Root	1500g
P42792	Cytochrome b (Complex III subunit 3) (Complex III subunit III) (Cytochrome b-c1 complex subunit 3) (Ubiquinol-cytochrome-c reductase complex cytochrome b subunit)	atmg00220	2	2	0.0734003	1.05219	0.0878994	0.40369	-5.41514	-5.34174	Root	100kg
P49206_Q8LPJ7_Q9LYK9	40S ribosomal protein S26-1/ S26-2/ S26-3	At2g40590,At2g40510,At3g56340	1	1	0.0757698	1.05392	0.154434	0.62369	-5.89436	-5.81859	Shoot	100kg
Q43291_Q9FDZ9	60S ribosomal protein L21-1/ L21-2	At1g09590,At1g09690,At1g57660,At1g57860	1	1	0.0764247	1.0544	0.145875	0.600344	-5.90405	-5.82762	Shoot	1500g
Q8LBI1	60S ribosomal protein L5-1	At3g25520	1	1	0.0797615	1.05684	0.0898525	0.374705	-5.16332	-5.08356	Root	1500g
Q9CAV0	40S ribosomal protein S3a-1	At3g04840	2	3	0.0851219	1.06078	0.0863873	0.324451	-4.96138	-4.90189	Root	100kg
Q8LEQ0	60S acidic ribosomal protein P1-3	At5g47700	1	1	0.0864995	1.06179	0.12836	0.500387	-4.97086	-4.88436	Root	soluble
P49204_Q8VYK6_Q93VH9	40S ribosomal protein S4-1/ S4-2/ S4-3	At2g17360,At5g07090,At5g58420	6	6	0.0871669	1.06228	0.0507487	0.0858663	-5.08227	-4.9951	Root	100kg
Q9CAV0	40S ribosomal protein S3a-1	At3g04840	1	1	0.0907772	1.06494	0.0898525	0.312356	-5.11511	-5.02434	Root	1500g
P49205_Q9LZ17_Q9SJ36_Q9SQZ1	40S ribosomal protein S17-1/ S17-2/ S17-3/ S17-4	At2g04390,At2g05220,At3g10610,At5g04800	3	2	0.0917778	1.06568	0.0863873	0.288054	-5.11939	-5.03298	Root	100kg
P51430	40S ribosomal protein S6-2 (Protein EMBRYO DEFECTIVE 3010)	At5g10360	2	2	0.0958731	1.06871	0.103149	0.35265	-5.79897	-5.70309	Shoot	1500g
P36210_P36212	50S ribosomal protein L12-1/ L12-3, chloroplastic (CL12-A/ Cl12-C)	At3g27830,At3g27850	3	3	0.0960698	1.06886	0.0891627	0.281272	-6.13361	-6.03754	Shoot	100kg
P51427	40S ribosomal protein S5-2	At3g11940	1	1	0.0993397	1.07128	0.0898525	0.268905	-4.94105	-4.84171	Root	1500g
P51418	60S ribosomal protein L18a-2	At2g34480	2	1	0.103496	1.07437	0.121087	0.392703	-4.91657	-4.89702	Root	100kg
Q9LXG1	40S ribosomal protein S9-1	At5g15200	2	1	0.105202	1.07565	0.141389	0.456839	-5.89161	-5.63508	Shoot	1500g
Q08112_Q9FY64	40S ribosomal protein S15-1/ S15-4	At1g04270,At5g09510	1	1	0.105529	1.07589	0.124308	0.395922	-5.06314	-4.95761	Root	100kg
P49209	60S ribosomal protein L9-1	At1g33120,At1g33140	3	3	0.10724	1.07717	0.0717695	0.135115	-5.08243	-4.97519	Root	100kg
P51407	60S acidic ribosomal protein P2-1	At2g27720	3	1	0.11099	1.07997	0.122341	0.364291	-5.01656	-4.89676	Root	soluble
P49205_Q9LZ17_Q9SJ36_Q9SQZ1	40S ribosomal protein S17-1/ S17-2/ S17-3/ S17-4	At2g04390,At2g05220,At3g10610,At5g04800	2	2	0.111487	1.08034	0.109202	0.307288	-5.87314	-5.76165	Shoot	100kg
Q9LXG1	40S ribosomal protein S9-1	At5g15200	2	1	0.112407	1.08103	0.121087	0.353242	-5.11425	-5.08423	Root	100kg
O23515_Q8VYF1	60S ribosomal protein L15-1/ L15-2	At4g16720,At4g17390	1	2	0.113103	1.08155	0.123873	0.361215	-5.04834	-4.99715	Root	soluble
P42798	40S ribosomal protein S15a-1	At1g07770,At5g59850	1	1	0.121011	1.0875	0.154434	0.433289	-5.98817	-5.86716	Shoot	100kg
O50061	50S ribosomal protein L4, chloroplastic (CL4) (R-protein L4)	At1g07320	1	1	0.134776	1.09792	0.13798	0.328677	-6.11914	-5.98436	Shoot	soluble
P50883_Q9LFH5	60S ribosomal protein L12-1/ L12-2 (ABI-binding protein 11)	At2g37190,At3g53430	1	1	0.13737	1.0999	0.13798	0.319452	-5.80589	-5.66852	Shoot	soluble
O80626_Q9LZ41	60S ribosomal protein L35-2/ L35-4	At2g39390,At5g02610	1	2	0.138602	1.10084	0.121087	0.252355	-5.10065	-4.98847	Root	100kg
P49227_Q8LBI1	60S ribosomal protein L5-1/ L5-2	At3g25520,At5g39740	1	1	0.139854	1.10179	0.154434	0.365154	-5.77599	-5.63614	Shoot	100kg
P42794_P42794-2_P42795	60S ribosomal protein L11-1 (L16A)/ L11-2 (L16)	At2g42740,At3g58700,At4g18730,At5g45775	1	1	0.142683	1.10396	0.124308	0.251044	-5.20831	-5.06562	Root	100kg
P38666	60S ribosomal protein L24-2 (Protein SHORT VALVE 1)	At3g53020	1	2	0.143183	1.10434	0.121087	0.237015	-5.03524	-4.86155	Root	100kg
Q9SF40	60S ribosomal protein L4-1 (L1)	At3g09630	1	1	0.148366	1.10831	0.154434	0.336699	-5.79907	-5.6507	Shoot	100kg
Q940B0	60S ribosomal protein L18-3	At5g27850	2	3	0.151181	1.11048	0.105791	0.152989	-5.92904	-5.81132	Shoot	100kg
P49209	60S ribosomal protein L9-1	At1g33120,At1g33140	2	2	0.152613	1.11158	0.109202	0.162252	-5.73647	-5.58385	Shoot	100kg
P51413_Q93VI3	60S ribosomal protein L17-1/ L17-2	At1g27400,At1g67430	1	1	0.15418	1.11279	0.227079	0.497157	-5.06414	-4.90996	Root	1500g
Q9ASR1	At1g56070/T6H22_13 (Elongation factor EF-2) (Putative elongation factor)	At1g56070	2	2	0.158553	1.11617	0.103149	0.124262	-5.50585	-5.34729	Shoot	1500g
P50883_Q9LFH5	60S ribosomal protein L12-1/ L12-2 (ABI-binding protein 11)	At2g37190,At3g53430	3	2	0.159944	1.11724	0.0863873	0.0641014	-5.07949	-4.9032	Root	100kg
P17094	60S ribosomal protein L3-1 (Protein EMBRYO DEFECTIVE 2207)	At1g43170	1	1	0.161299	1.11829	0.13798	0.242401	-5.79871	-5.63741	Shoot	soluble
P49209	60S ribosomal protein L9-1	At1g33120,At1g33140	2	2	0.163485	1.11999	0.103149	0.112979	-5.66851	-5.50503	Shoot	1500g
P49692	60S ribosomal protein L7a-1	At2g47610	2	3	0.165053	1.12121	0.0863873	0.0560533	-5.12997	-4.95245	Root	100kg
Q9ZT91	Elongation factor Tu, mitochondrial	At4g02930	2	2	0.165065	1.12122	0.0907645	0.0689706	-5.26067	-5.09561	Root	soluble
P51430	40S ribosomal protein S6-2 (Protein EMBRYO DEFECTIVE 3010)	At5g10360	2	1	0.1668	1.12257	0.121087	0.168351	-5.11567	-5.05358	Root	100kg
P41127	60S ribosomal protein L13-1 (Protein BBC1 homolog)	At3g49010	2	2	0.169521	1.12468	0.0878994	0.0537836	-5.11023	-4.94071	Root	100kg
Q42112	60S acidic ribosomal protein P0-2	At3g09200	2	2	0.172289	1.12685	0.103149	0.0948615	-5.74385	-5.57157	Shoot	1500g
P50883_Q9LFH5	60S ribosomal protein L12-1/ L12-2 (ABI-binding protein 11)	At2g37190,At3g53430	1	1	0.172722	1.12718	0.0898525	0.0545705	-5.35697	-5.18425	Root	1500g
Q9SF40	60S ribosomal protein L4-1 (L1)	At3g09630	1	1	0.176178	1.12989	0.145875	0.227151	-5.7961	-5.61992	Shoot	1500g
P49690	60S ribosomal protein L23 (Protein EMBRYO DEFECTIVE 2171)	At1g04480,At2g33370,At3g04400	3	2	0.177671	1.13106	0.101045	0.0786919	-5.97008	-5.64274	Shoot	1500g
P42798	40S ribosomal protein S15a-1	At1g07770,At5g59850	1	1	0.183133	1.13535	0.145875	0.209329	-5.90791	-5.72478	Shoot	1500g
P49690	60S ribosomal protein L23 (Protein EMBRYO DEFECTIVE 2171)	At1g04480,At2g33370,At3g04400	1	2	0.183164	1.13537	0.147141	0.213198	-5.82125	-5.62737	Shoot	100kg
Q9FZ76	60S ribosomal protein L6-1	At1g18540	1	1	0.193112	1.14323	0.13798	0.161643	-5.75927	-5.56615	Shoot	soluble
Q9SS17	40S ribosomal protein S24-1	At3g04920	1	1	0.193265	1.14335	0.145875	0.185215	-5.81408	-5.62081	Shoot	1500g
F4HUA0_P0DH99	Elongation factor 1-alpha 1 (EF-1-alpha 1) (eEF-1A1)	At1g07930,At1g07940	2	1	0.195601	1.1452	0.123873	0.114326	-4.92769	-4.7201	Root	soluble
P56807	30S ribosomal protein S18, chloroplastic	atcg00650	1	1	0.196435	1.14586	0.154434	0.203387	-6.20121	-6.00477	Shoot	100kg
Q9T043	60S ribosomal protein L14-2	At4g27090	1	1	0.206962	1.15425	0.145875	0.155968	-5.73143	-5.52446	Shoot	1500g
P0DH99	Elongation factor 1-alpha 1 (EF-1-alpha 1) (eEF-1A1)	At1g07940	2	2	0.209035	1.15591	0.131996	0.113273	-5.63494	-5.40421	Shoot	100kg
P60039	60S ribosomal protein L7-3	At2g44120	1	1	0.215129	1.16081	0.154434	0.163616	-5.65537	-5.44024	Shoot	100kg
P38666	60S ribosomal protein L24-2 (Protein SHORT VALVE 1)	At3g53020	1	1	0.225443	1.16914	0.154434	0.144346	-5.71912	-5.49367	Shoot	100kg
Q9ASR1	At1g56070/T6H22_13 (Elongation factor EF-2) (Putative elongation factor)	At1g56070	1	2	0.226228	1.16977	0.196656	0.249989	-5.25279	-5.02656	Root	1500g
Q9CAV0	40S ribosomal protein S3a-1	At3g04840	1	1	0.22995	1.17279	0.154434	0.136491	-5.8291	-5.59915	Shoot	100kg
Q9SLF7	60S acidic ribosomal protein P2-2	At2g27710	1	1	0.237715	1.17912	0.124308	0.0558381	-5.19297	-4.95525	Root	100kg
P17094	60S ribosomal protein L3-1 (Protein EMBRYO DEFECTIVE 2207)	At1g43170	7	6	0.149499	1.10918	0.0503764	0.00300096	-5.26095	-5.00768	Root	100kg
Q9M9W1	60S ribosomal protein L22-2	At3g05560	1	1	0.255683	1.1939	0.154434	0.0978008	-5.70025	-5.44456	Shoot	100kg
P34788	40S ribosomal protein S18	At1g22780,At1g34030,At4g09800	3	4	0.17349	1.12778	0.0708456	0.0143316	-5.06762	-4.93786	Root	100kg
P56791	50S ribosomal protein L2, chloroplastic	atcg00830,atcg01310	1	1	0.258585	1.19631	0.154434	0.0940513	-6.22085	-5.96227	Shoot	100kg
Q93VG5	40S ribosomal protein S8-1	At5g20290	3	4	0.177776	1.13114	0.0708456	0.0120955	-5.07198	-4.85891	Root	100kg
Q08682	40S ribosomal protein Sa-1 (Laminin receptor homolog) (p40)	At1g72370	1	1	0.189108	1.14006	0.0898525	0.0353219	-5.33887	-5.14976	Root	1500g
P59223_P59224	40S ribosomal protein S13-1/ S13-2	At3g60770,At4g00100	1	1	0.277976	1.21249	0.154434	0.071867	-5.92544	-5.64747	Shoot	100kg
P41376	Eukaryotic initiation factor 4A-1 (eIF-4A-1) (EC 3.6.4.13) (ATP-dependent RNA helicase eIF4A-1) (DEAD-box ATP-dependent RNA helicase 4)	At3g13920	1	1	0.280531	1.21464	0.154434	0.0692924	-5.61362	-5.33309	Shoot	100kg
P49205_Q9LZ17_Q9SJ36_Q9SQZ1	40S ribosomal protein S17-1/ S17-2/ S17-3/ S17-4	At2g04390,At2g05220,At3g10610,At5g04800	1	1	0.300418	1.2315	0.244869	0.219877	-5.33342	-5.03301	Root	soluble
Q08682	40S ribosomal protein Sa-1 (Laminin receptor homolog) (p40)	At1g72370	3	4	0.208	1.15509	0.0708456	0.00332514	-5.33321	-5.10999	Root	100kg
Q9ASR1	At1g56070/T6H22_13 (Elongation factor EF-2) (Putative elongation factor)	At1g56070	5	5	0.208154	1.15521	0.0555924	0.000180904	-5.12505	-4.91689	Root	100kg
Q9SS17	40S ribosomal protein S24-1	At3g04920	3	3	0.217368	1.16261	0.0518763	2.79e-05	-5.11322	-4.89585	Root	1500g
Q08770_Q93VT9_Q93W22	60S ribosomal protein L10-1/ L10-2/ L10-3	At1g14320,At1g26910,At1g66580	1	1	0.218712	1.16369	0.0898525	0.0149277	-5.03607	-4.81736	Root	1500g
Q9ASR1	At1g56070/T6H22_13 (Elongation factor EF-2) (Putative elongation factor)	At1g56070	8	7	0.219308	1.16418	0.0518369	2.33e-05	-5.51122	-5.18432	Shoot	soluble
P36210_P36212	50S ribosomal protein L12-1/ L12-3, chloroplastic (CL12-A/ Cl12-C)	At3g27830,At3g27850	1	1	0.339584	1.26539	0.296389	0.251905	-6.2561	-5.91652	Shoot	1500g
Q9LTF2_Q9SW09	40S ribosomal protein S10-1/ S10-3	At4g25740,At5g52650	1	1	0.223033	1.16719	0.0898525	0.0130567	-5.06349	-4.84046	Root	1500g
Q9SS17	40S ribosomal protein S24-1	At3g04920	3	3	0.237626	1.17905	0.0717695	0.000929773	-5.08025	-4.84263	Root	100kg
Q9ASR1	At1g56070/T6H22_13 (Elongation factor EF-2) (Putative elongation factor)	At1g56070	2	3	0.243965	1.18424	0.105791	0.0211053	-5.63303	-5.3961	Shoot	100kg
F4I894	Protein ILITYHIA	At1g64790	1	1	0.405779	1.3248	0.274785	0.139752	-5.08916	-4.68339	Root	100kg
Q42112	60S acidic ribosomal protein P0-2	At3g09200	3	3	0.244185	1.18442	0.0717695	0.000668103	-5.25629	-5.01211	Root	100kg
Q93VT9	60S ribosomal protein L10-1	At1g14320	2	2	0.25207	1.19091	0.109202	0.0209827	-5.64438	-5.39231	Shoot	100kg
Q8L8Y0_Q93VB8	40S ribosomal protein S2-1/ S2-2	At1g58380,At1g59359,At1g58983,At1g58684	2	2	0.252736	1.19146	0.0878994	0.00403652	-5.10757	-4.85484	Root	100kg
P51419	60S ribosomal protein L27-3	At4g15000	1	1	0.25299	1.19167	0.124308	0.0418331	-5.09752	-4.84453	Root	100kg
O23515_Q8VYF1	60S ribosomal protein L15-1/ L15-2	At4g16720,At4g17390	1	1	0.255314	1.1936	0.124308	0.0399878	-5.37353	-5.11821	Root	100kg
P0DH99	Elongation factor 1-alpha 1 (EF-1-alpha 1) (eEF-1A1)	At1g07940	8	10	0.255778	1.19398	0.0434976	4.1e-09	-5.10711	-4.88741	Root	100kg
P41376	Eukaryotic initiation factor 4A-1 (eIF-4A-1) (EC 3.6.4.13) (ATP-dependent RNA helicase eIF4A-1) (DEAD-box ATP-dependent RNA helicase 4)	At3g13920	1	1	0.269599	1.20547	0.124308	0.0300988	-5.02134	-4.75174	Root	100kg
Q9LTF2_Q9SW09	40S ribosomal protein S10-1/ S10-3	At4g25740,At5g52650	2	2	0.274182	1.20931	0.0878994	0.00181301	-5.11674	-4.84256	Root	100kg
Q9FJA6	40S ribosomal protein S3-3	At5g35530	1	1	0.301079	1.23207	0.124308	0.0154341	-5.08478	-4.7837	Root	100kg
Q9SLF7	60S acidic ribosomal protein P2-2	At2g27710	1	1	0.316063	1.24493	0.145875	0.0302596	-5.84684	-5.53078	Shoot	1500g
Q42112	60S acidic ribosomal protein P0-2	At3g09200	2	2	0.3291	1.25623	0.109202	0.00258091	-5.78409	-5.45499	Shoot	100kg
Q42112	60S acidic ribosomal protein P0-2	At3g09200	2	2	0.334259	1.26073	0.0635353	1.43e-07	-5.39723	-5.06297	Root	1500g
P0DH99	Elongation factor 1-alpha 1 (EF-1-alpha 1) (eEF-1A1)	At1g07940	8	5	0.336494	1.26268	0.0605829	2.79e-08	-5.62892	-5.27572	Shoot	soluble
O82204	60S ribosomal protein L28-1	At2g19730	1	1	0.357506	1.28121	0.154434	0.0206163	-5.98287	-5.62537	Shoot	100kg
A8MS83_Q8LD46_Q9M3C3	60S ribosomal protein L23a-1/ L23a-2	At2g39460,At2g39480	1	1	0.374223	1.29614	0.124308	0.00260869	-5.37591	-5.00169	Root	100kg
P0DH99	Elongation factor 1-alpha 1 (EF-1-alpha 1) (eEF-1A1)	At1g07940	3	2	0.377185	1.2988	0.101045	0.000189346	-5.68278	-5.33504	Shoot	1500g
O49160	Eukaryotic translation initiation factor 3 subunit C (eIF3c) (Eukaryotic translation initiation factor 3 subunit 8) (eIF3 p110) (p105)	At3g56150	2	1	0.408252	1.32708	0.121087	0.000747417	-4.98146	-4.52846	Root	100kg
P17745	Elongation factor Tu, chloroplastic (EF-Tu) (Ras-related protein RABE1b) (atRABE1b) (Ras-related protein Rab8D) (atRab8D)	At4g20360	5	4	0.433641	1.35064	0.0720486	1.76e-09	-6.20979	-5.63922	Shoot	1500g
P17745	Elongation factor Tu, chloroplastic (EF-Tu) (Ras-related protein RABE1b) (atRABE1b) (Ras-related protein Rab8D) (atRab8D)	At4g20360	4	5	0.439899	1.35651	0.0757796	6.44e-09	-6.13751	-5.69865	Shoot	100kg
Q9SI75	Elongation factor G, chloroplastic (cEF-G) (Elongation factor EF-G/SCO1) (Protein SNOWY COTYLEDON 1, chloroplastic) (atSCO1)	At1g62750	1	2	0.444756	1.36108	0.13462	0.000953854	-5.64987	-5.1465	Shoot	soluble
Q9SZD6	Elongation factor Ts	At4g29060	6	4	0.46076	1.37627	0.0678745	1.13e-11	-5.99503	-5.56808	Shoot	soluble
P17745	Elongation factor Tu, chloroplastic (EF-Tu) (Ras-related protein RABE1b) (atRABE1b) (Ras-related protein Rab8D) (atRab8D)	At4g20360	7	7	0.495933	1.41023	0.0521514	1.92e-21	-5.97972	-5.48379	Shoot	soluble
Q9SS17	40S ribosomal protein S24-1	At3g04920	1	1	0.499381	1.41361	0.154434	0.00122235	-5.86108	-5.3617	Shoot	100kg
Q9SCX3	Elongation factor 1-beta 2 (EF-1-beta 2) (Elongation factor 1-beta' 2) (EF-1-beta' 2) (Elongation factor 1B-alpha 2) (eEF-1B alpha 2)	At5g19510	4	4	0.517544	1.43152	0.0621542	8.31e-17	-5.26469	-4.74715	Root	100kg
Q9FPJ4_Q9SEH3	40S ribosomal protein S19-2/ S19-3	At5g15520,At5g61170	1	1	0.539429	1.4534	0.145875	0.0002174	-5.13945	-4.60002	Shoot	1500g
Q9FPJ4_Q9SEH3	40S ribosomal protein S19-2/ S19-3	At5g15520,At5g61170	1	2	0.620982	1.53792	0.147141	2.44e-05	-5.15542	-4.60942	Shoot	100kg
Q9SCX3	Elongation factor 1-beta 2 (EF-1-beta 2) (Elongation factor 1-beta' 2) (EF-1-beta' 2) (Elongation factor 1B-alpha 2) (eEF-1B alpha 2)	At5g19510	2	2	0.672181	1.59348	0.0975664	5.6e-12	-5.53708	-4.86489	Shoot	soluble
Q93VP3	Eukaryotic translation initiation factor 5A-2 (atELF5A-2) (eIF-5A-2) (Protein FUMONISIN B1-RESISTANT 12)	At1g26630	1	2	0.67761	1.59949	0.13462	4.82e-07	-5.00324	-4.3856	Shoot	soluble
P61841	30S ribosomal protein S7, chloroplastic	atcg00900,atcg01240	2	1	0.688158	1.61123	0.147141	2.91e-06	-6.38608	-5.85015	Shoot	100kg
Q9ZT91	Elongation factor Tu, mitochondrial	At4g02930	1	1	0.7093	1.63501	0.0898525	2.93e-15	-5.82078	-5.11148	Root	1500g
Q93ZC2	At5g36230/T30G6_9 (C-terminal W2 domain of eIF4-gamma/eIF5/eIF2b-epsilon-containing protein) (Putative uncharacterized protein At5g36230)	At5g36230	1	1	0.772361	1.70806	0.124308	5.19e-10	-5.47342	-4.70106	Root	100kg
Q9ZT91	Elongation factor Tu, mitochondrial	At4g02930	1	1	0.908329	1.87687	0.124308	2.73e-13	-5.96679	-5.05846	Root	100kg
Q8L611	Protein transport protein SEC31 homolog B (SEC31-like protein B)	At3g63460	1	1	0.276153	1.21096	0.124308	0.0263164	-5.00574	-4.72959	Root	100kg
Q9LHE5	Mitochondrial import receptor subunit TOM40-1 (Translocase of outer membrane 40 kDa subunit homolog 1) [Cleaved into: Mitochondrial import receptor subunit TOM40-1, N-terminally processed]	At3g20000	2	2	0.102692	1.07378	0.0878994	0.242688	-5.42604	-5.32335	Root	100kg
Q9SKT0	Protein THYLAKOID FORMATION 1, chloroplastic	At2g20890	1	1	0.127763	1.0926	0.13798	0.354469	-5.99643	-5.86867	Shoot	soluble
Q9ZU25	Probable mitochondrial-processing peptidase subunit alpha-1 (EC 3.4.24.64) (Alpha-MPP 1)	At1g51980	1	1	0.194893	1.14464	0.254272	0.443394	-6.09896	-5.90406	Shoot	100kg
P37107	Signal recognition particle 54 kDa protein, chloroplastic (54 chloroplast protein) (54CP) (SRP54) (cpSRP54) (FFC)	At5g03940	1	1	0.232649	1.17499	0.154434	0.13195	-5.98043	-5.74778	Shoot	100kg
Q42290	Probable mitochondrial-processing peptidase subunit beta (EC 3.4.24.64) (Beta-MPP)	At3g02090	1	2	0.272354	1.20778	0.147141	0.0641732	-5.74518	-5.51	Shoot	100kg
Q42290	Probable mitochondrial-processing peptidase subunit beta (EC 3.4.24.64) (Beta-MPP)	At3g02090	6	6	0.179669	1.13262	0.0544885	0.000975905	-5.33464	-5.17589	Root	100kg
O82251	Protein TIC 20-II, chloroplastic (Translocon at the inner envelope membrane of chloroplasts 20-II) (atTIC20-II)	At2g47840	1	1	0.318048	1.24664	0.154434	0.0394524	-6.43128	-6.11323	Shoot	100kg
Q56Z59	Patellin-3	At1g72160	1	1	0.325655	1.25323	0.124308	0.00879979	-5.83109	-5.50544	Root	100kg
Q9ZU25	Probable mitochondrial-processing peptidase subunit alpha-1 (EC 3.4.24.64) (Alpha-MPP 1)	At1g51980	4	4	0.330917	1.25781	0.0621542	1.01e-07	-5.63469	-5.30378	Root	100kg
Q94C59	Patellin-4	At1g30690	1	1	0.379743	1.30111	0.124308	0.00225179	-6.4899	-6.11016	Root	100kg
Q8LPR9	Protein TIC110, chloroplastic (Translocon at the inner envelope membrane of chloroplasts 110) (atTIC110)	At1g06950	5	3	0.528763	1.44269	0.0858106	7.18e-10	-6.22413	-5.60495	Shoot	100kg
O80845	Peroxisomal membrane protein 11D (Peroxin-11D) (atPEX11d)	At2g45740	1	1	0.541944	1.45593	0.154434	0.000449423	-5.21234	-4.67039	Shoot	100kg
Q9SPE6	Alpha-soluble NSF attachment protein 2 (Alpha-SNAP2) (N-ethylmaleimide-sensitive factor attachment protein alpha 2)	At3g56190	1	1	0.577469	1.49223	0.124308	3.39e-06	-4.92877	-4.3513	Root	100kg
Q56YA5	Serine--glyoxylate aminotransferase (EC 2.6.1.45) (Alanine--glyoxylate aminotransferase) (AGT) (EC 2.6.1.44) (Asparagine aminotransferase) (EC 2.6.1.-) (Serine--pyruvate aminotransferase) (EC 2.6.1.51)	At2g13360	1	1	0.415387	1.33366	0.154434	0.00715095	-5.82873	-5.41334	Shoot	100kg
Q9C9W5_Q9C9W5-2	Glycerate dehydrogenase HPR, peroxisomal (GDH) (EC 1.1.1.29) (NADH-dependent hydroxypyruvate reductase 1) (atHPR1) (HPR 1)	At1g68010	1	1	0.676733	1.59852	0.145875	3.5e-06	-5.69208	-5.01534	Shoot	1500g
Q9C9W5_Q9C9W5-2	Glycerate dehydrogenase HPR, peroxisomal (GDH) (EC 1.1.1.29) (NADH-dependent hydroxypyruvate reductase 1) (atHPR1) (HPR 1)	At1g68010	1	1	0.766137	1.70071	0.13798	2.82e-08	-5.39343	-4.6273	Shoot	soluble
Q94B78	Glycine dehydrogenase (decarboxylating) 1, mitochondrial (EC 1.4.4.2) (Glycine cleavage system P protein 1) (Glycine decarboxylase 1) (Glycine decarboxylase P-protein 1) (atGLDP1) (Glycine dehydrogenase (aminomethyl-transferring) 1)	At4g33010	1	1	0.344449	1.26967	0.154434	0.0257216	-5.88551	-5.54106	Shoot	100kg
Q9FVQ4	Plastidal glycolate/glycerate translocator 1, chloroplastic (Bacterial membrane protein LrgB-like protein) (atLrgB)	At1g32080	1	1	-0.40186	0.756882	0.154434	0.00926437	-6.40427	-6.80613	Shoot	100kg
Q56YA5	Serine--glyoxylate aminotransferase (EC 2.6.1.45) (Alanine--glyoxylate aminotransferase) (AGT) (EC 2.6.1.44) (Asparagine aminotransferase) (EC 2.6.1.-) (Serine--pyruvate aminotransferase) (EC 2.6.1.51)	At2g13360	4	3	0.0943913	1.06761	0.0786987	0.230372	-5.88253	-5.75935	Shoot	soluble
Q56YA5	Serine--glyoxylate aminotransferase (EC 2.6.1.45) (Alanine--glyoxylate aminotransferase) (AGT) (EC 2.6.1.44) (Asparagine aminotransferase) (EC 2.6.1.-) (Serine--pyruvate aminotransferase) (EC 2.6.1.51)	At2g13360	1	1	0.214288	1.16013	0.145875	0.141837	-5.80712	-5.59284	Shoot	1500g
Q9LQL0	Glycine cleavage system H protein 3, mitochondrial	At1g32470	1	1	0.293104	1.22527	0.13798	0.0336489	-6.28011	-5.98701	Shoot	soluble
Q9LQL0	Glycine cleavage system H protein 3, mitochondrial	At1g32470	3	3	0.399164	1.31874	0.0891627	7.58e-06	-6.34214	-5.94297	Shoot	100kg
P0DKC3	Phosphoglycolate phosphatase 1A, chloroplastic (EC 3.1.3.18)	At5g36700	2	2	0.532578	1.44651	0.0975664	4.8e-08	-6.25615	-5.72357	Shoot	soluble
Q9LRR9_Q9LRR9-2	Peroxisomal (S)-2-hydroxy-acid oxidase GLO1 (EC 1.1.3.15) (Glycolate oxidase 1) (atGLO1) (GOX 1) (Short chain alpha-hydroxy acid oxidase GLO1)	At3g14420	1	1	0.720117	1.64732	0.154434	3.12e-06	-6.22534	-5.50522	Shoot	100kg
Q9LRR9	Peroxisomal (S)-2-hydroxy-acid oxidase GLO1 (EC 1.1.3.15) (Glycolate oxidase 1) (atGLO1) (GOX 1) (Short chain alpha-hydroxy acid oxidase GLO1)	At3g14420	2	2	0.747124	1.67844	0.126357	3.36e-09	-5.95084	-5.21658	Shoot	soluble
Q9LRS0	Peroxisomal (S)-2-hydroxy-acid oxidase GLO2 (EC 1.1.3.15) (Glycolate oxidase 1) (atGLO2) (GOX 1) (Short chain alpha-hydroxy acid oxidase GLO2)	At3g14415	2	2	0.78955	1.72853	0.0975664	5.85e-16	-6.00951	-5.21996	Shoot	soluble
P25856	Glyceraldehyde-3-phosphate dehydrogenase GAPA1, chloroplastic (EC 1.2.1.13) (NADP-dependent glyceraldehydephosphate dehydrogenase A subunit 1)	At3g26650	4	4	-0.11449	0.923709	0.0772172	0.138154	-6.57874	-6.69323	Shoot	100kg
P25856	Glyceraldehyde-3-phosphate dehydrogenase GAPA1, chloroplastic (EC 1.2.1.13) (NADP-dependent glyceraldehydephosphate dehydrogenase A subunit 1)	At3g26650	2	1	-0.103534	0.93075	0.13462	0.441842	-6.34621	-6.44783	Shoot	soluble
P10795	Ribulose bisphosphate carboxylase small chain 1A, chloroplastic (RuBisCO small subunit 1A) (EC 4.1.1.39)	At1g67090	1	2	-0.0640502	0.956575	0.141389	0.650544	-5.91284	-6.04109	Shoot	1500g
P10795	Ribulose bisphosphate carboxylase small chain 1A, chloroplastic (RuBisCO small subunit 1A) (EC 4.1.1.39)	At1g67090	2	2	-0.00168885	0.99883	0.109202	0.987661	-6.15702	-6.1587	Shoot	100kg
Q944G9	Probable fructose-bisphosphate aldolase 2, chloroplastic (EC 4.1.2.13)	At4g38970	2	1	0.0289916	1.0203	0.13462	0.829487	-5.9841	-6.02661	Shoot	soluble
P25851	Fructose-1,6-bisphosphatase, chloroplastic (FBPase) (EC 3.1.3.11) (D-fructose-1,6-bisphosphate 1-phosphohydrolase)	At3g54050	2	2	0.0375898	1.0264	0.0975664	0.700035	-6.21303	-6.17544	Shoot	soluble
P10796	Ribulose bisphosphate carboxylase small chain 1B, chloroplastic (RuBisCO small subunit 1B) (EC 4.1.1.39)	At5g38430	1	2	0.14242	1.10375	0.141389	0.313794	-6.28279	-6.19203	Shoot	1500g
P46283	Sedoheptulose-1,7-bisphosphatase, chloroplastic (EC 3.1.3.37) (SED(1,7)P2ase) (Sedoheptulose bisphosphatase) (SBPase)	At3g55800	7	8	0.167642	1.12322	0.0518369	0.00122056	-6.14874	-5.99428	Shoot	soluble
P25857	Glyceraldehyde-3-phosphate dehydrogenase GAPB, chloroplastic (EC 1.2.1.13) (NADP-dependent glyceraldehydephosphate dehydrogenase B)	At1g42970	6	4	0.200404	1.14902	0.0755865	0.00801768	-6.55207	-6.33852	Shoot	soluble
Q9LD57	Phosphoglycerate kinase 1, chloroplastic (EC 2.7.2.3)	At3g12780	3	3	0.27238	1.2078	0.0974181	0.00517414	-6.24388	-5.95565	Shoot	1500g
P25857	Glyceraldehyde-3-phosphate dehydrogenase GAPB, chloroplastic (EC 1.2.1.13) (NADP-dependent glyceraldehydephosphate dehydrogenase B)	At1g42970	3	2	0.309016	1.23886	0.101045	0.00222681	-6.71551	-6.27799	Shoot	1500g
Q9LD57	Phosphoglycerate kinase 1, chloroplastic (EC 2.7.2.3)	At3g12780	4	4	0.336943	1.26308	0.0689898	1.04e-06	-6.36149	-6.02455	Shoot	soluble
O03042	Ribulose bisphosphate carboxylase large chain (RuBisCO large subunit) (EC 4.1.1.39)	atcg00490	16	15	0.384858	1.30573	0.0404948	2.02e-21	-6.17597	-5.73889	Shoot	100kg
P25697	Phosphoribulokinase, chloroplastic (PRK) (PRKase) (EC 2.7.1.19) (Phosphopentokinase)	At1g32060	4	4	0.389828	1.31024	0.0689898	1.6e-08	-6.31613	-5.9263	Shoot	soluble
O03042	Ribulose bisphosphate carboxylase large chain (RuBisCO large subunit) (EC 4.1.1.39)	atcg00490	13	10	0.398524	1.31816	0.0472434	3.3e-17	-6.18471	-5.7569	Shoot	1500g
Q9SJU4	Probable fructose-bisphosphate aldolase 1, chloroplastic (EC 4.1.2.13)	At2g21330	2	2	0.41469	1.33301	0.0975664	2.13e-05	-5.96888	-5.55419	Shoot	soluble
O03042	Ribulose bisphosphate carboxylase large chain (RuBisCO large subunit) (EC 4.1.1.39)	atcg00490	16	16	0.428528	1.34586	0.0353999	9.89e-34	-6.21313	-5.74126	Shoot	soluble
P10796	Ribulose bisphosphate carboxylase small chain 1B, chloroplastic (RuBisCO small subunit 1B) (EC 4.1.1.39)	At5g38430	1	1	0.436972	1.35376	0.13798	0.00154059	-6.24508	-5.80811	Shoot	soluble
Q9SKP6	Triosephosphate isomerase, chloroplastic (TIM) (Triose-phosphate isomerase) (EC 5.3.1.1)	At2g21170	2	3	0.458288	1.37391	0.095989	1.8e-06	-6.24753	-5.76895	Shoot	soluble
P25857	Glyceraldehyde-3-phosphate dehydrogenase GAPB, chloroplastic (EC 1.2.1.13) (NADP-dependent glyceraldehydephosphate dehydrogenase B)	At1g42970	4	3	0.518485	1.43245	0.0972942	9.87e-08	-6.8612	-6.20737	Shoot	100kg
P50318	Phosphoglycerate kinase 2, chloroplastic (EC 2.7.2.3)	At1g56190	3	1	0.536884	1.45084	0.133481	5.77e-05	-6.53463	-6.01961	Shoot	soluble
P10797_P10798	Ribulose bisphosphate carboxylase small chain 2B/ 3B, chloroplastic (RuBisCO small subunit 2B/3B) (EC 4.1.1.39)	At5g38420,At5g38410	2	2	0.611354	1.52769	0.103149	3.09e-09	-6.41509	-5.80373	Shoot	1500g
P10896_P10896-2	Ribulose bisphosphate carboxylase/oxygenase activase, chloroplastic (RA) (RuBisCO activase)	At2g39730	11	4	0.63185	1.54955	0.0700702	1.93e-19	-6.08907	-5.37169	Shoot	1500g
P10896_P10896-2	Ribulose bisphosphate carboxylase/oxygenase activase, chloroplastic (RA) (RuBisCO activase)	At2g39730	12	11	0.651391	1.57068	0.0490559	3.08e-40	-6.07964	-5.44158	Shoot	100kg
Q9SKP6	Triosephosphate isomerase, chloroplastic (TIM) (Triose-phosphate isomerase) (EC 5.3.1.1)	At2g21170	1	1	0.687591	1.61059	0.12836	8.47e-08	-6.50759	-5.82	Root	soluble
Q8RWV0	Transketolase-1, chloroplastic (TK) (EC 2.2.1.1)	At3g60750	1	1	0.25237	1.19116	0.12836	0.0492869	-5.65398	-5.40161	Root	soluble
Q8RWV0	Transketolase-1, chloroplastic (TK) (EC 2.2.1.1)	At3g60750	1	1	0.246261	1.18613	0.154434	0.110801	-6.3325	-6.08624	Shoot	100kg
Q8RWV0	Transketolase-1, chloroplastic (TK) (EC 2.2.1.1)	At3g60750	12	14	0.133926	1.09728	0.0395566	0.000709997	-6.21134	-6.09241	Shoot	soluble
Q8RWV0	Transketolase-1, chloroplastic (TK) (EC 2.2.1.1)	At3g60750	1	1	-0.0140156	0.990332	0.145875	0.923457	-6.09659	-6.1106	Shoot	1500g
Q9M158	Rhodanese-like domain-containing protein 4, chloroplastic (Protein THYLAKOID RHODANESE-LIKE) (Sulfurtransferase 4) (atStr4)	At4g01050	3	3	0.319159	1.2476	0.0891627	0.000344238	-6.02934	-5.71018	Shoot	100kg
Q9M158	Rhodanese-like domain-containing protein 4, chloroplastic (Protein THYLAKOID RHODANESE-LIKE) (Sulfurtransferase 4) (atStr4)	At4g01050	2	2	0.455916	1.37165	0.103149	9.87e-06	-6.20167	-5.74576	Shoot	1500g
P56759	ATP synthase subunit b, chloroplastic (ATP synthase F(0) sector subunit b) (ATPase subunit I)	atcg00130	6	5	-0.0192639	0.986736	0.0645754	0.765462	-6.2684	-6.22512	Shoot	1500g
Q9S7J7_Q9SHR7_Q9XF87	Photosystem II light harvesting complex protein 2.1/ 2.2/ 2.3	At2g05100,At2g05070,At3g27690	2	3	0.0388133	1.02727	0.101045	0.700891	-6.15215	-6.16046	Shoot	1500g
Q01667	Chlorophyll a-b binding protein 6, chloroplastic (LHCI-730) (LHCII type III CAB-6) (Light-harvesting complex protein Lhca1)	At3g54890	1	1	0.0495959	1.03497	0.13798	0.719264	-6.17215	-6.12255	Shoot	soluble
Q9S7J7_Q9SHR7_Q9XF87	Photosystem II light harvesting complex protein 2.1/ 2.2/ 2.3	At2g05100,At2g05070,At3g27690	2	2	0.115932	1.08367	0.109202	0.288402	-6.07729	-5.96136	Shoot	100kg
Q39142	Light-harvesting chlorophyll protein complex II subunit B1 (Photosystem II type I chlorophyll a /b binding protein) (Putative photosystem II type I chlorophyll a b binding protein) (Putative photosystem II type I chlorophyll a/b binding protein)	At2g34430	1	1	0.164745	1.12097	0.154434	0.286077	-6.60573	-6.44098	Shoot	100kg
P49107_P49107-2	Photosystem I reaction center subunit N, chloroplastic (PSI-N)	At5g64040	1	1	0.164809	1.12102	0.154434	0.285892	-6.14161	-5.9768	Shoot	100kg
Q9SUI4	Photosystem I reaction center subunit XI, chloroplastic (PSI-L) (PSI subunit V)	At4g12800	3	2	0.1927	1.1429	0.101045	0.0565124	-6.37512	-6.16661	Shoot	1500g
Q39142	Light-harvesting chlorophyll protein complex II subunit B1 (Photosystem II type I chlorophyll a /b binding protein) (Putative photosystem II type I chlorophyll a b binding protein) (Putative photosystem II type I chlorophyll a/b binding protein)	At2g34430	1	2	0.200188	1.14885	0.141389	0.156814	-6.69372	-6.15289	Shoot	1500g
Q9ZR03_Q9ZR03-2	Cytochrome b6-f complex iron-sulfur subunit, chloroplastic (EC 1.10.9.1) (Plastohydroquinone:plastocyanin oxidoreductase iron-sulfur protein) (Proton gradient regulation protein 1) (Rieske iron-sulfur protein) (ISP) (RISP)	At4g03280	1	1	0.204326	1.15215	0.13798	0.138649	-5.8831	-5.67878	Shoot	soluble
P56771	Apocytochrome f	atcg00540	12	11	0.114645	1.08271	0.0437604	0.00879743	-6.15963	-6.04633	Shoot	1500g
Q9SUI6	Photosystem I reaction center subunit VI-2, chloroplastic (PSI-H1)	At1g52230	2	1	0.246863	1.18662	0.147141	0.0934002	-6.2515	-5.97887	Shoot	100kg
Q8W493_Q8W493-2	Ferredoxin--NADP reductase, leaf isozyme 2, chloroplastic (EC 1.18.1.2) (Leaf FNR 2) (atLFNR2) (FNR-2)	At1g20020	1	2	0.248326	1.18783	0.13462	0.0650888	-6.27613	-6.03121	Shoot	soluble
P56771	Apocytochrome f	atcg00540	9	10	0.140145	1.10202	0.0510012	0.00599831	-6.02614	-5.89144	Shoot	100kg
P56759	ATP synthase subunit b, chloroplastic (ATP synthase F(0) sector subunit b) (ATPase subunit I)	atcg00130	9	9	0.147721	1.10782	0.0514781	0.00411007	-6.20368	-6.05596	Shoot	100kg
P23321	Oxygen-evolving enhancer protein 1-1, chloroplastic (OEE1) (33 kDa subunit of oxygen evolving system of photosystem II) (33 kDa thylakoid membrane protein) (Manganese-stabilizing protein 1) (MSP-1) (OEC 33 kDa subunit)	At5g66570	3	3	0.212418	1.15863	0.0891627	0.0172022	-6.0635	-5.85108	Shoot	100kg
P56779	Cytochrome b559 subunit alpha (PSII reaction center subunit V)	atcg00580	4	4	0.228068	1.17127	0.0772172	0.00314102	-5.757	-5.52893	Shoot	100kg
Q01908	ATP synthase gamma chain 1, chloroplastic (F-ATPase gamma subunit 1)	At4g04640	5	4	0.2303	1.17308	0.0797658	0.0038869	-5.99195	-5.79968	Shoot	1500g
P56766	Photosystem I P700 chlorophyll a apoprotein A1 (EC 1.97.1.12) (PSI-A) (PsaA)	atcg00350	4	3	0.232195	1.17462	0.082936	0.00511512	-6.10669	-5.8837	Shoot	1500g
P56757	ATP synthase subunit alpha, chloroplastic (EC 3.6.3.14) (ATP synthase F1 sector subunit alpha) (F-ATPase subunit alpha)	atcg00120	16	13	0.266923	1.20324	0.0399964	2.49e-11	-6.30785	-6.02148	Shoot	1500g
Q42139	At4g32260/F10M6_100 (ATP synthase beta chain (Subunit II)) (EC 3.6.1.34) (F-type H+-transporting ATPase subunit b) (H+-transporting ATP synthase chain 9-like protein) (H+-transporting ATP synthase chain9 - like protein)	At4g32260	4	2	0.271249	1.20685	0.099977	0.00666542	-6.24128	-6.0147	Shoot	1500g
Q42029_Q42029-2	Oxygen-evolving enhancer protein 2-1, chloroplastic (OEE2) (23 kDa subunit of oxygen evolving system of photosystem II) (23 kDa thylakoid membrane protein) (OEC 23 kDa subunit) (OEC23)	At1g06680	4	4	0.271973	1.20746	0.0772172	0.000428008	-6.4265	-6.15453	Shoot	100kg
Q9S7H1	Photosystem I reaction center subunit II-1, chloroplastic (Photosystem I 20 kDa subunit 1) (PSI-D1)	At4g02770	2	2	0.275899	1.21075	0.131996	0.036599	-6.1837	-5.86887	Shoot	100kg
Q9LR64	Photosystem II repair protein PSB27-H1, chloroplastic (Psb27-H1) (Thylakoid lumenal protein PSB27-H1)	At1g03600	1	1	0.302171	1.233	0.154434	0.0503908	-6.59602	-6.29385	Shoot	100kg
P56780	Photosystem II reaction center protein H (PSII-H) (Photosystem II 10 kDa phosphoprotein)	atcg00710	2	2	0.283026	1.21674	0.103149	0.00607228	-5.71046	-5.42743	Shoot	1500g
P09468	ATP synthase epsilon chain, chloroplastic (ATP synthase F1 sector epsilon subunit) (F-ATPase epsilon subunit)	atcg00470	4	4	0.284038	1.2176	0.0729374	9.85e-05	-5.76722	-5.48318	Shoot	1500g
P56780	Photosystem II reaction center protein H (PSII-H) (Photosystem II 10 kDa phosphoprotein)	atcg00710	2	2	0.296316	1.228	0.109202	0.00665811	-5.57304	-5.27673	Shoot	100kg
P56766	Photosystem I P700 chlorophyll a apoprotein A1 (EC 1.97.1.12) (PSI-A) (PsaA)	atcg00350	4	4	0.297265	1.22881	0.0772172	0.000118252	-6.04458	-5.74731	Shoot	100kg
Q9ZR03_Q9ZR03-2	Cytochrome b6-f complex iron-sulfur subunit, chloroplastic (EC 1.10.9.1) (Plastohydroquinone:plastocyanin oxidoreductase iron-sulfur protein) (Proton gradient regulation protein 1) (Rieske iron-sulfur protein) (ISP) (RISP)	At4g03280	4	4	0.29737	1.2289	0.0772172	0.000117594	-5.87749	-5.58012	Shoot	100kg
Q9SHE8	Photosystem I reaction center subunit III, chloroplastic (Light-harvesting complex I 17 kDa protein) (PSI-F)	At1g31330	5	5	0.298764	1.23009	0.0690652	1.52e-05	-6.17143	-5.87267	Shoot	100kg
Q39141	Photosystem II light harvesting complex protein 1.5 (LHB1B2, LHCB1.5)	At2g34420	1	1	0.3231	1.25102	0.13798	0.0191988	-6.22291	-5.89981	Shoot	soluble
Q9SHE8	Photosystem I reaction center subunit III, chloroplastic (Light-harvesting complex I 17 kDa protein) (PSI-F)	At1g31330	3	4	0.325045	1.2527	0.082936	8.88e-05	-6.31808	-5.97887	Shoot	1500g
Q9S7N7	Photosystem I reaction center subunit V, chloroplastic (PSI-G)	At1g55670	3	3	0.331088	1.25796	0.0842208	8.45e-05	-5.99842	-5.66734	Shoot	1500g
P19366	ATP synthase subunit beta, chloroplastic (EC 3.6.3.14) (ATP synthase F1 sector subunit beta) (F-ATPase subunit beta)	atcg00480	26	28	0.331304	1.25815	0.0304536	1.45e-27	-5.86821	-5.53918	Shoot	100kg
Q07473	Chlorophyll a-b binding protein CP29.1, chloroplastic (LHCB4.1) (LHCII protein 4.1)	At5g01530	2	2	0.331465	1.25829	0.109202	0.0024026	-6.03785	-5.70638	Shoot	100kg
P56777	Photosystem II CP47 reaction center protein (PSII 47 kDa protein) (Protein CP-47)	atcg00680	14	14	0.335869	1.26214	0.0422373	1.84e-15	-5.87844	-5.53931	Shoot	100kg
P56779	Cytochrome b559 subunit alpha (PSII reaction center subunit V)	atcg00580	4	4	0.335897	1.26216	0.0729374	4.12e-06	-5.93882	-5.60293	Shoot	1500g
Q9SUI4	Photosystem I reaction center subunit XI, chloroplastic (PSI-L) (PSI subunit V)	At4g12800	2	2	0.336836	1.26298	0.109202	0.0020387	-6.27677	-5.93993	Shoot	100kg
Q9ZR03_Q9ZR03-2	Cytochrome b6-f complex iron-sulfur subunit, chloroplastic (EC 1.10.9.1) (Plastohydroquinone:plastocyanin oxidoreductase iron-sulfur protein) (Proton gradient regulation protein 1) (Rieske iron-sulfur protein) (ISP) (RISP)	At4g03280	5	2	0.338698	1.26461	0.0993304	0.000650074	-5.98579	-5.65026	Shoot	1500g
P56757	ATP synthase subunit alpha, chloroplastic (EC 3.6.3.14) (ATP synthase F1 sector subunit alpha) (F-ATPase subunit alpha)	atcg00120	18	17	0.339896	1.26567	0.0372634	7.41e-20	-6.21393	-5.86851	Shoot	100kg
Q9S7M0	Light-harvesting chlorophyll B-binding protein 3	At5g54270	2	1	0.342607	1.26805	0.147141	0.0198895	-6.25479	-5.90956	Shoot	100kg
P23321	Oxygen-evolving enhancer protein 1-1, chloroplastic (OEE1) (33 kDa subunit of oxygen evolving system of photosystem II) (33 kDa thylakoid membrane protein) (Manganese-stabilizing protein 1) (MSP-1) (OEC 33 kDa subunit)	At5g66570	2	1	0.349294	1.27394	0.141389	0.0134943	-6.42341	-5.97687	Shoot	1500g
Q37165	NAD(P)H-quinone oxidoreductase subunit 1, chloroplastic (EC 1.6.5.-) (NAD(P)H dehydrogenase subunit 1) (NDH subunit 1) (NADH-plastoquinone oxidoreductase subunit 1)	atcg01100	1	1	0.352776	1.27702	0.154434	0.0223534	-6.29379	-5.94101	Shoot	100kg
Q9SUI6	Photosystem I reaction center subunit VI-2, chloroplastic (PSI-H1)	At1g52230	2	1	0.353278	1.27746	0.141389	0.0124675	-6.23347	-5.92314	Shoot	1500g
Q9SSS9	F-type H+-transporting ATPase subunit delta (H+-transporting ATP synthase-like protein) (Putative H+-transporting ATP synthase)	At4g09650	2	1	0.355202	1.27917	0.141389	0.0119968	-6.07723	-5.72255	Shoot	1500g
P56777	Photosystem II CP47 reaction center protein (PSII 47 kDa protein) (Protein CP-47)	atcg00680	17	13	0.35721	1.28095	0.0398777	3.32e-19	-6.04047	-5.62906	Shoot	1500g
P19366	ATP synthase subunit beta, chloroplastic (EC 3.6.3.14) (ATP synthase F1 sector subunit beta) (F-ATPase subunit beta)	atcg00480	27	22	0.370398	1.29271	0.0307498	2.05e-33	-6.04919	-5.63603	Shoot	1500g
Q41932	Oxygen-evolving enhancer protein 3-2, chloroplastic (OEE3) (16 kDa subunit of oxygen evolving system of photosystem II) (OEC 16 kDa subunit)	At4g05180	3	3	0.379206	1.30063	0.0796626	1.93e-06	-6.11655	-5.73734	Shoot	soluble
Q9SYW8	Lhca2 protein (Photosystem I light harvesting complex protein) (Putative Lhca2 protein)	At3g61470	2	2	0.381577	1.30277	0.103149	0.000216214	-5.94061	-5.55903	Shoot	1500g
P56761	Photosystem II D2 protein (PSII D2 protein) (EC 1.10.3.9) (Photosystem Q(A) protein)	atcg00270	4	3	0.381725	1.3029	0.082936	4.17e-06	-4.98569	-4.61149	Shoot	1500g
P23321	Oxygen-evolving enhancer protein 1-1, chloroplastic (OEE1) (33 kDa subunit of oxygen evolving system of photosystem II) (33 kDa thylakoid membrane protein) (Manganese-stabilizing protein 1) (MSP-1) (OEC 33 kDa subunit)	At5g66570	2	1	0.406808	1.32575	0.272399	0.135326	-6.47411	-6.0673	Shoot	soluble
Q9S7M0	Light-harvesting chlorophyll B-binding protein 3	At5g54270	1	2	0.382378	1.30349	0.141389	0.00684197	-6.37345	-5.98916	Shoot	1500g
P56757	ATP synthase subunit alpha, chloroplastic (EC 3.6.3.14) (ATP synthase F1 sector subunit alpha) (F-ATPase subunit alpha)	atcg00120	3	2	0.38564	1.30644	0.095989	5.88e-05	-6.14302	-5.76504	Shoot	soluble
P56767	Photosystem I P700 chlorophyll a apoprotein A2 (EC 1.97.1.12) (PSI-B) (PsaB)	atcg00340	3	4	0.388661	1.30918	0.082936	2.78e-06	-6.13716	-5.73725	Shoot	1500g
Q01908	ATP synthase gamma chain 1, chloroplastic (F-ATPase gamma subunit 1)	At4g04640	5	5	0.391413	1.31168	0.0738854	1.17e-07	-5.97196	-5.60678	Shoot	100kg
P27521	Chlorophyll a-b binding protein 4, chloroplastic (LHCI type III CAB-4)	At3g47470	1	1	0.393916	1.31396	0.13798	0.00430523	-6.3335	-5.93959	Shoot	soluble
Q9XF89	Chlorophyll a-b binding protein CP26, chloroplastic (LHCB5) (LHCIIc) (Light-harvesting complex II protein 5)	At4g10340	10	12	0.400631	1.32009	0.04808	7.91e-17	-6.2025	-5.79807	Shoot	100kg
P19366	ATP synthase subunit beta, chloroplastic (EC 3.6.3.14) (ATP synthase F1 sector subunit beta) (F-ATPase subunit beta)	atcg00480	8	7	0.407869	1.32673	0.0518369	3.59e-15	-6.02236	-5.59756	Shoot	soluble
P09468	ATP synthase epsilon chain, chloroplastic (ATP synthase F1 sector epsilon subunit) (F-ATPase epsilon subunit)	atcg00470	4	4	0.410314	1.32898	0.0772172	1.07e-07	-5.71948	-5.30916	Shoot	100kg
P04778	Chlorophyll a-b binding protein 1, chloroplastic (Chlorophyll a-b protein 140) (CAB-140) (LHCII type I CAB-1)	At1g29930	3	2	0.413384	1.33181	0.101045	4.29e-05	-6.29012	-5.86314	Shoot	1500g
Q9XFT3-2	Oxygen-evolving enhancer protein 3-1, chloroplastic (OEE3) (16 kDa subunit of oxygen evolving system of photosystem II) (OEC 16 kDa subunit)	At4g21280	4	3	0.414555	1.33289	0.0870828	1.93e-06	-6.92849	-6.42997	Shoot	100kg
Q2V2R9_Q9SY97	PSI type III chlorophyll a/b-binding protein	At1g61520	3	3	0.417467	1.33558	0.0842208	7.17e-07	-6.00322	-5.58575	Shoot	1500g
Q9XF91	Photosystem II 22 kDa protein, chloroplastic (CP22)	At1g44575	6	6	0.423742	1.3414	0.0595531	1.12e-12	-6.22366	-5.79992	Shoot	1500g
Q07473	Chlorophyll a-b binding protein CP29.1, chloroplastic (LHCB4.1) (LHCII protein 4.1)	At5g01530	3	3	0.425596	1.34313	0.0842208	4.34e-07	-6.15526	-5.72966	Shoot	1500g
Q01667	Chlorophyll a-b binding protein 6, chloroplastic (LHCI-730) (LHCII type III CAB-6) (Light-harvesting complex protein Lhca1)	At3g54890	3	4	0.426321	1.3438	0.0870828	9.8e-07	-6.28674	-5.88481	Shoot	100kg
Q9XF88	Chlorophyll a-b binding protein CP29.2, chloroplastic (LHCB4.2) (LHCII protein 4.2)	At3g08940	6	6	0.428208	1.34556	0.0630476	1.11e-11	-6.05595	-5.62775	Shoot	100kg
Q01667	Chlorophyll a-b binding protein 6, chloroplastic (LHCI-730) (LHCII type III CAB-6) (Light-harvesting complex protein Lhca1)	At3g54890	3	2	0.429788	1.34704	0.101045	2.11e-05	-6.37553	-6.0512	Shoot	1500g
Q9SSS9	F-type H+-transporting ATPase subunit delta (H+-transporting ATP synthase-like protein) (Putative H+-transporting ATP synthase)	At4g09650	2	2	0.438131	1.35485	0.109202	6.02e-05	-5.89277	-5.45464	Shoot	100kg
P56767	Photosystem I P700 chlorophyll a apoprotein A2 (EC 1.97.1.12) (PSI-B) (PsaB)	atcg00340	5	6	0.438527	1.35522	0.0679953	1.12e-10	-6.16704	-5.70788	Shoot	100kg
P56761	Photosystem II D2 protein (PSII D2 protein) (EC 1.10.3.9) (Photosystem Q(A) protein)	atcg00270	7	5	0.440882	1.35743	0.0672207	5.43e-11	-4.97911	-4.50084	Shoot	100kg
Q9S7H1	Photosystem I reaction center subunit II-1, chloroplastic (Photosystem I 20 kDa subunit 1) (PSI-D1)	At4g02770	3	1	0.445629	1.36191	0.139862	0.00144148	-6.36594	-5.92686	Shoot	1500g
Q42139	At4g32260/F10M6_100 (ATP synthase beta chain (Subunit II)) (EC 3.6.1.34) (F-type H+-transporting ATPase subunit b) (H+-transporting ATP synthase chain 9-like protein) (H+-transporting ATP synthase chain9 - like protein)	At4g32260	5	5	0.449998	1.36604	0.0738854	1.13e-09	-6.12236	-5.69172	Shoot	100kg
P56773	Cytochrome b6	atcg00720	3	3	0.450179	1.36621	0.0891627	4.44e-07	-5.68386	-5.23368	Shoot	100kg
P27521	Chlorophyll a-b binding protein 4, chloroplastic (LHCI type III CAB-4)	At3g47470	4	5	0.452719	1.36862	0.0757796	2.31e-09	-6.19608	-5.7525	Shoot	100kg
Q42029_Q42029-2	Oxygen-evolving enhancer protein 2-1, chloroplastic (OEE2) (23 kDa subunit of oxygen evolving system of photosystem II) (23 kDa thylakoid membrane protein) (OEC 23 kDa subunit) (OEC23)	At1g06680	6	4	0.454982	1.37077	0.0714499	1.92e-10	-6.22763	-5.79811	Shoot	1500g
Q9XF88	Chlorophyll a-b binding protein CP29.2, chloroplastic (LHCB4.2) (LHCII protein 4.2)	At3g08940	6	6	0.457398	1.37306	0.0595531	1.58e-14	-6.21788	-5.76048	Shoot	1500g
Q9S841	Oxygen-evolving enhancer protein 1-2, chloroplastic (OEE1) (33 kDa subunit of oxygen evolving system of photosystem II) (33 kDa thylakoid membrane protein) (Manganese-stabilizing protein 2) (MSP-2) (OEC 33 kDa subunit)	At3g50820	2	2	0.484814	1.39941	0.109202	9.01e-06	-6.16605	-5.68123	Shoot	100kg
Q42029_Q42029-2	Oxygen-evolving enhancer protein 2-1, chloroplastic (OEE2) (23 kDa subunit of oxygen evolving system of photosystem II) (23 kDa thylakoid membrane protein) (OEC 23 kDa subunit) (OEC23)	At1g06680	4	5	0.502871	1.41703	0.0683228	1.84e-13	-6.23393	-5.71789	Shoot	soluble
Q9S7N7	Photosystem I reaction center subunit V, chloroplastic (PSI-G)	At1g55670	3	2	0.50636	1.42046	0.105791	1.7e-06	-5.99847	-5.47093	Shoot	100kg
Q9S841	Oxygen-evolving enhancer protein 1-2, chloroplastic (OEE1) (33 kDa subunit of oxygen evolving system of photosystem II) (33 kDa thylakoid membrane protein) (Manganese-stabilizing protein 2) (MSP-2) (OEC 33 kDa subunit)	At3g50820	2	2	0.509224	1.42328	0.103149	7.94e-07	-6.36418	-5.85496	Shoot	1500g
P27521	Chlorophyll a-b binding protein 4, chloroplastic (LHCI type III CAB-4)	At3g47470	3	3	0.514819	1.42881	0.0842208	9.79e-10	-6.32655	-5.81173	Shoot	1500g
Q9XF89	Chlorophyll a-b binding protein CP26, chloroplastic (LHCB5) (LHCIIc) (Light-harvesting complex II protein 5)	At4g10340	7	6	0.515474	1.42946	0.0630706	3.01e-16	-6.37877	-5.74151	Shoot	1500g
P56773	Cytochrome b6	atcg00720	3	2	0.521065	1.43501	0.101045	2.51e-07	-5.75599	-5.2472	Shoot	1500g
Q9XFT3-2	Oxygen-evolving enhancer protein 3-1, chloroplastic (OEE3) (16 kDa subunit of oxygen evolving system of photosystem II) (OEC 16 kDa subunit)	At4g21280	4	4	0.537923	1.45188	0.0689898	6.33e-15	-6.44172	-5.9038	Shoot	soluble
P56778	Photosystem II CP43 reaction center protein (PSII 43 kDa protein) (Protein CP-43)	atcg00280	13	8	0.537929	1.45189	0.0503589	1.24e-26	-5.12725	-4.57466	Shoot	1500g
Q9XF91	Photosystem II 22 kDa protein, chloroplastic (CP22)	At1g44575	5	6	0.545097	1.45912	0.0679953	1.09e-15	-6.23944	-5.69731	Shoot	100kg
P27202	Photosystem II 10 kDa polypeptide, chloroplastic	At1g79040	2	1	0.570483	1.48502	0.141389	5.46e-05	-5.45701	-4.86404	Shoot	1500g
P56778	Photosystem II CP43 reaction center protein (PSII 43 kDa protein) (Protein CP-43)	atcg00280	14	14	0.571723	1.4863	0.0412743	1.24e-43	-5.10098	-4.52926	Shoot	100kg
P27202	Photosystem II 10 kDa polypeptide, chloroplastic	At1g79040	2	1	0.576222	1.49094	0.147141	9e-05	-5.22024	-4.74763	Shoot	100kg
Q9LMQ2	Chlorophyll A-B binding protein (F7H2.16 protein) (Lhcb6 protein) (Light harvesting complex photosystem II subunit 6) (Putative chlorophyll binding protein)	At1g15820	6	5	0.585787	1.50086	0.0645754	1.18e-19	-6.24119	-5.64152	Shoot	1500g
Q9FKW6	Ferredoxin--NADP reductase, leaf isozyme 1, chloroplastic (EC 1.18.1.2) (Leaf FNR 1) (atLFNR1) (FNR-1)	At5g66190	1	1	0.651008	1.57027	0.145875	8.09e-06	-5.9457	-5.29469	Shoot	1500g
Q9LMQ2	Chlorophyll A-B binding protein (F7H2.16 protein) (Lhcb6 protein) (Light harvesting complex photosystem II subunit 6) (Putative chlorophyll binding protein)	At1g15820	6	6	0.677588	1.59946	0.0630476	6.11e-27	-6.17604	-5.49845	Shoot	100kg
P27202	Photosystem II 10 kDa polypeptide, chloroplastic	At1g79040	1	1	0.741459	1.67187	0.13798	7.71e-08	-5.49373	-4.75227	Shoot	soluble
O82660	Photosystem II stability/assembly factor HCF136, chloroplastic	At5g23120	1	1	0.346588	1.27155	0.145875	0.017505	-6.54944	-6.20285	Shoot	1500g
O82660	Photosystem II stability/assembly factor HCF136, chloroplastic	At5g23120	1	2	0.0281939	1.01973	0.13462	0.83411	-6.21636	-6.67548	Shoot	soluble
O82660	Photosystem II stability/assembly factor HCF136, chloroplastic	At5g23120	1	1	0.219852	1.16461	0.154434	0.154564	-6.46775	-6.2479	Shoot	100kg
P92947_P92947-2	Monodehydroascorbate reductase, chloroplastic (MDAR) (EC 1.6.5.4)	At1g63940	1	1	-0.0544461	0.962964	0.154434	0.724425	-6.78105	-6.8355	Shoot	100kg
Q42592	L-ascorbate peroxidase S, chloroplastic/mitochondrial (EC 1.11.1.11) (Stromal ascorbate peroxidase) (atAPx05) (sAPX)	At4g08390	1	1	-0.0444374	0.969668	0.244869	0.855995	-5.70554	-5.74998	Root	soluble
Q9FWR4_Q9FWR4-2	Glutathione S-transferase DHAR1, mitochondrial (EC 2.5.1.18) (Chloride intracellular channel homolog 1) (CLIC homolog 1) (Glutathione-dependent dehydroascorbate reductase 1) (atDHAR1) (GSH-dependent dehydroascorbate reductase 1) (mtDHAR)	At1g19570	2	2	-0.0049202	0.996595	0.113687	0.96548	-4.97201	-4.92046	Root	soluble
P92947	Monodehydroascorbate reductase, chloroplastic (MDAR) (EC 1.6.5.4)	At1g63940	1	1	0.123715	1.08954	0.12836	0.335141	-5.8113	-5.68759	Root	soluble
Q39241	Thioredoxin H5 (atTrxh5) (Protein LOCUS OF INSENSITIVITY TO VICTORIN 1) (Thioredoxin 5) (atTRX5)	At1g45145	2	1	0.128211	1.09294	0.123873	0.30066	-4.82897	-4.78778	Root	soluble
O78310	Superoxide dismutase [Cu-Zn] 2, chloroplastic (EC 1.15.1.1) (Copper/zinc superoxide dismutase 2)	At2g28190	2	2	0.139749	1.10171	0.0975664	0.152043	-6.38124	-6.24149	Shoot	soluble
Q949U7	Peroxiredoxin-2E, chloroplastic (EC 1.11.1.15) (Peroxiredoxin IIE) (Thioredoxin reductase 2E)	At3g52960	3	2	0.1398	1.10175	0.095989	0.145278	-6.32475	-6.21273	Shoot	soluble
Q9XI01	Protein disulfide isomerase-like 1-1 (atPDIL1-1) (EC 5.3.4.1) (Protein disulfide-isomerase 1) (PDI 1) (Protein disulfide-isomerase 5) (atPDI5)	At1g21750	1	2	0.183178	1.13538	0.121087	0.130334	-5.21576	-5.00549	Root	100kg
Q9FNE2	Glutaredoxin-C2 (atGrxC2)	At5g40370	1	1	0.237598	1.17903	0.13798	0.0850728	-5.27572	-5.03812	Shoot	soluble
Q96291	2-Cys peroxiredoxin BAS1, chloroplastic (2-Cys Prx A) (2-Cys peroxiredoxin A) (EC 1.11.1.15) (Thiol-specific antioxidant protein A)	At3g11630	1	2	0.253093	1.19176	0.13462	0.0601003	-6.37228	-6.21944	Shoot	soluble
Q05431	L-ascorbate peroxidase 1, cytosolic (AP) (atAPx01) (EC 1.11.1.11)	At1g07890	4	4	0.296081	1.2278	0.0641802	3.96e-06	-5.2016	-4.90552	Root	soluble
Q9XI01	Protein disulfide isomerase-like 1-1 (atPDIL1-1) (EC 5.3.4.1) (Protein disulfide-isomerase 1) (PDI 1) (Protein disulfide-isomerase 5) (atPDI5)	At1g21750	2	2	0.337187	1.26329	0.0907645	0.000203229	-5.08424	-4.74705	Root	soluble
Q9LU86	Peroxiredoxin Q, chloroplastic (EC 1.11.1.15) (Thioredoxin reductase)	At3g26060	3	3	0.347382	1.27225	0.0796626	1.3e-05	-6.37625	-6.02887	Shoot	soluble
Q05431	L-ascorbate peroxidase 1, cytosolic (AP) (atAPx01) (EC 1.11.1.11)	At1g07890	1	1	0.351898	1.27624	0.0898525	8.99e-05	-5.50871	-5.15681	Root	1500g
Q9XI01	Protein disulfide isomerase-like 1-1 (atPDIL1-1) (EC 5.3.4.1) (Protein disulfide-isomerase 1) (PDI 1) (Protein disulfide-isomerase 5) (atPDI5)	At1g21750	1	1	0.397711	1.31742	0.13798	0.00394671	-5.29287	-4.89516	Shoot	soluble
Q42403	Thioredoxin H3 (atTrxh3) (Thioredoxin 3) (atTRX3)	At5g42980	3	3	0.398763	1.31838	0.0741089	7.42e-08	-4.86935	-4.47059	Root	soluble
Q9M2Z4	Membrane steroid-binding protein 2 (atMP2) (Membrane-associated progesterone-binding protein 3) (atMAPR3)	At3g48890	1	1	0.399505	1.31906	0.124308	0.00130981	-5.26113	-4.86163	Root	100kg
Q42403	Thioredoxin H3 (atTrxh3) (Thioredoxin 3) (atTRX3)	At5g42980	1	1	0.411655	1.33021	0.13798	0.00285022	-4.95118	-4.53953	Shoot	soluble
Q42547	Catalase-3 (EC 1.11.1.6)	At1g20620	3	2	0.490408	1.40484	0.095989	3.24e-07	-4.47855	-3.9222	Shoot	soluble
O48737	Thioredoxin M1, chloroplastic (atTrxm1)	At1g03680	2	1	0.492037	1.40643	0.13462	0.00025717	-5.97537	-5.47138	Shoot	soluble
O48845	Cytochrome b5 isoform B (atCb5-B) (Cytochrome b5 isoform 2) (Cytochrome b5 isoform E) (atCb5-E)	At2g32720	1	1	0.508021	1.4221	0.124308	4.37e-05	-5.07449	-4.56647	Root	100kg
Q9LFA3	Probable monodehydroascorbate reductase, cytoplasmic isoform 3 (MDAR 3) (EC 1.6.5.4)	At3g52880	1	1	0.518962	1.43292	0.13798	0.000169134	-5.87745	-5.35849	Shoot	soluble
Q9SEU8	Thioredoxin M2, chloroplastic (atTrxm2)	At4g03520	2	2	0.526942	1.44087	0.0975664	6.63e-08	-5.68337	-5.15643	Shoot	soluble
Q42564	L-ascorbate peroxidase 3, peroxisomal (atAPx03) (EC 1.11.1.11)	At4g35000	1	1	0.530659	1.44459	0.124308	1.96e-05	-5.31428	-4.78362	Root	100kg
Q05431	L-ascorbate peroxidase 1, cytosolic (AP) (atAPx01) (EC 1.11.1.11)	At1g07890	4	4	0.555112	1.46928	0.0689898	8.53e-16	-5.47413	-4.91901	Shoot	soluble
Q05431	L-ascorbate peroxidase 1, cytosolic (AP) (atAPx01) (EC 1.11.1.11)	At1g07890	3	3	0.563526	1.47788	0.0717695	4.1e-15	-5.67465	-5.11113	Root	100kg
Q42342	Cytochrome b5 isoform E (atCb5-E) (Cytochrome b5 isoform 1) (Cytochrome b5 isoform A) (atCb5-A)	At5g53560	2	2	0.563938	1.4783	0.0635353	6.93e-19	-5.2423	-4.67836	Root	1500g
Q42342	Cytochrome b5 isoform E (atCb5-E) (Cytochrome b5 isoform 1) (Cytochrome b5 isoform A) (atCb5-A)	At5g53560	3	3	0.570033	1.48456	0.0837203	9.84e-12	-5.18278	-4.7167	Root	100kg
Q9XEX2	Peroxiredoxin-2B (EC 1.11.1.15) (Peroxiredoxin IIB) (Peroxiredoxin TPx1) (Thioredoxin reductase 2B) (Thioredoxin-dependent peroxidase 1)	At1g65980	1	2	0.633093	1.55089	0.123873	3.21e-07	-5.28334	-4.66874	Root	soluble
Q42403	Thioredoxin H3 (atTrxh3) (Thioredoxin 3) (atTRX3)	At5g42980	2	2	0.645092	1.56384	0.0878994	2.15e-13	-5.03704	-4.39195	Root	100kg
Q05431	L-ascorbate peroxidase 1, cytosolic (AP) (atAPx01) (EC 1.11.1.11)	At1g07890	1	2	0.806521	1.74899	0.147141	4.22e-08	-5.82333	-5.03344	Shoot	100kg
P25819	Catalase-2 (EC 1.11.1.6)	At4g35090	1	1	0.81749	1.76234	0.12836	1.91e-10	-5.33256	-4.51507	Root	soluble
P46309	Glutamate--cysteine ligase, chloroplastic (EC 6.3.2.2) (Gamma-ECS) (GCS) (Gamma-glutamylcysteine synthetase) (Protein ROOT MERISTEMLESS 1) (atGCL) (Protein cadmium-sensitive 2) (Protein phytoalexin-deficient 2)	At4g23100	1	1	0.821313	1.76701	0.13798	2.64e-09	-6.05187	-5.23056	Shoot	soluble
Q9C5R8	2-Cys peroxiredoxin BAS1-like, chloroplastic (2-Cys Prx B) (2-Cys peroxiredoxin B) (EC 1.11.1.15) (Thiol-specific antioxidant protein B)	At5g06290	1	1	0.910643	1.87988	0.13798	4.12e-11	-6.77578	-5.86513	Shoot	soluble
Q9SGS4	Thioredoxin-like protein CDSP32, chloroplastic (Chloroplastic drought-induced stress protein of 32 KDa) (atCDSP32)	At1g76080	1	1	1.02623	2.0367	0.13798	1.03e-13	-5.33673	-4.3105	Shoot	soluble
Q8LE52	Glutathione S-transferase DHAR3, chloroplastic (EC 2.5.1.18) (Chloride intracellular channel homolog 3) (CLIC homolog 3) (Glutathione-dependent dehydroascorbate reductase 3) (atDHAR3) (ChlDHAR) (GSH-dependent dehydroascorbate reductase 3)	At5g16710	2	3	1.08176	2.11662	0.095989	1.85e-29	-6.81595	-5.74047	Shoot	soluble
O48529	Rhodanese-like domain-containing protein 9, chloroplastic (Sulfurtransferase 9) (atStr9)	At2g42220	1	2	0.255793	1.19399	0.147141	0.0821367	-6.22272	-6.08521	Shoot	100kg
Q9SA52	Chloroplast stem-loop binding protein of 41 kDa b, chloroplastic (CSP41-b) (Heteroglycan-interacting protein 1.3) (Protein CHLOROPLAST RNA BINDING) (Protein Gb5f)	At1g09340	3	5	0.2042	1.15205	0.0781146	0.0089459	-6.43574	-6.32054	Shoot	soluble
Q9SA52	Chloroplast stem-loop binding protein of 41 kDa b, chloroplastic (CSP41-b) (Heteroglycan-interacting protein 1.3) (Protein CHLOROPLAST RNA BINDING) (Protein Gb5f)	At1g09340	1	1	-0.0119789	0.991731	0.296389	0.967761	-6.29815	-6.31013	Shoot	1500g
Q04836_Q04836-2	31 kDa ribonucleoprotein, chloroplastic (RNA-binding protein 1/2/3) (atRBP33) (RNA-binding protein CP31A) (RNA-binding protein RNP-T) (RNA-binding protein cp31)	At4g24770	2	2	0.0393752	1.02767	0.126357	0.75533	-6.15226	-6.06773	Shoot	soluble
Q94JQ4	Reactive Intermediate Deaminase A, chloroplastic (EC 3.5.99.10) (2-iminobutanoate/2-iminopropanoate deaminase)	At3g20390	1	1	0.0983217	1.07053	0.12836	0.443687	-5.97342	-5.87509	Root	soluble
Q9M2D8	Uncharacterized protein At3g61260	At3g61260	2	2	0.123137	1.0891	0.0878994	0.161247	-5.72374	-5.60061	Root	100kg
Q9STF2	Protein plastid transcriptionally active 16 (Putative uncharacterized protein T6H20.190)	At3g46780	4	4	0.142251	1.10363	0.0772172	0.0654429	-6.01569	-5.87344	Shoot	100kg
Q9STF2	Protein plastid transcriptionally active 16 (Putative uncharacterized protein T6H20.190)	At3g46780	4	2	0.276571	1.21131	0.099977	0.00566883	-6.07332	-5.75298	Shoot	1500g
Q03251	Glycine-rich RNA-binding protein 8 (atGR-RBP8) (atRBG8) (Glycine-rich protein 8) (atGRP8) (Protein COLD, CIRCADIAN RHYTHM, AND RNA BINDING 1) (Protein CCR1)	At4g39260	1	1	0.306994	1.23713	0.12836	0.0167724	-5.01939	-4.7124	Root	soluble
Q8VZG7	At5g07350/T2I1_60 (TUDOR-SN protein 1)	At5g07350	2	2	0.313368	1.24261	0.0878994	0.000363745	-4.99546	-4.6821	Root	100kg
Q9SVM8	Glycine-rich RNA-binding protein 2, mitochondrial (atGR-RBP2) (atRBG2) (Glycine-rich protein 2) (atGRP2) (Mitochondrial RNA-binding protein 1a) (at-mRBP1a)	At4g13850	2	1	0.329378	1.25647	0.123873	0.0078373	-4.53892	-4.15171	Root	soluble
Q9LVT8	At5g47210 (Hyaluronan / mRNA binding family protein) (Putative uncharacterized protein At5g47210)	At5g47210	1	1	0.352464	1.27674	0.13798	0.0106353	-5.40186	-5.0494	Shoot	soluble
Q9FLT0	100 kDa coactivator-like protein (TUDOR-SN protein 2) (Transcription factor-like protein)	At5g61780	2	1	0.432285	1.34937	0.121087	0.000356921	-5.09429	-4.61992	Root	100kg
Q9LYA9	Chloroplast stem-loop binding protein of 41 kDa a, chloroplastic (CSP41-a)	At3g63140	1	2	0.502105	1.41628	0.13462	0.000191633	-6.83658	-6.21118	Shoot	soluble
O04496	Aspartyl protease-like protein (F21M12.13 protein) (Nucleoid DNA-binding-like protein) (Putative uncharacterized protein At1g09750)	At1g09750	1	2	0.528121	1.44205	0.13462	8.74e-05	-6.07089	-5.57779	Shoot	soluble
A1A6M1	At4g13670 (Protein plastid transcriptionally active 5)	At4g13670	1	1	0.561872	1.47618	0.154434	0.000274491	-5.90853	-5.34665	Shoot	100kg
Q39061	RNA-binding protein CP33, chloroplastic (Protein PIGMENT DEFECTIVE 322)	At3g52380	1	1	0.902612	1.86945	0.13798	6.09e-11	-6.17798	-5.27537	Shoot	soluble
Q9LIK9	ATP sulfurylase 1, chloroplastic (atPS1) (EC 2.7.7.4)	At3g22890	1	1	0.137539	1.10003	0.12836	0.283942	-4.42759	-4.29005	Root	soluble
Q9LZ66	Sulfite reductase [ferredoxin], chloroplastic (atSiR) (EC 1.8.7.1)	At5g04590	1	2	0.157781	1.11557	0.13462	0.241176	-6.2441	-5.58763	Shoot	soluble
Q9LIK9	ATP sulfurylase 1, chloroplastic (atPS1) (EC 2.7.7.4)	At3g22890	1	1	0.556461	1.47066	0.13798	5.51e-05	-5.20399	-4.64753	Shoot	soluble
F4J2Z7_F4J2Z7-2	Short-chain dehydrogenase reductase 4 (atSDR4) (EC 1.1.1.-)	At3g29250	1	1	0.262859	1.19985	0.12836	0.0405777	-5.28046	-5.0176	Root	soluble
Q9FN48	Calcium sensing receptor, chloroplastic (Sulfurtransferase 3) (atStr3)	At5g23060	4	6	0.297106	1.22868	0.0748058	7.14e-05	-6.21267	-5.94201	Shoot	100kg
Q9FN48	Calcium sensing receptor, chloroplastic (Sulfurtransferase 3) (atStr3)	At5g23060	2	3	-0.0436499	0.970197	0.101045	0.665754	-6.27981	-6.20096	Shoot	1500g
F4J9G2	Rhodanese/cell cycle control phosphatase superfamily protein	At3g59780	1	1	0.189065	1.14002	0.154434	0.22086	-6.23771	-6.04864	Shoot	100kg
Q9C4Z6	Guanine nucleotide-binding protein subunit beta-like protein B (Receptor for activated C kinase 1B)	At1g48630	1	1	0.173406	1.12772	0.12836	0.176718	-4.45941	-4.28601	Root	soluble
P42644	14-3-3-like protein GF14 psi (General regulatory factor 3) (Protein RARE COLD INDUCIBLE 1A)	At5g38480	1	1	0.222516	1.16677	0.12836	0.0830024	-5.28371	-5.06119	Root	soluble
Q96262_Q96262-2	Plasma membrane-associated cation-binding protein 1 (atPCAP1) (Microtubule-destabilizing protein 25)	At4g20260	1	1	0.270955	1.20661	0.12836	0.0347818	-5.8495	-5.57854	Root	soluble
F4IVN6_P0DH97_P59220_Q03509	Calmodulin-2 / 5 / 6 / 7 (CaM-2/CaM-5/CaM-6/CaM-7)	At2g41110,At2g27030,At5g21274,At3g43810	3	4	0.271621	1.20716	0.072825	0.000191646	-5.31444	-5.06001	Root	soluble
Q9LEX1	At3g61050 (CaLB protein) (Calcium-dependent lipid-binding transcriptional regulator)	At3g61050	1	1	0.337365	1.26345	0.154434	0.0289239	-5.81599	-5.47863	Shoot	100kg
P42643	14-3-3-like protein GF14 chi (General regulatory factor 1)	At4g09000	2	2	0.347033	1.27194	0.0975664	0.000375263	-5.67851	-5.33148	Shoot	soluble
Q9FMD7	Probable inactive receptor kinase At5g16590	At5g16590	1	1	0.3499	1.27447	0.124308	0.00488119	-4.92271	-4.57281	Root	100kg
F4IVN6_P0DH97_P59220_Q03509	Calmodulin-2 / 5 / 6 / 7 (CaM-2/CaM-5/CaM-6/CaM-7)	At2g41110,At2g27030,At5g21274,At3g43810	2	1	0.39938	1.31894	0.121087	0.000972739	-6.11589	-5.66474	Root	100kg
O04151	Calreticulin-1	At1g56340	1	1	0.4645	1.37984	0.12836	0.000296062	-5.06166	-4.59716	Root	soluble
Q96266_Q96266-2	Plasma membrane-associated cation-binding protein 1 (atPCAP1) (Microtubule-destabilizing protein 25)	At4g20260	2	1	0.51653	1.43051	0.13462	0.000124569	-5.99095	-5.45611	Shoot	soluble
P29402	Calnexin homolog 1	At5g61790	5	4	0.520978	1.43493	0.0615149	2.47e-17	-4.89873	-4.36493	Root	100kg
Q8RXF8	Mitochondrial Rho GTPase 1 (atMIRO1) (EC 3.6.5.-) (Miro-related GTPase 1)	At5g27540	1	1	0.53357	1.44751	0.154434	0.000550302	-5.33015	-4.79658	Shoot	100kg
P48347_P48347-2	14-3-3-like protein GF14 epsilon (General regulatory factor 10)	At1g22300	2	2	0.539742	1.45371	0.0907645	2.74e-09	-5.32188	-4.78214	Root	soluble
Q96266_Q96266-2	Plasma membrane-associated cation-binding protein 1 (atPCAP1) (Microtubule-destabilizing protein 25)	At4g20260	2	2	0.553964	1.46811	0.0907645	1.04e-09	-5.39304	-4.83908	Root	soluble
P41916_P41917_Q8H156	GTP-binding nuclear protein Ran-1/2/3 (Ras-related nuclear protein 1/2/3)	At5g20010,At5g20020,At5g55190	1	1	0.566856	1.48129	0.0898525	2.81e-10	-5.18341	-4.61655	Root	1500g
Q96262_Q96262-2	Plasma membrane-associated cation-binding protein 1 (atPCAP1) (Microtubule-destabilizing protein 25)	At4g20260	2	2	0.595587	1.51109	0.0635353	6.98e-21	-6.09868	-5.50309	Root	1500g
Q96299	14-3-3-like protein GF14 mu (General regulatory factor 9)	At2g42590	2	2	0.685848	1.60865	0.0975664	2.07e-12	-5.80122	-5.11537	Shoot	soluble
P29402	Calnexin homolog 1	At5g61790	2	1	0.730879	1.65965	0.147141	6.79e-07	-5.4207	-4.67007	Shoot	100kg
Q9LVA0	BAG family molecular chaperone regulator 7 (Bcl-2-associated athanogene 7)	At5g62390	2	2	0.754031	1.6865	0.113258	2.78e-11	-6.12579	-5.42293	Root	100kg
Q9SSK7	MLP-like protein 34	At1g70850	2	1	-0.236888	0.848574	0.123873	0.0558316	-5.10671	-5.39146	Root	soluble
Q38842	AT0ZI1 protein (ATOZI1 protein) (Stress-induced protein OZI1) (Uncharacterized protein)	At4g00860	2	2	-0.00812634	0.994383	0.0878994	0.92634	-5.5025	-5.51063	Root	100kg
Q9STS7	Chloroplastic lipocalin (Putative uncharacterized protein At3g47860) (Putative uncharacterized protein T23J7.190)	At3g47860	1	1	0.0263288	1.01842	0.145875	0.856768	-6.51533	-6.489	Shoot	1500g
Q41188_Q41188-2	Cold shock protein 2 (atCSP2) (Cold shock domain-containing protein 2) (Glycine-rich protein 2) (atGRP2)	At4g38680	1	1	0.032535	1.02281	0.124308	0.793531	-5.00692	-4.97439	Root	100kg
Q9C8G5	CSC1-like protein ERD4 (Protein EARLY-RESPONSIVE TO DEHYDRATION STRESS 4)	At1g30360	7	7	0.0982972	1.07051	0.0534478	0.065897	-5.86861	-5.70949	Root	100kg
Q9SGH6	Alpha-dioxygenase 1 (Alpha DOX1) (EC 1.14.99.-) (Fatty acid dioxygenase AlphaDOX1) (Pathogen-induced oxygenase) (Plant alpha dioxygenase 1)	At3g01420	1	1	0.104077	1.07481	0.12836	0.417469	-4.94295	-4.83887	Root	soluble
Q9SUR0	At4g23670 protein (At4g23670/F9D16_140) (Polyketide cyclase/dehydrase and lipid transport superfamily protein) (Putative major latex protein)	At4g23670	1	1	0.10931	1.07871	0.12836	0.394443	-4.7857	-4.67639	Root	soluble
Q9STX5	Endoplasmin homolog (Glucose-regulated protein 94 homolog) (GRP-94 homolog) (HSP90-like protein 7) (Protein SHEPHERD)	At4g24190	1	1	0.21234	1.15857	0.12836	0.0980767	-4.66739	-4.45505	Root	soluble
Q9XI93	At1g13930/F16A14.27 (F16A14.14) (F7A19.2 protein) (Salt tolerance-related protein)	At1g13930	1	1	-0.302803	0.810676	0.13798	0.028196	-5.59415	-5.89695	Shoot	soluble
Q94II5_Q9SIJ8	Dessication responsive protein (RD2 protein)	At2g21620	2	2	0.195008	1.14473	0.0907645	0.0316734	-5.47633	-5.28132	Root	soluble
P51818	Heat shock protein 90-3 (atHSP90.3) (HSP81.2) (Heat shock protein 81-3) (HSP81-3)	At5g56010	5	5	0.253354	1.19198	0.0574045	1.02e-05	-4.79428	-4.54093	Root	soluble
Q9ZVF3	MLP-like protein 328	At2g01520	1	1	0.31678	1.24555	0.12836	0.013591	-4.98634	-4.66956	Root	soluble
Q9LTX9	Heat shock 70 kDa protein 7, chloroplastic (Chloroplast heat shock protein 70-2) (cpHsc70-2) (Heat shock protein 70-7) (atHsp70-7)	At5g49910	1	1	0.337333	1.26342	0.13798	0.0144933	-5.74183	-5.4045	Shoot	soluble
P31168	Dehydrin COR47 (Cold-induced COR47 protein)	At1g20440	1	1	0.386226	1.30697	0.124308	0.00188997	-5.54106	-5.15484	Root	100kg
Q9SGH6	Alpha-dioxygenase 1 (Alpha DOX1) (EC 1.14.99.-) (Fatty acid dioxygenase AlphaDOX1) (Pathogen-induced oxygenase) (Plant alpha dioxygenase 1)	At3g01420	2	2	0.442343	1.35881	0.113258	9.4e-05	-5.24385	-4.69773	Root	100kg
P51818_P55737	Heat shock protein 90-2 (atHSP90.2) (HSP 81-2)/ Heat shock protein 90-3 (atHSP90.3) (HSP81-3)	At5g56030,At5g56010	1	2	0.502115	1.41629	0.0880764	1.19e-08	-5.13437	-4.54033	Root	1500g
Q94AW8	Chaperone protein dnaJ 3 (atDjA3) (atJ3)	At3g44110	2	1	0.527867	1.4418	0.121087	1.3e-05	-4.65194	-4.07455	Root	100kg
Q9C8G5	CSC1-like protein ERD4 (Protein EARLY-RESPONSIVE TO DEHYDRATION STRESS 4)	At1g30360	3	6	0.553363	1.4675	0.0849519	7.33e-11	-6.73011	-6.16069	Shoot	100kg
P51818	Heat shock protein 90-3 (atHSP90.3) (HSP81.2) (Heat shock protein 81-3) (HSP81-3)	At5g56010	7	7	0.567821	1.48228	0.0534478	2.31e-26	-5.12856	-4.52904	Root	100kg
P51818_P55737	Heat shock protein 90-2 (atHSP90.2) (HSP 81-2)/ Heat shock protein 90-3 (atHSP90.3) (HSP81-3)	At5g56030,At5g56010	2	2	0.579562	1.4944	0.109202	1.11e-07	-5.60537	-5.02581	Shoot	100kg
Q9STX5	Endoplasmin homolog (Glucose-regulated protein 94 homolog) (GRP-94 homolog) (HSP90-like protein 7) (Protein SHEPHERD)	At4g24190	1	1	0.587453	1.50259	0.13798	2.07e-05	-5.03337	-4.44592	Shoot	soluble
Q9LKR3	Mediator of RNA polymerase II transcription subunit 37a (Heat shock 70 kDa protein 11) (Heat shock protein 70-11) (atHsp70-11) (Luminal-binding protein 1) (atBP1) (BiP1)	At5g28540	2	1	0.633952	1.55181	0.0880764	6.12e-13	-5.35112	-4.56456	Root	1500g
O65719	Heat shock 70 kDa protein 3 (Heat shock cognate 70 kDa protein 3) (Heat shock cognate protein 70-3) (atHsc70-3) (Heat shock protein 70-3) (atHsp70-3)	At3g09440	1	2	0.658841	1.57881	0.121087	5.3e-08	-5.179	-4.42543	Root	100kg
P0C1T5	Elicitor peptide 7	At5g09978	1	1	0.716552	1.64325	0.124308	8.2e-09	-6.21704	-5.50049	Root	100kg
P31168	Dehydrin COR47 (Cold-induced COR47 protein)	At1g20440	1	1	0.736751	1.66642	0.13798	9.32e-08	-5.72734	-4.99059	Shoot	soluble
Q9LKR3	Mediator of RNA polymerase II transcription subunit 37a (Heat shock 70 kDa protein 11) (Heat shock protein 70-11) (atHsp70-11) (Luminal-binding protein 1) (atBP1) (BiP1)	At5g28540	7	2	0.798454	1.73924	0.101754	4.26e-15	-5.2008	-4.53623	Shoot	100kg
Q93VR4	MLP-like protein 423	At1g24020	1	1	0.822835	1.76888	0.13798	2.47e-09	-5.4721	-4.64926	Shoot	soluble
Q9STX5	Endoplasmin homolog (Glucose-regulated protein 94 homolog) (GRP-94 homolog) (HSP90-like protein 7) (Protein SHEPHERD)	At4g24190	1	2	0.90282	1.86972	0.147141	8.48e-10	-5.39518	-4.47651	Shoot	100kg
Q9M328	At3g53990 protein (At3g53990) (At3g53990/F5K20_290) (Adenine nucleotide alpha hydrolases-like superfamily protein) (Putative uncharacterized protein At3g53990) (Putative uncharacterized protein F5K20_290)	At3g53990	1	1	0.908056	1.87652	0.124308	2.78e-13	-5.50517	-4.59711	Root	100kg
Q9SIF2	At2g04030/F3C11.14 (Chaperone protein htpG family protein) (Putative heat shock protein)	At2g04030	5	6	1.03836	2.0539	0.0667286	1.34e-54	-5.70138	-4.64674	Shoot	soluble
P94072	Germin-like protein subfamily 3 member 3 (atGER3) (atGLP2)	At5g20630	1	1	1.06416	2.09095	0.13798	1.23e-14	-6.95101	-5.88685	Shoot	soluble
O22842	Putative chitinase (Putative endochitinase)	At2g43610	1	4	1.31745	2.49225	0.119443	2.74e-28	-8.13439	-6.75577	Root	100kg
Q9SUR0	At4g23670 protein (At4g23670/F9D16_140) (Polyketide cyclase/dehydrase and lipid transport superfamily protein) (Putative major latex protein)	At4g23670	1	1	1.48733	2.8037	0.13798	4.31e-27	-6.55032	-5.06299	Shoot	soluble
P22953	Probable mediator of RNA polymerase II transcription subunit 37e (Heat shock 70 kDa protein 1) (Heat shock cognate 70 kDa protein 1) (Heat shock cognate protein 70-1) (atHsc70-1) (Heat shock protein 70-1) (atHsp70-1) (Protein EARLY-RESPONSIVE TO DEHYDRATION 2)	At5g02500	4	2	0.434576	1.35151	0.0856212	3.86e-07	-5.02593	-4.55096	Root	100kg
P22953	Probable mediator of RNA polymerase II transcription subunit 37e (Heat shock 70 kDa protein 1) (Heat shock cognate 70 kDa protein 1) (Heat shock cognate protein 70-1) (atHsc70-1) (Heat shock protein 70-1) (atHsp70-1) (Protein EARLY-RESPONSIVE TO DEHYDRATION 2)	At5g02500	1	2	0.529926	1.44386	0.13462	8.27e-05	-5.45611	-4.95372	Shoot	soluble
P22953	Probable mediator of RNA polymerase II transcription subunit 37e (Heat shock 70 kDa protein 1) (Heat shock cognate 70 kDa protein 1) (Heat shock cognate protein 70-1) (atHsc70-1) (Heat shock protein 70-1) (atHsp70-1) (Protein EARLY-RESPONSIVE TO DEHYDRATION 2)	At5g02500	2	2	0.674463	1.596	0.109202	6.56e-10	-5.73209	-5.05762	Shoot	100kg
P22953	Probable mediator of RNA polymerase II transcription subunit 37e (Heat shock 70 kDa protein 1) (Heat shock cognate 70 kDa protein 1) (Heat shock cognate protein 70-1) (atHsc70-1) (Heat shock protein 70-1) (atHsp70-1) (Protein EARLY-RESPONSIVE TO DEHYDRATION 2)	At5g02500	2	2	0.0728532	1.05179	0.0907645	0.42217	-4.66769	-4.59484	Root	soluble
Q945K7	Isocitrate dehydrogenase [NAD] catalytic subunit 5, mitochondrial (EC 1.1.1.41) (IDH-V) (Isocitric dehydrogenase 5) (NAD(+)-specific ICDH 5)	At5g03290	1	1	-0.271791	0.828291	0.124308	0.0287847	-5.89052	-6.16231	Root	100kg
Q9FLQ4	Dihydrolipoyllysine-residue succinyltransferase component of 2-oxoglutarate dehydrogenase complex 1, mitochondrial (EC 2.3.1.61) (2-oxoglutarate dehydrogenase complex component E2-1) (OGDC-E2-1) (Dihydrolipoamide succinyltransferase component of 2-oxoglutarate dehydrogenase complex 1) (E2K-1)	At5g55070	1	1	0.0182198	1.01271	0.124308	0.883472	-5.78284	-5.76462	Root	100kg
P93819	Malate dehydrogenase, cytoplasmic 1 (EC 1.1.1.37)	At1g04410	1	2	0.049876	1.03518	0.121087	0.68041	-5.50913	-5.45977	Root	100kg
Q9SN86	Malate dehydrogenase, chloroplastic (EC 1.1.1.37) (pNAD-MDH)	At3g47520	1	1	0.0575404	1.04069	0.13798	0.676663	-6.16927	-6.11173	Shoot	soluble
P93033	Fumarate hydratase 1, mitochondrial (Fumarase 1) (EC 4.2.1.2)	At2g47510	1	1	0.0688197	1.04886	0.12836	0.591859	-6.02337	-5.95455	Root	soluble
Q9SIB9	Aconitate hydratase 2, mitochondrial (Aconitase 2) (EC 4.2.1.3) (Citrate hydro-lyase 2)	At2g05710	1	1	0.0710081	1.05045	0.314539	0.821394	-6.39524	-6.32423	Shoot	soluble
P42737	Beta carbonic anhydrase 2, chloroplastic (atbCA2) (atbetaCA2) (EC 4.2.1.1) (Beta carbonate dehydratase 2)	At5g14740	2	1	0.0798881	1.05694	0.13462	0.55289	-6.06585	-6.03152	Shoot	soluble
P93819	Malate dehydrogenase, cytoplasmic 1 (EC 1.1.1.37)	At1g04410	4	4	0.109593	1.07892	0.0641802	0.0877138	-5.29866	-5.18907	Root	soluble
Q9SRZ6	Cytosolic isocitrate dehydrogenase [NADP] (EC 1.1.1.42)	At1g65930	1	1	0.129425	1.09386	0.145875	0.374953	-5.80264	-5.67321	Shoot	1500g
Q9SRZ6	Cytosolic isocitrate dehydrogenase [NADP] (EC 1.1.1.42)	At1g65930	4	6	0.144379	1.10525	0.0626933	0.021282	-5.19999	-5.08135	Root	soluble
Q94CE4	Beta carbonic anhydrase 4 (atbCA4) (atbetaCA4) (EC 4.2.1.1) (Beta carbonate dehydratase 4)	At1g70410	1	1	0.147811	1.10789	0.12836	0.249512	-5.35389	-5.20608	Root	soluble
Q38799	Pyruvate dehydrogenase E1 component subunit beta-1, mitochondrial (PDHE1-B) (EC 1.2.4.1) (Protein MACCI-BOU)	At5g50850	1	2	0.157692	1.1155	0.123873	0.203013	-5.88892	-5.78637	Root	soluble
P20115_P20115-2	Citrate synthase 4, mitochondrial (EC 2.3.3.16)	At2g44350	1	1	0.168329	1.12376	0.12836	0.189729	-5.59019	-5.42186	Root	soluble
Q9ZP06	Malate dehydrogenase 1, mitochondrial (EC 1.1.1.37) (mNAD-MDH 1)	At1g53240	1	3	0.215808	1.16135	0.144628	0.135657	-6.04159	-5.89978	Shoot	100kg
Q8RWN9	Dihydrolipoyllysine-residue acetyltransferase component 2 of pyruvate dehydrogenase complex, mitochondrial (EC 2.3.1.12) (Dihydrolipoamide S-acetyltransferase component 2 of pyruvate dehydrogenase complex) (Pyruvate dehydrogenase complex component E2 2) (PDC-E2 2) (PDCE2 2)	At3g13930	1	1	0.22619	1.16974	0.124308	0.0688225	-5.50754	-5.28135	Root	100kg
O82662	Succinyl-CoA ligase [ADP-forming] subunit beta, mitochondrial (EC 6.2.1.5) (Succinyl-CoA synthetase beta chain) (SCS-beta)	At2g20420	1	1	0.237794	1.17919	0.12836	0.0639472	-5.52098	-5.28319	Root	soluble
Q9SRZ6	Cytosolic isocitrate dehydrogenase [NADP] (EC 1.1.1.42)	At1g65930	6	5	0.268757	1.20477	0.0740765	0.000285514	-6.09765	-5.75854	Shoot	soluble
Q9LYG3	NADP-dependent malic enzyme 2 (atNADP-ME2) (NADP-malic enzyme 2) (EC 1.1.1.40)	At5g11670	1	2	0.281799	1.21571	0.123873	0.0229118	-5.19198	-4.96737	Root	soluble
Q9ZP06	Malate dehydrogenase 1, mitochondrial (EC 1.1.1.37) (mNAD-MDH 1)	At1g53240	4	3	0.291284	1.22373	0.0786987	0.000214531	-6.14774	-5.79499	Shoot	soluble
P93819	Malate dehydrogenase, cytoplasmic 1 (EC 1.1.1.37)	At1g04410	1	2	0.292128	1.22445	0.0880764	0.000910686	-5.60406	-5.38245	Root	1500g
Q9SIB9	Aconitate hydratase 2, mitochondrial (Aconitase 2) (EC 4.2.1.3) (Citrate hydro-lyase 2)	At2g05710	2	2	0.299972	1.23112	0.113687	0.00832557	-5.70562	-5.3958	Root	soluble
P93819	Malate dehydrogenase, cytoplasmic 1 (EC 1.1.1.37)	At1g04410	2	1	0.304286	1.23481	0.13462	0.0238005	-5.93437	-5.71279	Shoot	soluble
P27140_P27140-3	Beta carbonic anhydrase 1, chloroplastic (atbCA1) (atbetaCA1) (EC 4.2.1.1) (Beta carbonate dehydratase 1) (Protein SALICYLIC ACID-BINDING PROTEIN 3) (atSABP3)	At3g01500	2	3	0.350074	1.27463	0.095989	0.0002653	-6.64764	-6.31416	Shoot	soluble
Q9ZP06	Malate dehydrogenase 1, mitochondrial (EC 1.1.1.37) (mNAD-MDH 1)	At1g53240	1	2	0.373409	1.29541	0.121087	0.00204364	-5.84052	-5.55228	Root	100kg
P42737	Beta carbonic anhydrase 2, chloroplastic (atbCA2) (atbetaCA2) (EC 4.2.1.1) (Beta carbonate dehydratase 2)	At5g14740	1	1	0.426652	1.34411	0.145875	0.00344695	-6.55905	-6.1324	Shoot	1500g
Q42560	Aconitate hydratase 1 (Aconitase 1) (EC 4.2.1.3) (Citrate hydro-lyase 1)	At4g35830	1	1	0.446965	1.36317	0.12836	0.000497478	-5.46899	-5.02202	Root	soluble
Q8H1E2_Q9LVL7	Lactate/malate dehydrogenase family protein (NADP-dependent malate dehydrogenase)	At5g58330	2	3	0.463604	1.37898	0.095989	1.37e-06	-5.92477	-5.47432	Shoot	soluble
Q9ZP06	Malate dehydrogenase 1, mitochondrial (EC 1.1.1.37) (mNAD-MDH 1)	At1g53240	3	2	0.492393	1.40678	0.101045	1.1e-06	-6.53485	-5.7954	Shoot	1500g
Q9ZP06	Malate dehydrogenase 1, mitochondrial (EC 1.1.1.37) (mNAD-MDH 1)	At1g53240	2	1	0.515361	1.42935	0.123873	3.18e-05	-5.61458	-5.02084	Root	soluble
P93819	Malate dehydrogenase, cytoplasmic 1 (EC 1.1.1.37)	At1g04410	1	1	0.531077	1.44501	0.154434	0.000584181	-6.27465	-5.74357	Shoot	100kg
Q9C522	ATP-citrate synthase beta chain protein 1 (ATP-citrate synthase B-1) (EC 2.3.3.8) (ATP-citrate lyase B-1) (Citrate cleavage enzyme B-1)	At3g06650	1	1	0.597086	1.51266	0.13798	1.51e-05	-6.24302	-5.64594	Shoot	soluble
P31414	Pyrophosphate-energized vacuolar membrane proton pump 1 (EC 3.6.1.1) (Pyrophosphate-energized inorganic pyrophosphatase 1) (H(+)-PPase 1) (Vacuolar proton pyrophosphatase 1) (Vacuolar proton pyrophosphatase 3)	At1g15690	3	4	0.0414056	1.02912	0.0708456	0.558918	-4.74235	-4.70374	Root	100kg
Q9C5M0	Mitochondrial dicarboxylate/tricarboxylate transporter DTC (Dicarboxylate/tricarboxylate carrier)	At5g19760	3	4	0.0851505	1.0608	0.0708456	0.229396	-5.69589	-5.62778	Root	100kg
P31167	ADP,ATP carrier protein 1, mitochondrial (ADP/ATP translocase 1) (Adenine nucleotide translocator 1) (ANT 1)	At3g08580	7	4	0.104547	1.07516	0.0710192	0.140995	-5.99666	-5.85701	Shoot	1500g
P31167	ADP,ATP carrier protein 1, mitochondrial (ADP/ATP translocase 1) (Adenine nucleotide translocator 1) (ANT 1)	At3g08580	8	10	0.132934	1.09652	0.0535843	0.0131075	-5.97294	-5.86325	Shoot	100kg
Q9FMF7	Dicarboxylate transporter 2.1, chloroplastic (atpDCT1) (Glutamate/malate translocator)	At5g64290	1	1	0.141079	1.10273	0.154434	0.360968	-6.28818	-6.1471	Shoot	100kg
Q7PC87	ABC transporter G family member 34 (ABC transporter ABCG.34) (atABCG34) (Pleiotropic drug resistance protein 6)	At2g36380	1	1	0.15105	1.11038	0.124308	0.22432	-4.71917	-4.56812	Root	100kg
P54144	Ammonium transporter 1 member 1 (atAMT1;1)	At4g13510	1	1	0.152808	1.11173	0.124308	0.218973	-5.44169	-5.28888	Root	100kg
P31167	ADP,ATP carrier protein 1, mitochondrial (ADP/ATP translocase 1) (Adenine nucleotide translocator 1) (ANT 1)	At3g08580	7	7	0.175986	1.12974	0.0499048	0.000421195	-5.52646	-5.29875	Root	100kg
O23654	V-type proton ATPase catalytic subunit A (V-ATPase subunit A) (EC 3.6.3.14) (V-ATPase 69 kDa subunit) (Vacuolar H(+)-ATPase subunit A) (Vacuolar proton pump subunit alpha)	At1g78900	2	1	0.192661	1.14287	0.123873	0.119872	-6.01974	-5.59304	Root	soluble
Q39258	V-type proton ATPase subunit E1 (V-ATPase subunit E1) (Protein EMBRYO DEFECTIVE 2448) (Vacuolar H(+)-ATPase subunit E isoform 1) (Vacuolar proton pump subunit E1)	At4g11150	2	1	0.195914	1.14545	0.121087	0.10567	-5.61743	-5.40075	Root	100kg
Q9SZN1	V-type proton ATPase subunit B2 (V-ATPase subunit B2) (Vacuolar H(+)-ATPase subunit B isoform 2) (Vacuolar proton pump subunit B2)	At4g38510	1	1	0.214893	1.16062	0.124308	0.0838613	-5.82252	-5.60762	Root	100kg
O65272	K(+) efflux antiporter 2, chloroplastic (atKEA2)	At4g00630	1	2	0.222008	1.16636	0.121087	0.066734	-5.62145	-5.57189	Root	100kg
P19456	ATPase 2, plasma membrane-type (EC 3.6.3.6) (Proton pump 2)	At4g30190	1	1	0.227539	1.17084	0.0898525	0.0113298	-4.85503	-4.62749	Root	1500g
Q9FMU6	Mitochondrial phosphate carrier protein 3, mitochondrial (Mitochondrial phosphate transporter 3) (MPT3) (Phosphate transporter 3;1)	At5g14040	2	3	0.228681	1.17176	0.0627008	0.000265135	-5.58596	-5.41128	Root	1500g
P31167	ADP,ATP carrier protein 1, mitochondrial (ADP/ATP translocase 1) (Adenine nucleotide translocator 1) (ANT 1)	At3g08580	7	4	0.262808	1.19981	0.0441661	2.67e-09	-5.70524	-5.43207	Root	1500g
Q9FMU6	Mitochondrial phosphate carrier protein 3, mitochondrial (Mitochondrial phosphate transporter 3) (MPT3) (Phosphate transporter 3;1)	At5g14040	2	2	0.263492	1.20038	0.0878994	0.00272068	-5.5322	-5.26871	Root	100kg
Q9SRH5	Mitochondrial outer membrane protein porin 1 (Voltage-dependent anion-selective channel protein 1) (atVDAC1) (VDAC-1)	At3g01280	1	1	0.263868	1.20069	0.145875	0.0704716	-5.88156	-5.61769	Shoot	1500g
Q9LX65	V-type proton ATPase subunit H (V-ATPase subunit H) (Vacuolar H(+)-ATPase subunit H) (Vacuolar proton pump subunit H)	At3g42050	1	3	0.276072	1.21089	0.119994	0.0214072	-5.41493	-5.08397	Root	100kg
Q9FJX3	Mitochondrial outer membrane protein porin 2 (Voltage-dependent anion-selective channel protein 2) (atVDAC2) (VDAC-2)	At5g67500	1	2	0.29173	1.22411	0.121087	0.0159847	-5.46474	-5.17069	Root	100kg
Q9SDS7	V-type proton ATPase subunit C (V-ATPase subunit C) (Vacuolar H(+)-ATPase subunit C) (Vacuolar proton pump subunit C)	At1g12840	4	4	0.297939	1.22939	0.0621542	1.64e-06	-5.79702	-5.49908	Root	100kg
Q8W4S4	V-type proton ATPase subunit a3 (V-ATPase subunit a3) (V-type proton ATPase 95 kDa subunit a isoform 3) (V-ATPase 95 kDa isoform a3) (Vacuolar H(+)-ATPase subunit a isoform 3) (Vacuolar proton pump subunit a3) (Vacuolar proton translocating ATPase 95 kDa subunit a isoform 3)	At4g39080	1	2	0.302545	1.23332	0.147141	0.0397678	-5.82554	-5.54162	Shoot	100kg
O23654	V-type proton ATPase catalytic subunit A (V-ATPase subunit A) (EC 3.6.3.14) (V-ATPase 69 kDa subunit) (Vacuolar H(+)-ATPase subunit A) (Vacuolar proton pump subunit alpha)	At1g78900	1	1	0.306539	1.23674	0.0898525	0.000645883	-5.86394	-5.5574	Root	1500g
P11574_Q8W4E2	V-type proton ATPase subunit B1/ B3 (Vacuolar proton pump subunit B1/ B3)	At1g76030,At1g20260	2	3	0.314005	1.24315	0.0627008	5.5e-07	-5.80921	-5.53863	Root	1500g
Q9XIE2	ABC transporter G family member 36 (ABC transporter ABCG.36) (atABCG36) (Pleiotropic drug resistance protein 8) (Protein PENETRATION 3)	At1g59870	3	3	0.322263	1.25029	0.0837203	0.000118464	-4.71773	-4.47123	Root	100kg
Q9SRH5	Mitochondrial outer membrane protein porin 1 (Voltage-dependent anion-selective channel protein 1) (atVDAC1) (VDAC-1)	At3g01280	2	2	0.329323	1.25642	0.109202	0.0025636	-6.01782	-5.6885	Shoot	100kg
Q9SDS7	V-type proton ATPase subunit C (V-ATPase subunit C) (Vacuolar H(+)-ATPase subunit C) (Vacuolar proton pump subunit C)	At1g12840	1	1	0.335837	1.26211	0.0898525	0.000185745	-5.58048	-5.24464	Root	1500g
P31414	Pyrophosphate-energized vacuolar membrane proton pump 1 (EC 3.6.1.1) (Pyrophosphate-energized inorganic pyrophosphatase 1) (H(+)-PPase 1) (Vacuolar proton pyrophosphatase 1) (Vacuolar proton pyrophosphatase 3)	At1g15690	3	3	0.341829	1.26736	0.0891627	0.000126197	-5.83327	-5.49144	Shoot	100kg
Q9LF79	Calcium-transporting ATPase 8, plasma membrane-type (EC 3.6.3.8) (Ca(2+)-ATPase isoform 8)	At5g57110	3	4	0.346275	1.27127	0.0708456	1.02e-06	-5.6513	-5.30268	Root	100kg
O23654	V-type proton ATPase catalytic subunit A (V-ATPase subunit A) (EC 3.6.3.14) (V-ATPase 69 kDa subunit) (Vacuolar H(+)-ATPase subunit A) (Vacuolar proton pump subunit alpha)	At1g78900	14	13	0.364302	1.28726	0.0366475	2.77e-23	-5.95508	-5.49971	Root	100kg
Q9SDS7	V-type proton ATPase subunit C (V-ATPase subunit C) (Vacuolar H(+)-ATPase subunit C) (Vacuolar proton pump subunit C)	At1g12840	2	2	0.373343	1.29535	0.109202	0.000628881	-5.70455	-5.33121	Shoot	100kg
Q9XGM1	V-type proton ATPase subunit D (V-ATPase subunit D) (Vacuolar H(+)-ATPase subunit D) (Vacuolar proton pump subunit D)	At3g58730	3	3	0.379465	1.30086	0.0717695	1.24e-07	-5.65871	-5.27925	Root	100kg
P19456	ATPase 2, plasma membrane-type (EC 3.6.3.6) (Proton pump 2)	At4g30190	8	6	0.387906	1.30849	0.0536604	4.87e-13	-4.90099	-4.51183	Root	100kg
Q94AG6	S-adenosylmethionine carrier 1, chloroplastic/mitochondrial (S-adenosylmethionine transporter 1) (atSAMT1)	At4g39460	1	1	0.395733	1.31561	0.154434	0.0103931	-6.40353	-6.00779	Shoot	100kg
Q9FMU6	Mitochondrial phosphate carrier protein 3, mitochondrial (Mitochondrial phosphate transporter 3) (MPT3) (Phosphate transporter 3;1)	At5g14040	3	1	0.396596	1.3164	0.139862	0.00457352	-6.04206	-5.58591	Shoot	1500g
Q9FF53	Probable aquaporin PIP2-4 (Plasma membrane intrinsic protein 2.4) (atPIP2;4) [Cleaved into: Probable aquaporin PIP2-4, N-terminally processed]	At5g60660	3	3	0.398479	1.31812	0.0717695	2.82e-08	-6.22727	-5.82879	Root	100kg
Q9XGM1	V-type proton ATPase subunit D (V-ATPase subunit D) (Vacuolar H(+)-ATPase subunit D) (Vacuolar proton pump subunit D)	At3g58730	1	1	0.398564	1.31819	0.154434	0.00985729	-5.49899	-5.10042	Shoot	100kg
O23654	V-type proton ATPase catalytic subunit A (V-ATPase subunit A) (EC 3.6.3.14) (V-ATPase 69 kDa subunit) (Vacuolar H(+)-ATPase subunit A) (Vacuolar proton pump subunit alpha)	At1g78900	5	5	0.406168	1.32516	0.0798799	3.68e-07	-5.92407	-5.53583	Shoot	100kg
P93004	Aquaporin PIP2-7 (Plasma membrane intrinsic protein 2-7) (atPIP2;7) (Plasma membrane intrinsic protein 3) (Salt stress-induced major intrinsic protein) [Cleaved into: Aquaporin PIP2-7, N-terminally processed]	At4g35100	1	1	0.409736	1.32844	0.124308	0.000980302	-5.85093	-5.44119	Root	100kg
Q06611	Aquaporin PIP1-2 (atPIP1;2) (Plasma membrane intrinsic protein 1b) (PIP1b) (Transmembrane protein A) (athH2) (TMP-A)	At2g45960	1	1	0.412024	1.33055	0.124308	0.000917973	-5.67493	-5.2629	Root	100kg
O80725	ABC transporter B family member 4 (ABC transporter ABCB.4) (atABCB4) (Multidrug resistance protein 4) (P-glycoprotein 4)	At2g47000	1	1	0.418053	1.33612	0.124308	0.00077092	-5.24878	-4.83072	Root	100kg
O23654	V-type proton ATPase catalytic subunit A (V-ATPase subunit A) (EC 3.6.3.14) (V-ATPase 69 kDa subunit) (Vacuolar H(+)-ATPase subunit A) (Vacuolar proton pump subunit alpha)	At1g78900	1	1	0.421343	1.33917	0.13798	0.00226069	-5.9907	-5.56936	Shoot	soluble
Q08733	Aquaporin PIP1-3 (atPIP1;3) (Plasma membrane intrinsic protein 1c) (PIP1c) (Transmembrane protein B) (TMP-B)	At1g01620	1	2	0.422031	1.33981	0.121087	0.000491465	-5.73125	-5.32779	Root	100kg
P43286	Aquaporin PIP2-1 (Plasma membrane intrinsic protein 2-1) (atPIP2;1) (Plasma membrane intrinsic protein 2a) (PIP2a) [Cleaved into: Aquaporin PIP2-1, N-terminally processed]	At3g53420	1	2	0.425341	1.34289	0.121087	0.000443583	-5.38851	-4.85975	Root	100kg
O82628	V-type proton ATPase subunit G1 (V-ATPase subunit G1) (Vacuolar H(+)-ATPase subunit G isoform 1) (Vacuolar proton pump subunit G1)	At3g01390	2	2	0.441956	1.35844	0.0878994	4.96e-07	-5.73948	-5.29753	Root	100kg
P19456	ATPase 2, plasma membrane-type (EC 3.6.3.6) (Proton pump 2)	At4g30190	1	1	0.443905	1.36028	0.154434	0.00404803	-5.50307	-5.05916	Shoot	100kg
Q8W4E2	V-type proton ATPase subunit B3 (V-ATPase subunit B3) (Vacuolar H(+)-ATPase subunit B isoform 3) (Vacuolar proton pump subunit B3)	At1g20260	1	1	0.476507	1.39137	0.124308	0.000126456	-6.09893	-5.62242	Root	100kg
P11574_Q8W4E2	V-type proton ATPase subunit B1/ B3 (Vacuolar proton pump subunit B1/ B3)	At1g76030,At1g20260	3	5	0.496695	1.41098	0.0858106	7.11e-09	-6.03157	-5.59356	Shoot	100kg
Q9SMX3	Mitochondrial outer membrane protein porin 3 (Protein HYPERSENSITIVE RESPONSE 2) (athsr2) (Voltage-dependent anion-selective channel protein 3) (atVDAC3) (VDAC-3)	At5g15090	6	6	0.503871	1.41801	0.0544885	2.3e-20	-5.48085	-4.92806	Root	100kg
Q56ZI2	Patellin-2	At1g22530	6	6	0.507501	1.42159	0.0544885	1.23e-20	-5.95406	-5.47069	Root	100kg
P20649	ATPase 1, plasma membrane-type (EC 3.6.3.6) (Proton pump 1)	At2g18960	2	4	0.508775	1.42284	0.0856212	2.81e-09	-4.60696	-4.13648	Root	100kg
Q8LAA6	Probable aquaporin PIP1-5 (atPIP1;5) (Plasma membrane intrinsic protein 1d) (PIP1d)	At4g23400	1	2	0.522652	1.43659	0.121087	1.59e-05	-5.96933	-5.72834	Root	100kg
Q56WK6	Patellin-1	At1g72150	2	2	0.523048	1.43699	0.0878994	2.67e-09	-5.74781	-5.22476	Root	100kg
Q9FMU6	Mitochondrial phosphate carrier protein 3, mitochondrial (Mitochondrial phosphate transporter 3) (MPT3) (Phosphate transporter 3;1)	At5g14040	4	4	0.549742	1.46382	0.0841397	6.42e-11	-6.23167	-5.62307	Shoot	100kg
Q9SMX3	Mitochondrial outer membrane protein porin 3 (Protein HYPERSENSITIVE RESPONSE 2) (athsr2) (Voltage-dependent anion-selective channel protein 3) (atVDAC3) (VDAC-3)	At5g15090	2	3	0.553479	1.46762	0.105791	1.68e-07	-6.08184	-5.52798	Shoot	100kg
Q9SRH5	Mitochondrial outer membrane protein porin 1 (Voltage-dependent anion-selective channel protein 1) (atVDAC1) (VDAC-1)	At3g01280	2	2	0.560393	1.47467	0.0635353	1.14e-18	-5.75123	-5.19084	Root	1500g
Q9SRH5	Mitochondrial outer membrane protein porin 1 (Voltage-dependent anion-selective channel protein 1) (atVDAC1) (VDAC-1)	At3g01280	2	2	0.564791	1.47917	0.0878994	1.31e-10	-5.59856	-5.03377	Root	100kg
Q9SMX3	Mitochondrial outer membrane protein porin 3 (Protein HYPERSENSITIVE RESPONSE 2) (athsr2) (Voltage-dependent anion-selective channel protein 3) (atVDAC3) (VDAC-3)	At5g15090	1	2	0.604133	1.52007	0.256681	0.0185908	-6.2377	-5.63357	Shoot	1500g
P61837	Aquaporin PIP1-1 (atPIP1;1) (Plasma membrane aquaporin-1) (Plasma membrane intrinsic protein 1a) (PIP1a)	At3g61430	1	2	0.686723	1.60962	0.121087	1.42e-08	-5.71987	-5.04146	Root	100kg
P93004	Aquaporin PIP2-7 (Plasma membrane intrinsic protein 2-7) (atPIP2;7) (Plasma membrane intrinsic protein 3) (Salt stress-induced major intrinsic protein) [Cleaved into: Aquaporin PIP2-7, N-terminally processed]	At4g35100	1	1	0.691253	1.61468	0.154434	7.6e-06	-6.12064	-5.42939	Shoot	100kg
Q9SMX3	Mitochondrial outer membrane protein porin 3 (Protein HYPERSENSITIVE RESPONSE 2) (athsr2) (Voltage-dependent anion-selective channel protein 3) (atVDAC3) (VDAC-3)	At5g15090	1	2	0.714874	1.64134	0.0880764	4.8e-16	-5.88837	-5.16483	Root	1500g
Q56WK6	Patellin-1	At1g72150	1	1	0.773232	1.70909	0.154434	5.53e-07	-5.56124	-4.78801	Shoot	100kg
O82628	V-type proton ATPase subunit G1 (V-ATPase subunit G1) (Vacuolar H(+)-ATPase subunit G isoform 1) (Vacuolar proton pump subunit G1)	At3g01390	1	1	0.818006	1.76297	0.227079	0.000315411	-6.09898	-5.28097	Root	1500g
Q41951	Aquaporin TIP2-1 (Delta-tonoplast intrinsic protein) (Delta-TIP) (Tonoplast intrinsic protein 2-1) (atTIP2;1) [Cleaved into: Aquaporin TIP2-1, N-terminally processed]	At3g16240	1	1	1.0088	2.01224	0.154434	6.48e-11	-6.24471	-5.2359	Shoot	100kg
